# Supplementary material for: Rhodium(iii)-catalyzed synthesis of indanones via C–H activation of phenacyl phosphoniums and coupling with olefins
Source: Royal Society of Chemistry journal article supplement (doi:10.1039/c7qo00510e), 2017-01-01

## *Supporting Information*

### **Rhodium(III)-Catalyzed Synthesis of Indanones via C-H Activation of Phenacyl Phosphoniums and Coupling with Olefins**

Yunyun Li,<sup>†,‡</sup> Xifa Yang,<sup>†,‡</sup> Lingheng Kong,<sup>†,‡</sup> and Xingwei Li<sup>\*,†</sup>

<sup>†</sup>Dalian Institute of Chemical Physics, Chinese Academy of Sciences, Dalian 116023, China

<sup>‡</sup>University of Chinese Academy of Sciences, Beijing 100049, China

[xwli@dicp.ac.cn](mailto:xwli@dicp.ac.cn)

## **Table of Contents**

|                                                                             |     |
|-----------------------------------------------------------------------------|-----|
| I. General Information.....                                                 | S2  |
| II. Experimental Information for the Preparation of Starting Materials..... | S2  |
| III. Experimental Details and Characterization Data.....                    | S3  |
| IV. Mechanistic Studies.....                                                | S10 |
| V. Gram-scale Synthesis.....                                                | S20 |
| VI. NMR Spectra.....                                                        | S21 |

## I. General Information

Commercially available reagents were used as received without further purification, unless stated otherwise. All reactions were carried out in a nitrogen-filled dry box or using standard Schlenk techniques.  $^1\text{H}$  and  $^{13}\text{C}$  NMR spectra were recorded on a Bruker NMR spectrometer (400 MHz and 100 MHz, respectively) and internally referenced to the tetramethylsilane signal in the solvent indicated.  $^{19}\text{F}$  NMR spectra were recorded on a Bruker NMR spectrometer instrument (376 MHz). HRMS were obtained on an Agilent Q-TOF 6540. Column chromatography was performed on silica gel (300-400 mesh) using ethyl acetate (EA)/petroleum ether (PE) or dichloromethane (DCM)/methanol (MeOH) as eluents. The abundance of  $^{18}\text{O}$  in  $\text{Et}^{18}\text{OH}$  and  $\text{CH}_3\text{C}^{18}\text{O}_2\text{Na}$  was 95% and 98% respectively.

## II. Experimental Information for the Preparation of Starting Materials

Representative Procedure of Preparation of a Phenacyl Phosphonium Salt.<sup>[1]</sup>

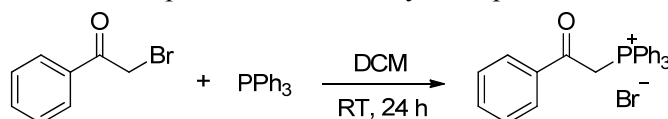

A solution of  $\alpha$ -bromoacetophenone (50.0 mmol) in  $\text{CH}_2\text{Cl}_2$  (30 mL) was added dropwise over 20 min to a solution of triphenylphosphine (50.0 mmol) in  $\text{CH}_2\text{Cl}_2$  (60 mL). The reaction mixture was stirred at room temperature for 24 h, and the mixture was concentrated under reduced pressure and the resulting precipitate was washed with  $\text{Et}_2\text{O}$ . The phosphonium bromide was obtained in quantitative yield, and was used without further purification.

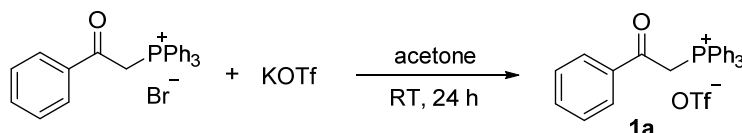

A solution of KOTf (4 equiv) in acetone (10 mL) was added to a solution of (2-oxo-2-phenylethyl)triphenylphosphonium bromide (20 mmol) in acetone (40 mL) and the mixture was stirred for at rt for 24 h. All the solvent was removed under reduced pressure and the residue was washed with DCM. The solution was concentrated to give product **1a** in 95% yield.

**$^1\text{H}$  NMR (400 MHz,  $\text{CDCl}_3$ )**  $\delta$  8.18 (d,  $J$  = 8.1 Hz, 2H), 7.84 – 7.74 (m, 9H), 7.69 – 7.61 (m, 7H), 7.50 (t,  $J$  = 7.6 Hz, 2H), 5.60 (d,  $J$  = 12.4 Hz, 2H).  **$^{13}\text{C}$  NMR (100 MHz,  $\text{CDCl}_3$ )**  $\delta$  191.7, 135.1, 135.0 (d,  $J$  = 3.1 Hz), 133.8, 133.7, 130.4, 130.2, 129.5, 129.1, 118.6 (d,  $J$  = 89.5 Hz), 36.5 (d,  $J$  = 59.2 Hz). HRMS:  $[\text{M}-\text{OTf}]^+$  calculated for  $\text{C}_{26}\text{H}_{22}\text{OP}^+$ : 381.1403, found 381.1403,  $[\text{OTf}]^-$  calculated for  $\text{CF}_3\text{O}_3\text{S}$ : 148.9520, found 148.9524.

### III. Experimental Details and Characterization Data

Representative procedures for the synthesis of indanone derivatives. Phenacyl phosphonium salts **1a** (0.2 mmol), [Cp\*RhCl<sub>2</sub>]<sub>2</sub> (2 mol %), AgSbF<sub>6</sub> (10 mol %), CsOAc (0.4 mmol), and Cu(OAc)<sub>2</sub> (0.42 mmol) were charged into a pressure tube. Ethanol (2 mL) was then added to this tube. The resulting mixture was stirred for seconds under N<sub>2</sub> atmosphere, to which ethyl acrylate (**2a**, 0.4 mmol) was next added. The mixture was stirred at 120 °C for 18 hours. The solvent was then removed under vacuum and the residue was purified by silica gel chromatography using PE/EA (30:1 – 10:1) to afford product **3aa** as a colorless oil (34.7 mg, 80%).

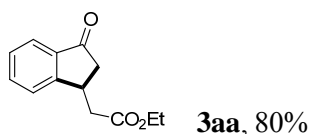

Product **3aa** was obtained as a colorless oil in 80% yield (34.7 mg). <sup>1</sup>H NMR (400 MHz, CDCl<sub>3</sub>) δ 7.76 (d, *J* = 7.7 Hz, 1H), 7.65 – 7.59 (m, 1H), 7.51 (d, *J* = 7.6 Hz, 1H), 7.42 (t, *J* = 7.4 Hz, 1H), 4.17 (q, *J* = 7.1 Hz, 2H), 3.88 – 3.79 (m, 1H), 3.01 (dd, *J* = 19.2, 7.7 Hz, 1H), 2.89 (dd, *J* = 15.9, 5.1 Hz, 1H), 2.56 (dd, *J* = 16.0, 9.3 Hz, 1H), 2.47 (dd, *J* = 19.2, 3.4 Hz, 1H), 1.26 (t, *J* = 7.1 Hz, 3H). <sup>13</sup>C NMR (100 MHz, CDCl<sub>3</sub>) δ 205.4, 171.7, 156.7, 136.8, 134.9, 128.0, 125.4, 123.7, 60.8, 43.3, 40.4, 34.6, 14.2. HRMS: *m/z*: [M + H]<sup>+</sup> calculated for C<sub>13</sub>H<sub>15</sub>O<sub>3</sub><sup>+</sup>: 219.1016, found 219.1017.

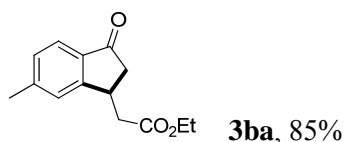

Product **3ba** was obtained as a colorless oil in 85% yield (39.4 mg). <sup>1</sup>H NMR (400 MHz, CDCl<sub>3</sub>) δ 7.64 (d, *J* = 7.8 Hz, 1H), 7.30 (s, 1H), 7.22 (d, *J* = 7.8 Hz, 1H), 4.18 (q, *J* = 7.1 Hz, 2H), 3.80 – 3.74 (m, 1H), 2.98 (dd, *J* = 19.1, 7.7 Hz, 1H), 2.87 (dd, *J* = 15.9, 5.1 Hz, 1H), 2.52 (dd, *J* = 15.9, 9.3 Hz, 1H), 2.47 – 2.40 (m, 4H), 1.26 (t, *J* = 7.1 Hz, 3H). <sup>13</sup>C NMR (100 MHz, CDCl<sub>3</sub>) δ 204.9, 171.8, 157.2, 146.1, 134.6, 129.3, 125.8, 123.5, 60.8, 43.5, 40.5, 34.4, 22.2, 14.2. HRMS: *m/z*: [M + H]<sup>+</sup> calculated for C<sub>14</sub>H<sub>17</sub>O<sub>3</sub><sup>+</sup>: 233.1172, found 233.1174.

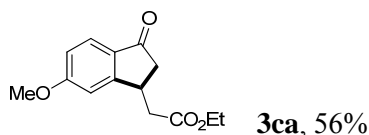

Product **3ca** was obtained as a colorless oil in 56% yield (28.0 mg). <sup>1</sup>H NMR (400 MHz, CDCl<sub>3</sub>) δ 7.69 (d, *J* = 9.2 Hz, 1H), 6.95 – 6.93 (m, 2H), 4.18 (q, *J* = 7.1 Hz, 2H), 3.89 (s, 3H), 3.81 – 3.73 (m, 1H), 2.98 (dd, *J* = 19.0, 7.7 Hz, 1H), 2.86 (dd, *J* = 15.9, 5.3 Hz, 1H), 2.54 (dd, *J* = 15.9, 9.2 Hz, 1H), 2.43 (dd, *J* = 19.0, 3.3 Hz, 1H), 1.27 (t, *J* = 7.1 Hz, 3H). <sup>13</sup>C NMR (100 MHz, CDCl<sub>3</sub>) δ 203.5, 171.8, 165.4, 159.7, 130.1, 125.4, 115.7, 108.9, 60.8, 55.7, 43.5, 40.5, 34.5, 14.2. HRMS: *m/z*: [M + H]<sup>+</sup> calculated for C<sub>14</sub>H<sub>17</sub>O<sub>4</sub><sup>+</sup>: 249.1121, found 249.1124.

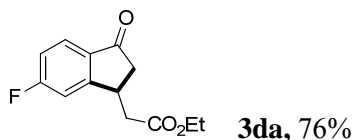

Product **3da** was obtained as a colorless oil in 76% yield (35.8 mg). **<sup>1</sup>H NMR (400 MHz, CDCl<sub>3</sub>)**  $\delta$  7.76 (dd,  $J$  = 8.4, 5.3 Hz, 1H), 7.18 (dd,  $J$  = 8.6, 1.9 Hz, 1H), 7.11 (ddd,  $J$  = 8.5, 2.2, 1.1 Hz, 1H), 4.18 (q,  $J$  = 7.1 Hz, 2H), 3.85 – 3.77 (m, 1H), 3.02 (dd,  $J$  = 19.2, 7.8 Hz, 1H), 2.85 (dd,  $J$  = 16.1, 5.5 Hz, 1H), 2.59 (dd,  $J$  = 16.1, 8.8 Hz, 1H), 2.48 (dd,  $J$  = 19.2, 3.4 Hz, 1H), 1.26 (t,  $J$  = 7.1 Hz, 3H). **<sup>13</sup>C NMR (100 MHz, CDCl<sub>3</sub>)**  $\delta$  203.3, 171.4, 167.2 (d,  $J$  = 256.5 Hz), 159.6 (d,  $J$  = 9.5 Hz), 133.3 (d,  $J$  = 1.8 Hz), 126.1 (d,  $J$  = 10.4 Hz), 116.3 (d,  $J$  = 23.8 Hz), 112.3 (d,  $J$  = 22.6 Hz), 60.9, 43.4, 40.1, 34.4, 14.2. **<sup>19</sup>F NMR (376 MHz, CDCl<sub>3</sub>)**  $\delta$  -102.1. HRMS:  $m/z$ : [M + H]<sup>+</sup> calculated for C<sub>13</sub>H<sub>14</sub>FO<sub>3</sub><sup>+</sup>: 237.0921, found 237.0923.

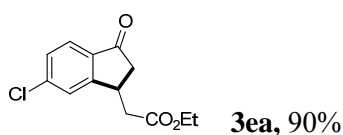

Product **3ea** was obtained as a white solid in 90% yield (40.1 mg). **<sup>1</sup>H NMR (400 MHz, CDCl<sub>3</sub>)**  $\delta$  7.68 (d,  $J$  = 8.2 Hz, 1H), 7.51 (s, 1H), 7.39 (dd,  $J$  = 8.2, 1.2 Hz, 1H), 4.18 (q,  $J$  = 7.1 Hz, 2H), 3.85 – 3.76 (m, 1H), 3.01 (dd,  $J$  = 19.2, 7.8 Hz, 1H), 2.86 (dd,  $J$  = 16.1, 5.4 Hz, 1H), 2.58 (dd,  $J$  = 16.1, 8.8 Hz, 1H), 2.48 (dd,  $J$  = 19.2, 3.5 Hz, 1H), 1.26 (t,  $J$  = 7.1 Hz, 3H). **<sup>13</sup>C NMR (100 MHz, CDCl<sub>3</sub>)**  $\delta$  203.7, 171.4, 158.1, 141.4, 135.3, 128.8, 125.8, 124.9, 60.9, 43.3, 40.1, 34.3, 14.2. HRMS:  $m/z$ : [M + H]<sup>+</sup> calculated for C<sub>13</sub>H<sub>14</sub>ClO<sub>3</sub><sup>+</sup>: 253.0626, found 253.0626.

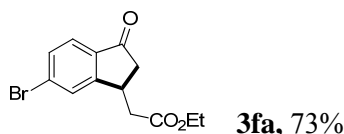

Product **3fa** was obtained as a yellow solid in 73% yield (43.5 mg). **<sup>1</sup>H NMR (400 MHz, CDCl<sub>3</sub>)**  $\delta$  7.69 (s, 1H), 7.61 (d,  $J$  = 8.1 Hz, 1H), 7.55 (dd,  $J$  = 8.2, 1.1 Hz, 1H), 4.18 (q,  $J$  = 7.2 Hz, 2H), 3.86 – 3.77 (m, 1H), 2.99 (dd,  $J$  = 19.3, 7.8 Hz, 1H), 2.86 (dd,  $J$  = 16.1, 5.3 Hz, 1H), 2.58 (dd,  $J$  = 16.1, 8.9 Hz, 1H), 2.46 (dd,  $J$  = 19.3, 3.4 Hz, 1H), 1.26 (t,  $J$  = 7.1 Hz, 3H). **<sup>13</sup>C NMR (100 MHz, CDCl<sub>3</sub>)**  $\delta$  203.9, 171.4, 158.2, 135.7, 131.7, 130.2, 128.9, 125.0, 60.9, 43.2, 40.1, 34.3, 14.2. HRMS:  $m/z$ : [M + H]<sup>+</sup> calculated for C<sub>13</sub>H<sub>14</sub>BrO<sub>3</sub><sup>+</sup>: 297.0121, found 297.0125.

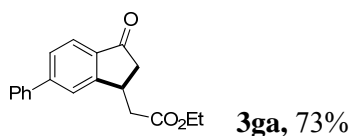

Product **3ga** was obtained as a yellow oil in 73% yield (42.7 mg). **<sup>1</sup>H NMR (400 MHz, CDCl<sub>3</sub>)**  $\delta$  7.81 (d,  $J$  = 8.0 Hz, 1H), 7.69 (s, 1H), 7.65 – 7.59 (m, 3H), 7.50 – 7.45 (m, 2H), 7.43 – 7.39 (m, 1H), 4.18 (q,  $J$  = 7.1 Hz, 2H), 3.90 – 3.84 (m, 1H), 3.04 (dd,  $J$  = 19.2, 7.7 Hz, 1H), 2.94 (dd,  $J$  = 15.9, 5.1 Hz, 1H), 2.60 (dd,  $J$  = 15.9, 9.3 Hz, 1H), 2.51 (dd,  $J$  = 19.2, 3.4 Hz, 1H), 1.25 (t,  $J$  = 7.1 Hz, 3H). **<sup>13</sup>C NMR (100 MHz, CDCl<sub>3</sub>)**  $\delta$  204.9, 171.7, 157.4, 148.0, 140.1, 135.7, 129.0, 128.5, 127.5, 127.5, 124.1, 124.0, 60.8, 43.6, 40.5, 34.6, 14.2. HRMS:

m/z:  $[M + H]^+$  calculated for  $C_{19}H_{19}O_3^+$ : 295.1329, found 295.1331.

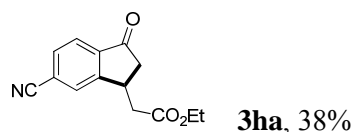

Product **3ha** was obtained as a white solid in 38% yield (18.7 mg).  **$^1H$  NMR (400 MHz,  $CDCl_3$ )**  $\delta$  7.88 – 7.81 (m, 2H), 7.70 (d,  $J$  = 7.8 Hz, 1H), 4.18 (q,  $J$  = 7.1 Hz, 2H), 3.92 – 3.85 (m, 1H), 3.07 (dd,  $J$  = 19.5, 7.9 Hz, 1H), 2.87 (dd,  $J$  = 16.4, 5.6 Hz, 1H), 2.66 (dd,  $J$  = 16.4, 8.2 Hz, 1H), 2.55 (dd,  $J$  = 19.5, 3.5 Hz, 1H), 1.25 (t,  $J$  = 7.1 Hz, 3H).  **$^{13}C$  NMR (100 MHz,  $CDCl_3$ )**  $\delta$  203.6, 171.1, 156.5, 139.8, 131.7, 129.9, 124.5, 118.0, 117.9, 61.1, 43.2, 39.8, 34.4, 14.2. HRMS: m/z:  $[M + H]^+$  calculated for  $C_{14}H_{14}NO_3^+$ : 244.0968, found 244.0970.

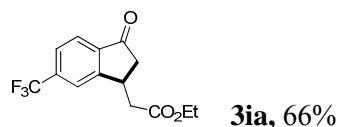

Product **3ia** was obtained as a white solid in 66% yield (37.7 mg).  **$^1H$  NMR (400 MHz,  $CDCl_3$ )**  $\delta$  7.86 (d,  $J$  = 8.0 Hz, 1H), 7.80 (s, 1H), 7.68 (d,  $J$  = 8.0 Hz, 1H), 4.18 (qd,  $J$  = 7.1, 1.7 Hz, 2H), 3.94 – 3.85 (m, 1H), 3.08 (dd,  $J$  = 19.4, 7.8 Hz, 1H), 2.91 (dd,  $J$  = 16.1, 5.4 Hz, 1H), 2.64 (dd,  $J$  = 16.1, 8.7 Hz, 1H), 2.55 (dd,  $J$  = 19.4, 3.5 Hz, 1H), 1.25 (t,  $J$  = 7.1 Hz, 3H).  **$^{13}C$  NMR (100 MHz,  $CDCl_3$ )**  $\delta$  204.1, 171.3, 156.7, 139.5, 136.2 (q,  $J$  = 32.3 Hz), 125.2 (q,  $J$  = 3.5 Hz), 124.3, 123.6 (q,  $J$  = 273.2 Hz), 122.8 (q,  $J$  = 3.9 Hz), 61.0, 43.4, 40.0, 34.6, 14.1.  **$^{19}F$  NMR (376 MHz,  $CDCl_3$ )**  $\delta$  -62.8. HRMS: m/z:  $[M + H]^+$  calculated for  $C_{14}H_{14}F_3O_3^+$ : 287.0890, found 287.0890.

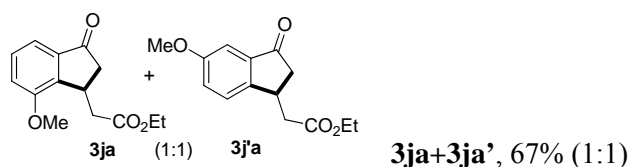

Product **3ja** and **3ja'** was obtained as a white solid in 67% yield as a 1:1 mixture (37.7 mg).  **$^1H$  NMR (400 MHz,  $CDCl_3$ )**  $\delta$  7.42 – 7.33 (m, 3H), 7.22 – 7.18 (m, 2H), 7.06 (dd,  $J$  = 7.5, 1.2 Hz, 1H), 4.20 – 4.11 (m, 4H), 3.91 (s, 3H), 3.89 – 3.83 (m, 4H), 3.80 – 3.72 (m, 1H), 3.27 (dd,  $J$  = 16.1, 3.5 Hz, 1H), 3.05 – 2.94 (m, 2H), 2.84 (dd,  $J$  = 15.9, 5.2 Hz, 1H), 2.56 – 2.44 (m, 3H), 2.38 (dd,  $J$  = 16.1, 10.3 Hz, 1H), 1.27 – 1.23 (m, 6H).  **$^{13}C$  NMR (100 MHz,  $CDCl_3$ )**  $\delta$  205.8, 205.2, 172.2, 171.8, 159.8, 157.2, 149.5, 144.6, 138.7, 138.1, 129.7, 126.2, 124.1, 115.5, 115.3, 104.9, 60.8, 60.6, 55.6, 55.5, 43.9, 43.4, 40.6, 38.3, 34.0, 32.8, 14.205, 14.20. HRMS: m/z:  $[M + H]^+$  calculated for  $C_{14}H_{17}O_4^+$ : 249.1121, found 249.1125.

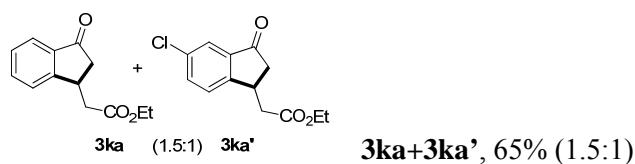

Product **3ka** and **3ka'** was obtained as a colorless oil in 65% yield as a 1.5:1 mixture (33.0 mg).  **$^1H$  NMR (400 MHz,  $CDCl_3$ )** Mixture:  $\delta$  7.70 (d,  $J$  = 2.0 Hz, 1H), 7.67 (d,  $J$  = 7.5 Hz, 1.5H), 7.63 – 7.54 (m, 2.5H), 7.46 (d,  $J$  = 8.2 Hz, 1H), 7.39 (t,  $J$  = 7.7 Hz, 1.5H), 4.20 – 4.10

(m, 5H), 3.95 – 3.89 (m, 1.5H), 3.85 – 3.76 (m, 1H), 3.26 (dd,  $J = 16.3, 3.2$  Hz, 1H), 3.08 – 2.96 (m, 2.5H), 2.85 (dd,  $J = 16.1, 5.3$  Hz, 1H), 2.62 – 2.43 (m, 5H), 1.27 – 1.20 (m, 7.5H).  $^{13}\text{C}$  NMR (100 MHz,  $\text{CDCl}_3$ ) Major:  $\delta$  204.4, 171.5, 152.9, 139.2, 135.2, 132.5, 129.7, 122.2, 60.8, 43.4, 37.9, 34.2, 14.2. Minor:  $\delta$  203.8, 154.7, 138.4, 134.9, 134.5, 126.8, 123.6, 60.9, 43.6, 40.2, 34.3, 14.15. HRMS:  $m/z$ :  $[\text{M} + \text{H}]^+$  calculated for  $\text{C}_{13}\text{H}_{14}\text{ClO}_3^+$ : 253.0626, found 253.0626.

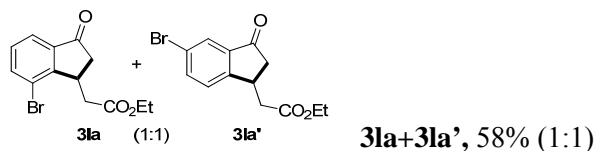

Product **3la** and **3la'** was obtained as a yellow oil in 58% yield as a 1:1 mixture (34.6 mg).  $^1\text{H}$  NMR (400 MHz,  $\text{CDCl}_3$ )  $\delta$  7.87 (d,  $J = 1.9$  Hz, 1H), 7.78 (dd,  $J = 7.8, 0.9$  Hz, 1H), 7.73 – 7.70 (m, 2H), 7.41 (d,  $J = 8.2$  Hz, 1H), 7.32 (t,  $J = 7.7$  Hz, 1H), 4.19 – 4.10 (m, 4H), 3.90 – 3.83 (m, 1H), 3.82 – 3.74 (m, 1H), 3.29 (dd,  $J = 16.3, 3.1$  Hz, 1H), 3.04 (dd,  $J = 7.7, 5.0$  Hz, 1H), 2.99 (dd,  $J = 7.8, 5.0$  Hz, 1H), 2.85 (dd,  $J = 16.1, 5.3$  Hz, 1H), 2.63 – 2.54 (m, 2H), 2.52 – 2.43 (m, 2H), 1.26 – 1.22 (m, 6H).  $^{13}\text{C}$  NMR (100 MHz,  $\text{CDCl}_3$ )  $\delta$  204.5, 203.7, 171.4, 155.2, 154.8, 139.3, 138.7, 138.4, 137.6, 129.9, 127.1, 126.7, 122.8, 122.4, 121.4, 60.9, 60.8, 43.5, 43.4, 40.1, 38.1, 35.7, 34.3, 14.2, 14.15. HRMS:  $m/z$ :  $[\text{M} + \text{H}]^+$  calculated for  $\text{C}_{13}\text{H}_{14}\text{BrO}_3^+$ : 297.0121, found 297.0125.

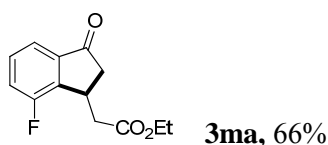

Product **3ma** was obtained as a yellow solid in 66% yield (31.2 mg). **<sup>1</sup>H NMR (400 MHz, CDCl<sub>3</sub>)**  $\delta$  7.57 (d,  $J$  = 7.5 Hz, 1H), 7.45 – 7.38 (m, 1H), 7.31 – 7.27 (m, 1H), 4.14 (q,  $J$  = 7.1 Hz, 2H), 4.01 – 3.91 (m, 1H), 3.13 (dd,  $J$  = 16.2, 3.8 Hz, 1H), 3.03 (dd,  $J$  = 19.4, 7.8 Hz, 1H), 2.58 – 2.50 (m, 2H), 1.23 (t,  $J$  = 7.1 Hz, 3H). **<sup>13</sup>C NMR (100 MHz, CDCl<sub>3</sub>)**  $\delta$  204.1 (d,  $J$  = 2.0 Hz), 171.4, 160.3 (d,  $J$  = 251.1 Hz), 141.8 (d,  $J$  = 17.0 Hz), 140.0 (d,  $J$  = 4.3 Hz), 130.2 (d,  $J$  = 6.5 Hz), 121.3 (d,  $J$  = 20.5 Hz), 119.6 (d,  $J$  = 3.9 Hz), 60.8, 43.2, 38.6, 32.2, 14.2. **<sup>19</sup>F NMR (376 MHz, CDCl<sub>3</sub>)**  $\delta$  -118.3. HRMS:  $m/z$ : [M + H]<sup>+</sup> calculated for C<sub>13</sub>H<sub>14</sub>FO<sub>3</sub><sup>+</sup>: 237.0921, found 237.0924.

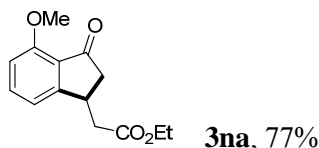

Product **3na** was obtained as a yellow oil in 77% yield (38.2 mg). **<sup>1</sup>H NMR (400 MHz, CDCl<sub>3</sub>)**  $\delta$  7.55 (t,  $J$  = 7.9 Hz, 1H), 7.04 (d,  $J$  = 7.6 Hz, 1H), 6.83 (d,  $J$  = 8.2 Hz, 1H), 4.17 (q,  $J$  = 7.1 Hz, 2H), 3.95 (s, 3H), 3.78 – 3.71 (m, 1H), 2.97 (dd,  $J$  = 18.9, 7.8 Hz, 1H), 2.86 (dd,  $J$  = 15.9, 5.0 Hz, 1H), 2.51 (dd,  $J$  = 15.9, 9.4 Hz, 1H), 2.44 (dd,  $J$  = 18.9, 3.5 Hz, 1H), 1.26 (t,  $J$  = 7.1 Hz, 3H). **<sup>13</sup>C NMR (100 MHz, CDCl<sub>3</sub>)**  $\delta$  203.0, 171.7, 159.4, 158.0, 136.7, 124.8, 117.1, 109.6, 60.8, 55.8, 43.8, 40.6, 34.1, 14.2. HRMS:  $m/z$ : [M + H]<sup>+</sup> calculated for C<sub>14</sub>H<sub>17</sub>O<sub>4</sub><sup>+</sup>: 249.1121, found 249.1118.

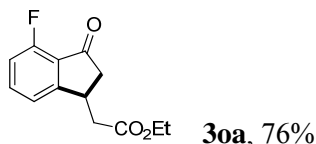

Product **3oa** was obtained as a colorless oil in 76% yield (36.0 mg). **<sup>1</sup>H NMR (400 MHz, CDCl<sub>3</sub>)**  $\delta$  7.62 – 7.57 (m, 1H), 7.29 (d,  $J$  = 7.7 Hz, 1H), 7.02 (t,  $J$  = 8.7 Hz, 1H), 4.17 (q,  $J$  = 7.1 Hz, 2H), 3.86 – 3.80 (m, 1H), 3.02 (dd,  $J$  = 19.1, 7.9 Hz, 1H), 2.88 (dd,  $J$  = 16.1, 5.1 Hz, 1H), 2.59 (dd,  $J$  = 16.1, 9.0 Hz, 1H), 2.50 (dd,  $J$  = 19.1, 3.5 Hz, 1H), 1.26 (t,  $J$  = 7.1 Hz, 3H). **<sup>13</sup>C NMR (100 MHz, CDCl<sub>3</sub>)**  $\delta$  201.5, 171.4, 158.9 (d,  $J$  = 2.2 Hz), 158.8 (d,  $J$  = 264.3 Hz), 136.9 (d,  $J$  = 8.3 Hz), 124.6 (d,  $J$  = 12.9 Hz), 121.2 (d,  $J$  = 4.2 Hz), 114.9 (d,  $J$  = 19.3 Hz), 60.9, 43.8, 40.2, 34.5, 14.2. **<sup>19</sup>F NMR (376 MHz, CDCl<sub>3</sub>)**  $\delta$  -114.6. HRMS:  $m/z$ : [M + H]<sup>+</sup> calculated for C<sub>13</sub>H<sub>14</sub>FO<sub>3</sub><sup>+</sup>: 237.0921, found 237.0924.

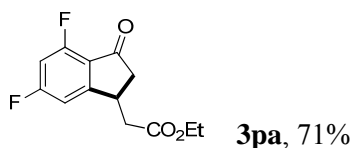

Product **3pa** was obtained as a white solid in 71% yield (35.9 mg). **<sup>1</sup>H NMR (400 MHz, CDCl<sub>3</sub>)**  $\delta$  7.01 (d,  $J$  = 7.8 Hz, 1H), 6.78 (td,  $J$  = 9.0, 1.6 Hz, 1H), 4.18 (q,  $J$  = 7.1 Hz, 2H), 3.86 – 3.76 (m, 1H), 3.03 (dd,  $J$  = 19.1, 7.9 Hz, 1H), 2.84 (dd,  $J$  = 16.3, 5.5 Hz, 1H), 2.61 (dd,

$J = 16.3, 8.6$  Hz, 1H), 2.51 (dd,  $J = 19.1, 3.6$  Hz, 1H), 1.26 (t,  $J = 7.1$  Hz, 3H).  **$^{13}\text{C}$  NMR (100 MHz,  $\text{CDCl}_3$ )**  $\delta$  199.72 (d,  $J = 1.9$  Hz), 171.11, 167.60 (dd,  $J = 259.1, 11.1$  Hz), 160.76 (dd,  $J = 10.7, 4.0$  Hz), 159.36 (dd,  $J = 262.1, 8.9$  Hz), 121.45 (dd,  $J = 13.2, 2.4$  Hz), 108.70 (dd,  $J = 22.5, 4.3$  Hz), 104.22 (dd,  $J = 26.9, 22.9$  Hz), 61.0, 43.9, 39.9, 34.7, 14.2.  **$^{19}\text{F}$  NMR (376 MHz,  $\text{CDCl}_3$ )**  $\delta$  -97.7 (d,  $J = 13.3$  Hz), -109.4 (d,  $J = 13.3$  Hz). HRMS:  $m/z$ :  $[\text{M} + \text{H}]^+$  calculated for  $\text{C}_{13}\text{H}_{13}\text{F}_2\text{O}_3^+$ : 255.0827, found 255.0826.

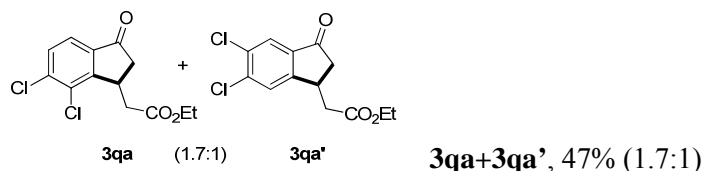

Product **3qa** and **3qa'** was obtained as a yellow oil in 47% yield as a 1.7:1 mixture (27.1 mg).  **$^1\text{H}$  NMR (400 MHz,  $\text{CDCl}_3$ )** Mixture:  $\delta$  7.81 (s, 1H), 7.64 (s, 1H), 7.61 (d,  $J = 8.1$  Hz, 1.7H), 7.54 (d,  $J = 8.1$  Hz, 1.7H), 4.21 – 4.09 (m, 5.4H), 3.98 – 3.89 (m, 1.7H), 3.82 – 3.76 (m, 1H), 3.23 (dd,  $J = 16.4, 3.2$  Hz, 1.7H), 3.03 (dd,  $J = 19.3, 7.8$  Hz, 2.7H), 2.83 (dd,  $J = 16.2, 5.6$  Hz, 1H), 2.65 – 2.56 (m, 2.7H), 2.56 – 2.46 (m, 2.7H), 1.25 – 1.20 (m, 8.1H).  **$^{13}\text{C}$  NMR (100 MHz,  $\text{CDCl}_3$ )** Major:  $\delta$  203.2, 171.2, 154.8, 139.8, 137.4, 130.9, 130.85, 122.5, 60.9, 43.6, 37.7, 34.8, 14.14. Minor:  $\delta$  202.6, 155.4, 139.4, 136.5, 133.2, 127.7, 125.2, 61.0, 43.4, 39.9, 34.0, 14.2. HRMS:  $m/z$ :  $[\text{M} + \text{H}]^+$  calculated for  $\text{C}_{13}\text{H}_{13}\text{Cl}_2\text{O}_3^+$ : 287.0236, found 287.0236.

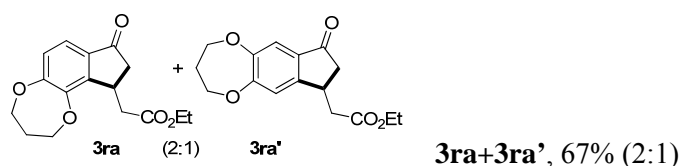

Product **3ra** and **3ra'** was obtained as a colorless oil in 67% yield as a 2:1 mixture (38.9 mg).  **$^1\text{H}$  NMR (400 MHz,  $\text{CDCl}_3$ )** Mixture:  $\delta$  7.35 – 7.29 (m, 3H), 7.01 (d,  $J = 0.6$  Hz, 1H), 6.98 (d,  $J = 8.2$  Hz, 2H), 4.37 – 4.33 (m, 10H), 4.29 – 4.22 (m, 2H), 4.20 – 4.10 (m, 6H), 3.86 – 3.80 (m, 2H), 3.75 – 3.65 (m, 1H), 3.17 (dd,  $J = 15.9, 3.6$  Hz, 2H), 2.95 (dd,  $J = 19.2, 7.8$  Hz, 3H), 2.80 (dd,  $J = 15.9, 5.3$  Hz, 1H), 2.54 – 2.37 (m, 6H), 2.32 – 2.21 (m, 6H), 1.28 – 1.19 (m, 9H).  **$^{13}\text{C}$  NMR (100 MHz,  $\text{CDCl}_3$ )** Major:  $\delta$  204.0, 172.0, 156.5, 148.7, 147.8, 132.8, 122.5, 118.4, 70.27, 60.6, 43.7, 38.8, 32.8, 30.8, 14.19. Minor:  $\delta$  203.7, 171.7, 157.5, 152.5, 151.4, 132.0, 117.2, 115.9, 70.3, 70.2, 60.8, 43.8, 40.5, 33.9, 14.2. HRMS:  $m/z$ :  $[\text{M} + \text{H}]^+$  calculated for  $\text{C}_{16}\text{H}_{19}\text{O}_5^+$ : 291.1227, found 291.1230.

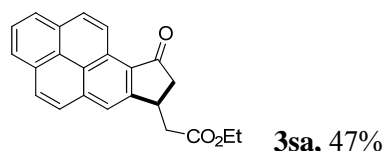

Product **3sa** was obtained as a yellow solid in 47% yield (32.0 mg).  **$^1\text{H}$  NMR (400 MHz, acetone- $d_6$ )**  $\delta$  9.47 (d,  $J = 9.1$  Hz, 1H), 8.46 – 8.42 (m, 4H), 8.34 (d,  $J = 9.0$  Hz, 1H), 8.22 (d,  $J = 9.0$  Hz, 1H), 8.16 (t,  $J = 7.7$  Hz, 1H), 4.22 – 4.11 (m, 3H), 3.25 (dd,  $J = 12.7, 3.4$  Hz, 1H), 3.22 – 3.16 (m, 1H), 2.91 – 2.82 (m, 1H), 2.72 (dd,  $J = 18.7, 3.6$  Hz, 1H), 1.21 (t,  $J = 7.1$  Hz, 3H).  **$^{13}\text{C}$  NMR (100 MHz, DMSO- $d_6$ )**  $\delta$  206.6, 172.1, 156.1, 136.1, 131.2, 130.9, 130.6, 130.4, 128.1, 127.8, 127.7, 127.5, 127.1, 123.8, 123.3, 122.5, 121.6, 60.5, 44.3, 34.4, 14.5.

HRMS:  $m/z$ :  $[M + H]^+$  calculated for  $C_{23}H_{19}O_3^+$ : 343.1329, found 343.1329.

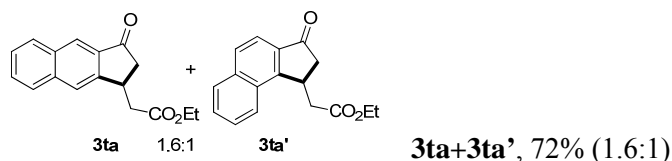

Product **3ta** and **3ta'** was obtained as a yellow oil in 72% yield as a 1.6:1 mixture (38.5 mg). **<sup>1</sup>H NMR (400 MHz, CDCl<sub>3</sub>)** Mixture:  $\delta$  8.31 (s, 1.6H), 8.11 – 8.07 (m, 1H), 8.00 – 7.95 (m, 2.6H), 7.91 (s, 1.6H), 7.88 – 7.84 (m, 2.6H), 7.74 (d,  $J$  = 8.5 Hz, 1H), 7.69 – 7.65 (m, 1.6H), 7.61 – 7.57 (m, 2H), 7.54 – 7.49 (m, 1.6H), 4.34 – 4.29 (m, 1H), 4.22 – 4.14 (m, 5.2H), 4.02 – 3.96 (m, 1.6H), 3.20 (dd,  $J$  = 16.1, 3.0 Hz, 1H), 3.15 – 3.06 (m, 2.6H), 2.99 (dd,  $J$  = 16.0, 5.3 Hz, 1.6H), 2.70 – 2.62 (m, 2.6H), 2.57 (dd,  $J$  = 19.2, 4.1 Hz, 1.6H), 2.39 (dd,  $J$  = 16.1, 10.9 Hz, 1H), 1.27 – 1.23 (m, 7.8H). **<sup>13</sup>C NMR (100 MHz, CDCl<sub>3</sub>)** Major:  $\delta$  205.6, 171.8, 149.8, 137.1, 134.4, 130.4, 129.5, 129.46, 128.7, 128.0, 126.5, 124.5, 124.0, 119.4, 60.8, 44.0, 40.9, 34.2, 14.23. Minor:  $\delta$  205.3, 171.8, 157.1, 137.1, 134.7, 132.6, 129.5, 129.1, 127.3, 124.4, 60.9, 44.0, 41.1, 34.0, 14.2. HRMS:  $m/z$ :  $[M + H]^+$  calculated for  $C_{17}H_{17}O_3^+$ : 269.1172, found 269.1173.

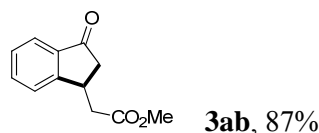

Product **3ab** was obtained as a colorless oil in 87% yield (35.5 mg). **<sup>1</sup>H NMR (400 MHz, CDCl<sub>3</sub>)**  $\delta$  7.76 (d,  $J$  = 7.7 Hz, 1H), 7.62 (td,  $J$  = 7.7, 1.2 Hz, 1H), 7.51 (dd,  $J$  = 7.8, 0.8 Hz, 1H), 7.44 – 7.39 (m, 1H), 3.86 – 3.80 (m, 1H), 3.72 (s, 3H), 3.01 (dd,  $J$  = 19.2, 7.7 Hz, 1H), 2.90 (dd,  $J$  = 16.1, 5.2 Hz, 1H), 2.57 (dd,  $J$  = 16.1, 9.3 Hz, 1H), 2.45 (dd,  $J$  = 19.2, 3.4 Hz, 1H). **<sup>13</sup>C NMR (100 MHz, CDCl<sub>3</sub>)**  $\delta$  205.2, 172.2, 156.6, 136.8, 134.9, 128.1, 125.4, 123.7, 51.9, 43.3, 40.2, 34.5. HRMS:  $m/z$ :  $[M + H]^+$  calculated for  $C_{12}H_{13}O_3^+$ : 205.0859, found 205.0862.

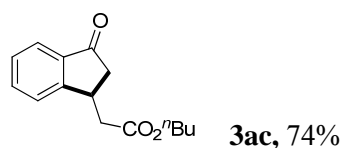

Product **3ac** was obtained as a colorless oil in 74% yield (29.8 mg). **<sup>1</sup>H NMR (400 MHz, CDCl<sub>3</sub>)**  $\delta$  7.76 (d,  $J$  = 7.7 Hz, 1H), 7.65 – 7.59 (m, 1H), 7.51 (d,  $J$  = 7.7 Hz, 1H), 7.41 (t,  $J$  = 7.4 Hz, 1H), 4.12 (t,  $J$  = 6.7 Hz, 2H), 3.88 – 3.79 (m, 1H), 3.00 (dd,  $J$  = 19.2, 7.7 Hz, 1H), 2.90 (dd,  $J$  = 15.9, 5.1 Hz, 1H), 2.56 (dd,  $J$  = 15.9, 9.2 Hz, 1H), 2.46 (dd,  $J$  = 19.2, 3.4 Hz, 1H), 1.64 – 1.56 (m, 2H), 1.40 – 1.31 (m, 2H), 0.93 (t,  $J$  = 7.4 Hz, 3H). **<sup>13</sup>C NMR (100 MHz, CDCl<sub>3</sub>)**  $\delta$  205.3, 171.8, 156.7, 136.8, 134.9, 128.0, 125.4, 123.7, 64.7, 43.3, 40.4, 34.6, 30.6, 19.1, 13.7. HRMS:  $m/z$ :  $[M + H]^+$  calculated for  $C_{15}H_{19}O_3^+$ : 247.1329, found 247.1331.

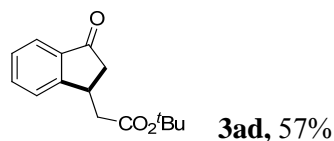

Product **3ad** was obtained as a colorless oil in 57% yield (27.8 mg). **<sup>1</sup>H NMR (400 MHz,**

**CDCl<sub>3</sub>**)  $\delta$  7.75 (d,  $J$  = 7.7 Hz, 1H), 7.65 – 7.59 (m, 1H), 7.52 (d,  $J$  = 7.7 Hz, 1H), 7.41 (t,  $J$  = 7.4 Hz, 1H), 3.82 – 3.76 (m, 1H), 2.98 (dd,  $J$  = 19.2, 7.7 Hz, 1H), 2.82 (dd,  $J$  = 15.6, 5.1 Hz, 1H), 2.52 – 2.46 (m, 2H), 1.42 (s, 9H). **<sup>13</sup>C NMR (100 MHz, CDCl<sub>3</sub>)**  $\delta$  205.6, 170.9, 157.0, 136.9, 134.8, 127.9, 125.5, 123.7, 81.1, 43.2, 41.5, 34.7, 28.0. HRMS:  $m/z$ : [M + H]<sup>+</sup> calculated for C<sub>15</sub>H<sub>19</sub>O<sub>3</sub><sup>+</sup>: 247.1329, found 247.1328.

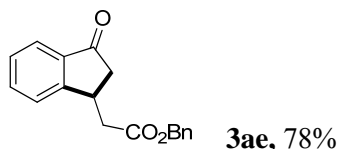

Product **3ae** was obtained as a colorless oil in 78% yield (43.5 mg). **<sup>1</sup>H NMR (400 MHz, CDCl<sub>3</sub>)**  $\delta$  7.74 (d,  $J$  = 7.6 Hz, 1H), 7.58 (t,  $J$  = 7.3 Hz, 1H), 7.45 (d,  $J$  = 7.7 Hz, 1H), 7.42 – 7.30 (m, 6H), 5.20 – 5.11 (m, 2H), 3.88 – 3.79 (m, 1H), 3.02 – 2.89 (m, 2H), 2.61 (dd,  $J$  = 16.0, 9.2 Hz, 1H), 2.44 (dd,  $J$  = 19.2, 3.3 Hz, 1H). **<sup>13</sup>C NMR (100 MHz, CDCl<sub>3</sub>)**  $\delta$  205.2, 171.6, 156.5, 136.8, 135.6, 134.9, 128.7, 128.5, 128.4, 128.1, 125.4, 123.8, 66.7, 43.3, 40.4, 34.6. HRMS:  $m/z$ : [M + H]<sup>+</sup> calculated for C<sub>18</sub>H<sub>17</sub>O<sub>3</sub><sup>+</sup>: 281.1172, found 281.1172.

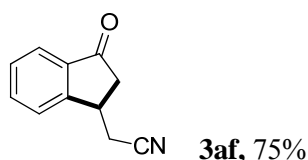

Product **3af** was obtained as a yellow oil in 75% yield (25.6 mg). **<sup>1</sup>H NMR (400 MHz, CDCl<sub>3</sub>)**  $\delta$  7.80 (d,  $J$  = 7.7 Hz, 1H), 7.72 – 7.64 (m, 2H), 7.52 – 7.47 (m, 1H), 3.80 – 3.74 (m, 1H), 3.05 (dd,  $J$  = 19.1, 7.8 Hz, 1H), 2.85 – 2.72 (m, 2H), 2.51 (dd,  $J$  = 19.1, 3.4 Hz, 1H). **<sup>13</sup>C NMR (100 MHz, CDCl<sub>3</sub>)**  $\delta$  203.2, 154.0, 136.8, 135.4, 129.0, 125.4, 124.1, 117.7, 42.5, 34.5, 23.8. HRMS:  $m/z$ : [M + H]<sup>+</sup> calculated for C<sub>11</sub>H<sub>10</sub>NO<sup>+</sup>: 172.0757, found 172.0755.

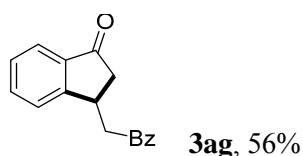

Product **3ag** was obtained as a colorless oil in 56% yield (27.9 mg). **<sup>1</sup>H NMR (400 MHz, CDCl<sub>3</sub>)**  $\delta$  7.99 – 7.95 (m, 2H), 7.77 (d,  $J$  = 7.6 Hz, 1H), 7.64 – 7.53 (m, 3H), 7.49 – 7.45 (m, 2H), 7.41 (t,  $J$  = 7.4 Hz, 1H), 4.09 – 4.03 (m, 1H), 3.57 (dd,  $J$  = 17.8, 4.8 Hz, 1H), 3.25 (dd,  $J$  = 17.8, 9.1 Hz, 1H), 3.12 (dd,  $J$  = 19.3, 7.7 Hz, 1H), 2.36 (dd,  $J$  = 19.3, 3.3 Hz, 1H). **<sup>13</sup>C NMR (100 MHz, CDCl<sub>3</sub>)**  $\delta$  205.7, 198.1, 157.6, 136.9, 136.6, 134.9, 133.5, 128.8, 128.1, 127.9, 125.7, 123.8, 45.3, 44.0, 33.7. HRMS: [M+H]<sup>+</sup> calculated for C<sub>17</sub>H<sub>15</sub>O<sub>2</sub><sup>+</sup>: 251.1067, found 251.1068.

#### IV. Mechanistic Studies

##### H/D Exchange Experiment of the Coupling Reaction between **1a** and Ethyl Acrylate **2a**.

To a mixture of **1a** (0.2 mmol), CsOAc (0.4 mmol), Cu(OAc)<sub>2</sub> (0.42 mmol), [Cp<sup>\*</sup>RhCl<sub>2</sub>]<sub>2</sub> (2 mol %), and AgSbF<sub>6</sub> (10 mol %) in ethanol-*d*<sub>6</sub> (2 mL) was added ethyl acrylate **2a** (0.4 mmol)

under N<sub>2</sub> atmosphere. The reaction mixture was stirred at 120 °C for 18 h. After that, the solvent was removed under reduced pressure and the residue was purified by silica gel chromatography using PE/EA to afford colorless oil product, which was characterized by <sup>1</sup>H NMR spectroscopy.

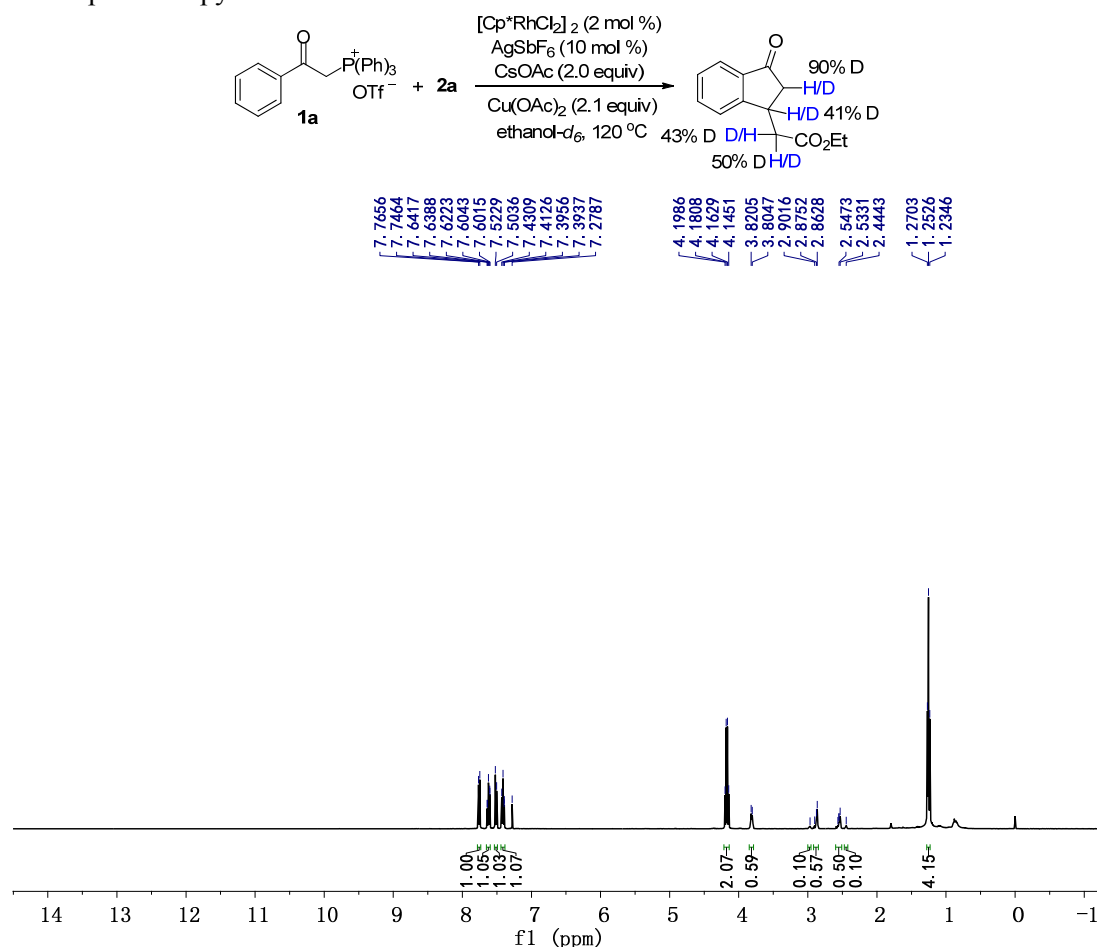

**Post-Coupling H/D Exchange Experiment of the Product **3aa**.** A control experiment was conducted to exclude the H/D exchange originating from post-coupling H/D exchange. A mixture of **3aa** (0.1 mmol), CsOAc (0.4 mmol), Cu(OAc)<sub>2</sub> (0.42 mmol), [Cp\*RhCl<sub>2</sub>]<sub>2</sub> (2 mol %), AgSbF<sub>6</sub> (10 mol %) in ethanol-*d*<sub>6</sub> (1 mL) was stirred at 120 °C for 18 h under N<sub>2</sub> atmosphere. Then the solvent was removed under vacuum and the residue was purified by silica gel chromatography. The product was characterized by <sup>1</sup>H NMR spectroscopy.

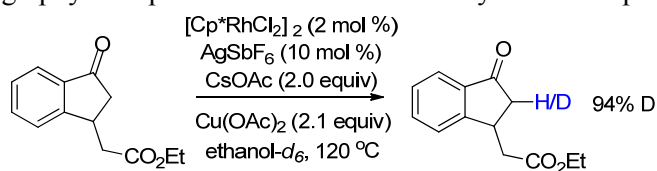

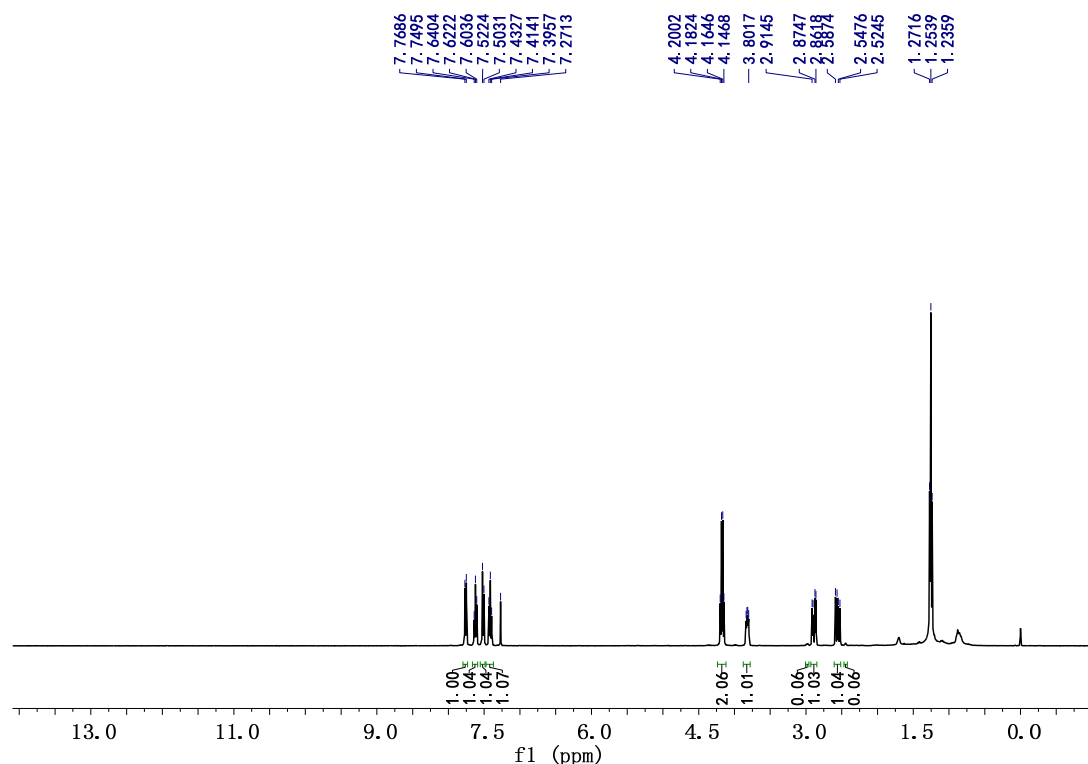

**Measurement of Kinetic Isotope Effect (Parallel Reactions).** Two pressure tubes were separately charged with **1a** (0.24 mmol) and **1a-d<sub>5</sub>** (0.24 mmol). To each tube was added [Cp\*RhCl<sub>2</sub>]<sub>2</sub> (2 mol %), AgSbF<sub>6</sub> (10 mol %), CsOAc (0.4 mmol), Cu(OAc)<sub>2</sub> (0.42 mmol), ethyl acrylate **2a** (0.2 mmol), and EtOH (2 mL) under N<sub>2</sub> atmosphere. The two reaction mixtures were stirred side by side in an oil bath preheated at 100 °C for 2 hour. After that, the reaction was cooled to 0 °C rapidly and was quenched with pentane. The two mixtures were combined and the solvent was removed under vacuum. The residue was purified by silica gel chromatography using PE/EA to afford a mixture of **3aa** and **3aa-d<sub>n</sub>** as a colorless oil (6.5 mg, 7% yield). The KIE value was determined to be  $k_H/k_D = 2.3$  on the basis of <sup>1</sup>H NMR analysis.

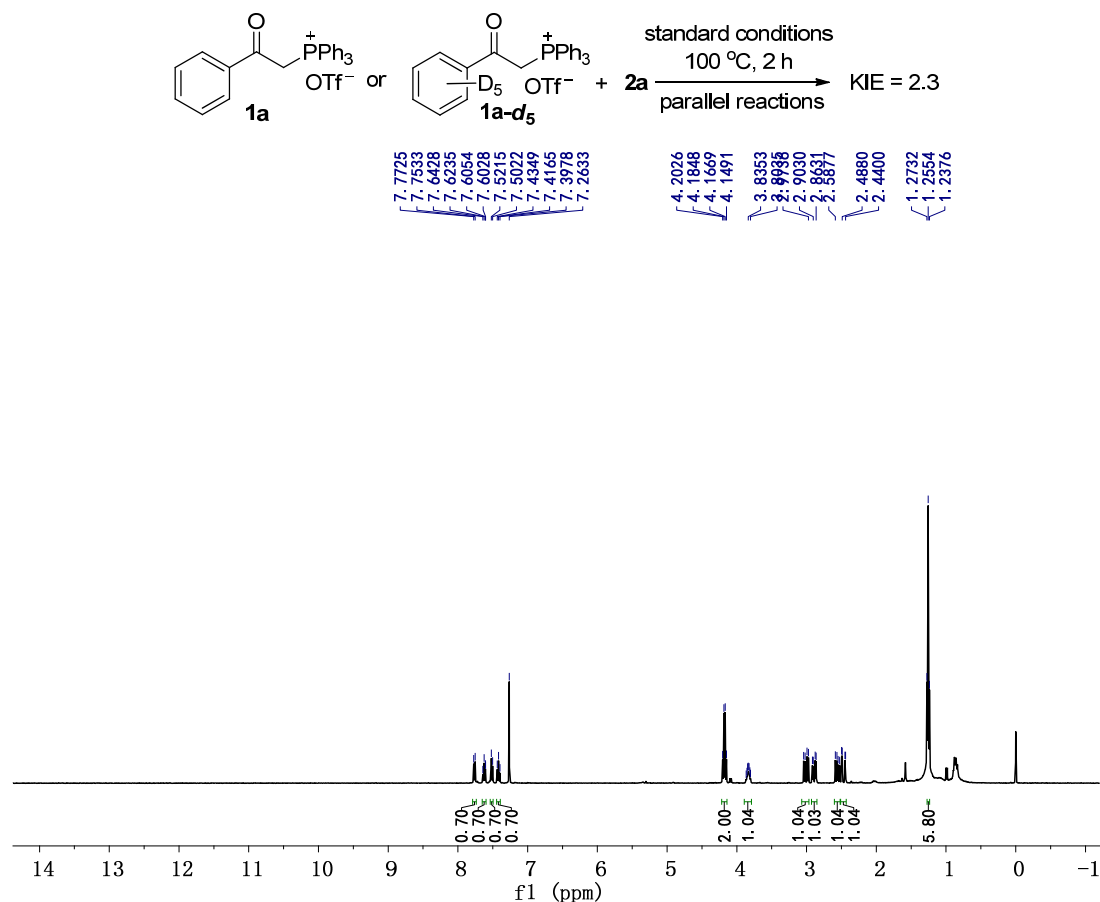

**Studies on a Possible Sequence of Phosphine Elimination-Oxidation.** To a pressure tube loaded with PPh<sub>3</sub> (0.1 mmol) was added H<sub>2</sub>O (5.0 equiv.) with or without ethyl acrylate **2a** under standard conditions at 100 °C for 18 h. After that, the reaction mixture was analyzed by GC-MS and <sup>31</sup>P NMR spectroscopy, and essentially no (<5%) O=PPh<sub>3</sub> was detected.

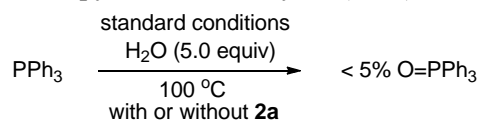

<sup>31</sup>P NMR Spectrum of the Product of Mixture without **2a**

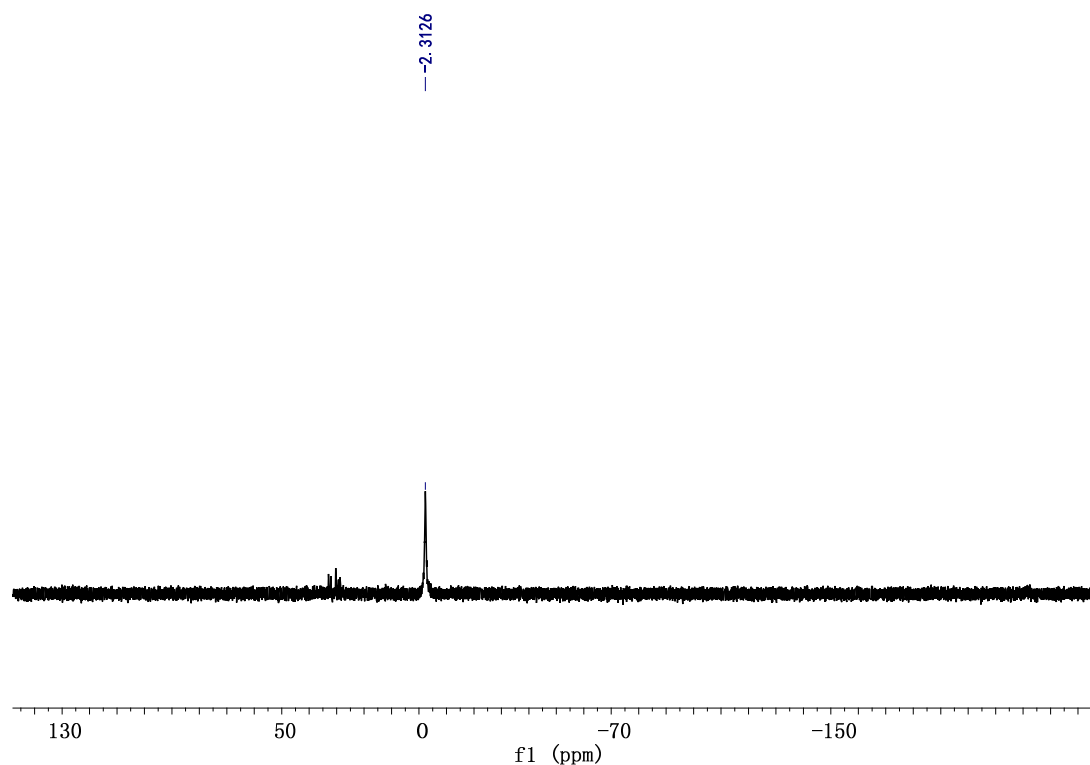

Two pressure tubes were both charged with phosphonium **1a** (0.2 mmol), and to one of the tube was added [Cp\*RhCl<sub>2</sub>]<sub>2</sub> (2 mol %), AgSbF<sub>6</sub> (10 mol %), CsOAc (0.4 mmol), Cu(OAc)<sub>2</sub> (0.42 mmol), and EtOH (2 mL) under N<sub>2</sub> atmosphere. To the other tube was added [Cp\*RhCl<sub>2</sub>]<sub>2</sub> (2 mol %), AgSbF<sub>6</sub> (10 mol %), CsOAc (0.4 mmol), and EtOH (2 mL) under N<sub>2</sub> atmosphere. The two reaction mixtures were stirred at 120 °C for 12 hour. After that, the reaction mixtures were characterized by <sup>31</sup>P NMR spectroscopy and GC-MS analysis. Phenacyl phosphonium salt was mostly converted to O=PPh<sub>3</sub> even without Cu(OAc)<sub>2</sub>.

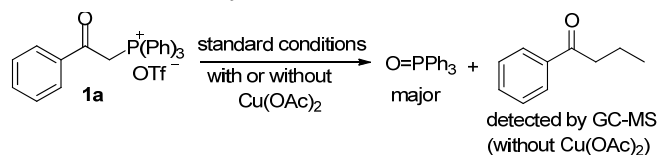

$^{31}\text{P}$  NMR Spectra of the Mixture Obtained with  $\text{Cu}(\text{OAc})_2$

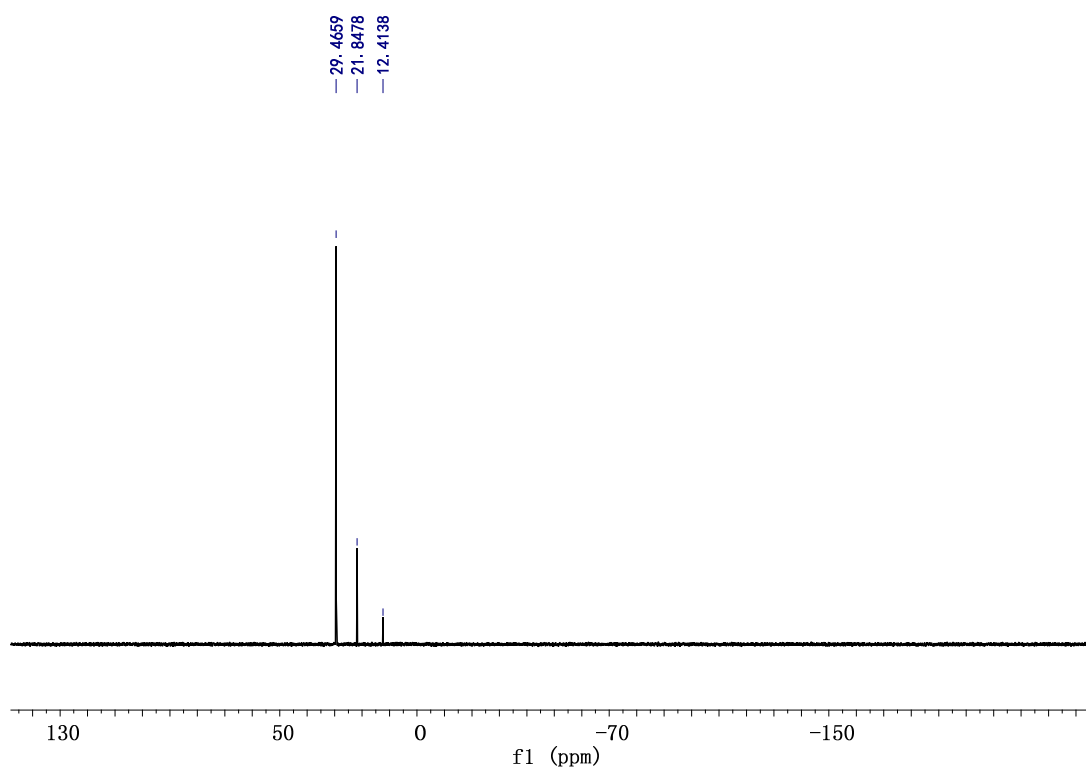

$^{31}\text{P}$  NMR Spectra of the Mixture Obtained without  $\text{Cu}(\text{OAc})_2$

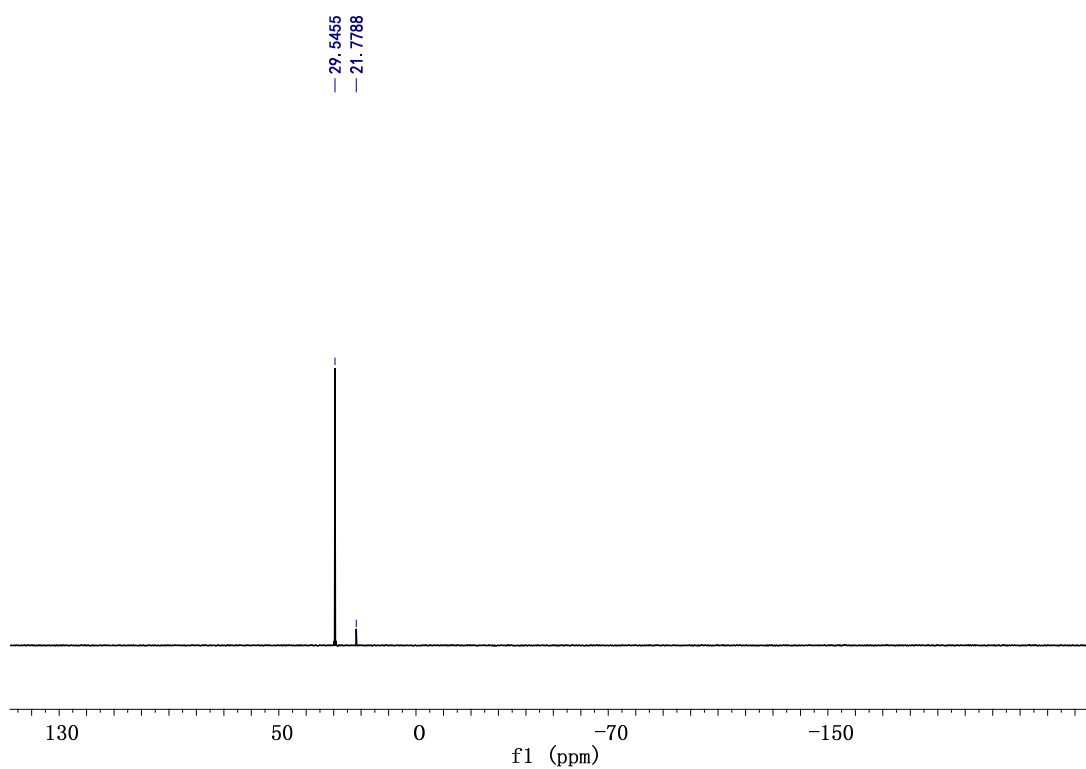

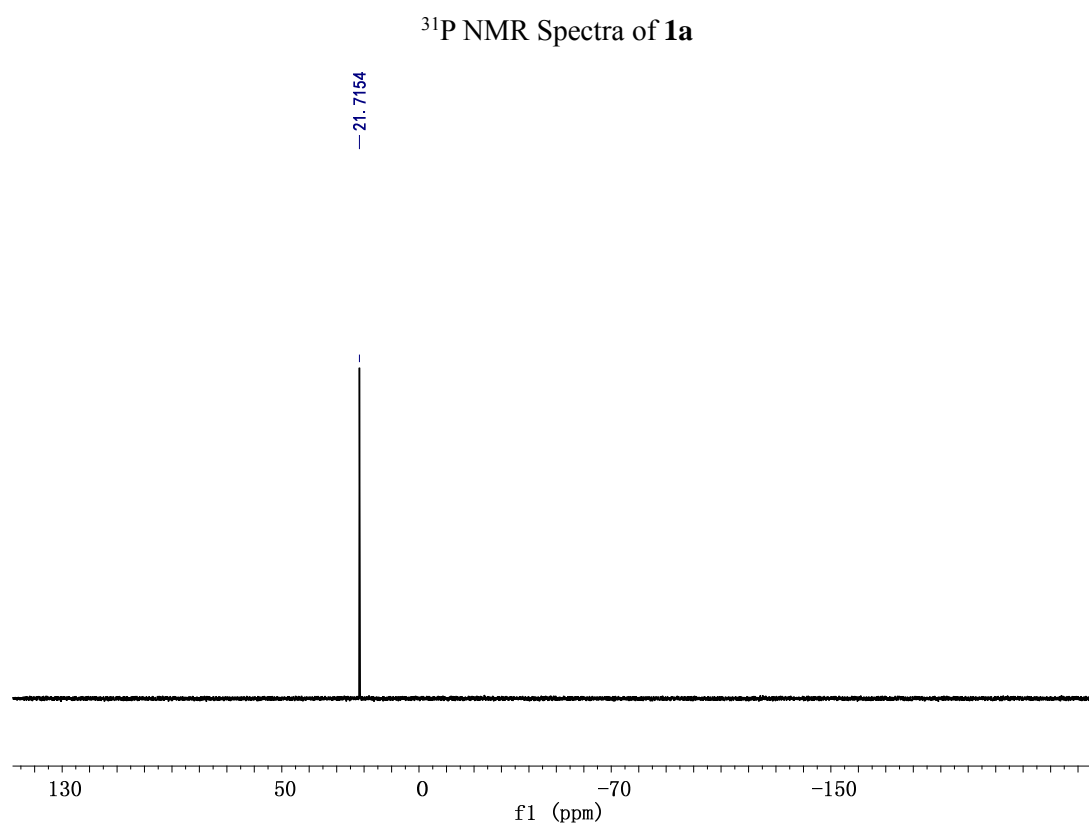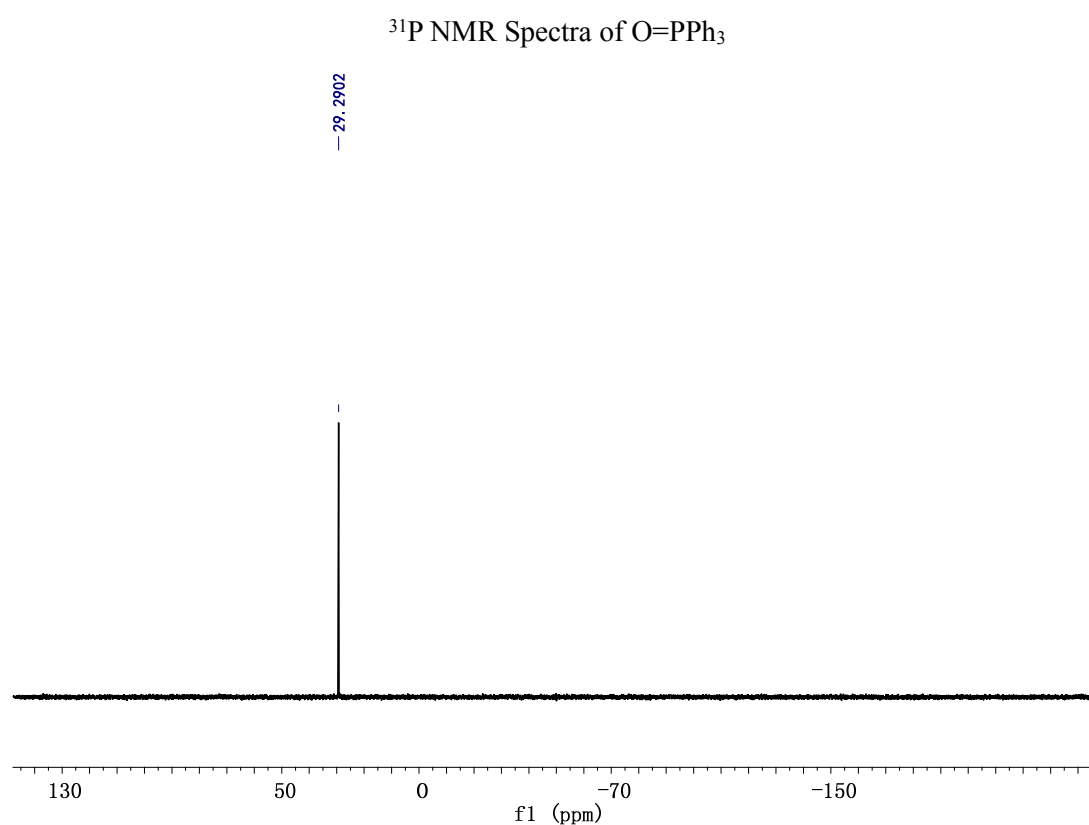

**Studies on the Possible Intermediacy of an Olefin.** A possible olefin intermediate **5** was prepared<sup>[2]</sup> and was subjected to the standard conditions. No conversion was detected by GC-MS.

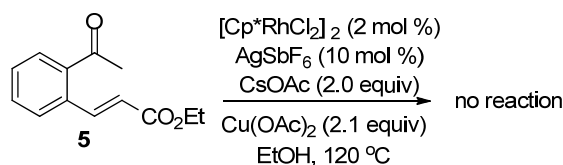

**$^1\text{H}$  NMR (400 MHz,  $\text{CDCl}_3$ )**  $\delta$  8.15 (d,  $J$  = 15.9 Hz, 1H), 7.75 (dd,  $J$  = 7.6, 1.2 Hz, 1H), 7.61 – 7.57 (m, 1H), 7.52 (td,  $J$  = 7.4, 1.1 Hz, 1H), 7.46 (td,  $J$  = 7.5, 1.4 Hz, 1H), 6.28 (d,  $J$  = 15.9 Hz, 1H), 4.27 (q,  $J$  = 7.1 Hz, 2H), 2.62 (s, 3H), 1.34 (t,  $J$  = 7.1 Hz, 3H).  **$^{13}\text{C}$  NMR (100 MHz,  $\text{CDCl}_3$ )**  $\delta$  200.9, 166.5, 143.9, 138.2, 134.8, 132.0, 129.4, 129.3, 128.4, 121.0, 60.6, 29.3, 14.3.

**$^{18}\text{O}$ -Labeling Experiments.** To a mixture of **1a** (0.2 mmol), NaOAc (0.4 mmol),  $\text{Cu}(\text{OAc})_2$  (0.42 mmol),  $[\text{Cp}^*\text{RhCl}_2]_2$  (2 mol %), and  $\text{AgSbF}_6$  (10 mol %) in EtOH (2 mL) was added ethyl acrylate (**2a**, 0.4 mmol) and  $\text{H}_2^{18}\text{O}$  (1 mmol) under  $\text{N}_2$  atmosphere. The reaction mixture was stirred at 120 °C for 18 h. After that, the solvent was removed under reduced pressure. The residue was characterized by HRMS analysis. The ratio of the  $^{18}\text{O}$ : $^{16}\text{O}$  in  $\text{O}=\text{PPh}_3$  was 58:42.

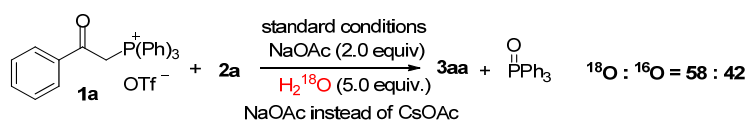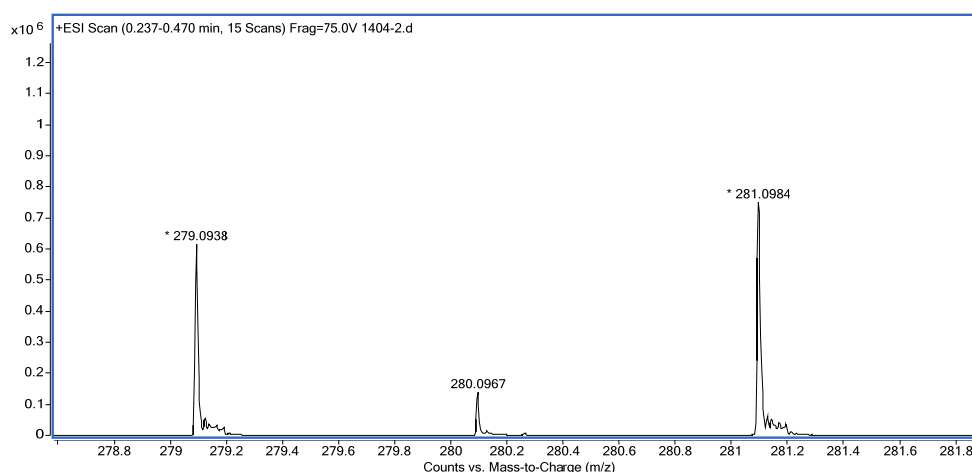

| m/z      | Abund    | Abund % | Area  | End      | Start    |
|----------|----------|---------|-------|----------|----------|
| 279.0938 | 616386.6 | 56.62   | 7830  | 279.1164 | 278.9914 |
| 280.0967 | 138694.5 | 12.74   | 1539  | 280.1204 | 280.0446 |
| 281.0984 | 761465.5 | 69.94   | 10797 | 281.1232 | 280.9919 |
| 282.101  | 169991.5 | 15.61   | 1902  | 282.1249 | 282.0343 |
| 282.279  | 59690.4  | 5.48    | 692   | 282.3032 | 282.2447 |

To a mixture of **1a** (0.1 mmol), NaOAc (0.2 mmol),  $\text{Cu}(\text{OAc})_2$  (0.21 mmol),  $[\text{Cp}^*\text{RhCl}_2]_2$  (2 mol %),  $\text{AgSbF}_6$  (10 mol %) in  $\text{Et}^{18}\text{OH}/\text{EtOH}$  (1:1.5, 1 mL in total) was added ethyl acrylate **2a** (0.2 mmol) under  $\text{N}_2$  atmosphere. The reaction mixture was stirred at 120 °C for 18 h. The reaction mixture was characterized by HRMS analysis. The ratio of the  $^{18}\text{O}$ : $^{16}\text{O}$  in  $\text{O}=\text{PPh}_3$  was 18:82.

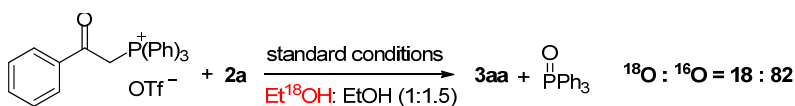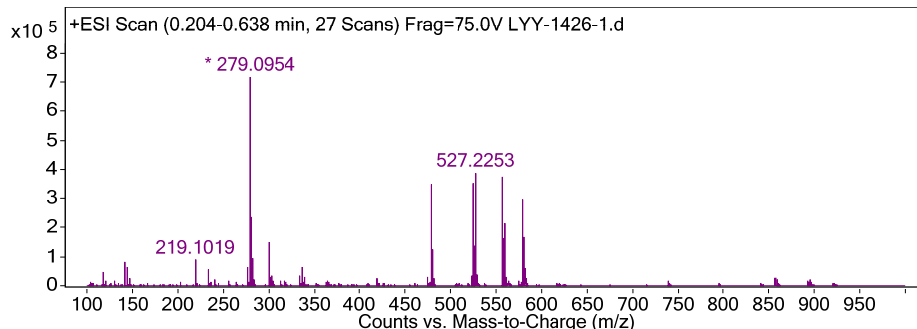

| m/z      | Abund    | Abund % | Area  | End      | Start    |
|----------|----------|---------|-------|----------|----------|
| 277.1146 | 68399.2  | 9.43    | 779   | 277.1389 | 277.052  |
| 279.0954 | 725356.4 | 100     | 13515 | 279.1211 | 278.999  |
| 279.1881 | 51057.8  | 7.04    | 854   | 279.1997 | 279.1764 |
| 280.0973 | 200680.8 | 27.67   | 2327  | 280.1193 | 280.0144 |
| 281.0985 | 237372.1 | 32.72   | 2789  | 281.1221 | 281.0229 |
| 282.1014 | 45015.4  | 6.21    | 543   | 282.1267 | 281.9777 |
| 282.2794 | 94922    | 13.09   | 1067  | 282.3021 | 282.2407 |
| 301.076  | 154819   | 21.34   | 1850  | 301.0987 | 301.0172 |

To a mixture of **1a** (0.2 mmol), Na<sup>18</sup>OAc (0.8 mmol), Cu(OAc)<sub>2</sub> (0.42 mmol), [Cp\*RhCl<sub>2</sub>]<sub>2</sub> (2 mol %), AgSbF<sub>6</sub> (10 mol %) in EtOH (2 mL) was added ethyl acrylate **2a** (0.4 mmol) under N<sub>2</sub> atmosphere. The reaction mixture was stirred at 120 °C for 18 h. The reaction mixture was characterized by HRMS analysis. Essentially no <sup>18</sup>O was incorporated.

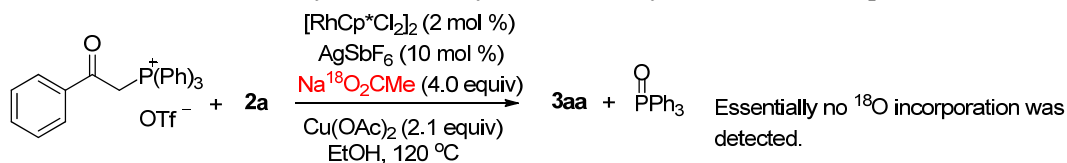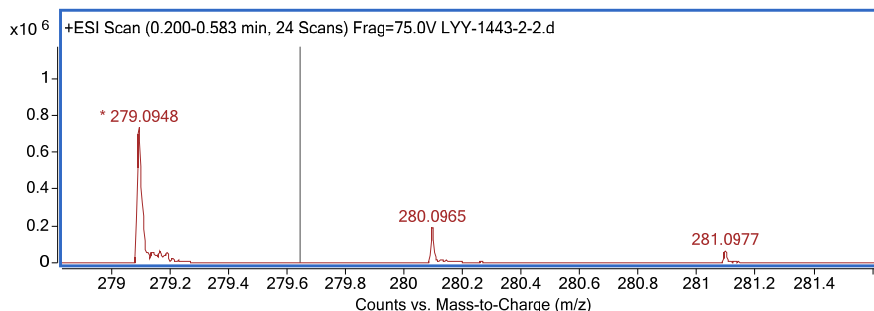

| m/z      | Abund    | Area  | End      | Start    |
|----------|----------|-------|----------|----------|
| 277.114  | 43828.7  | 523   | 277.1382 | 277.0831 |
| 279.0951 | 650907.8 | 12420 | 279.1204 | 278.9896 |
| 280.0969 | 175298.8 | 2140  | 280.1185 | 280.034  |
| 281.0983 | 62120.1  | 763   | 281.1213 | 281.063  |
| 282.2788 | 52635.4  | 629   | 282.3014 | 282.2283 |
| 288.1387 | 308379.9 | 3914  | 288.1617 | 288.0849 |
| 289.1415 | 68930.8  | 851   | 289.164  | 289.1078 |

To a mixture of O=PPh<sub>3</sub> (0.2 mmol), [Cp\*RhCl<sub>2</sub>]<sub>2</sub> (2 mol %), AgSbF<sub>6</sub> (10 mol %), NaOAc (0.4 mmol), Cu(OAc)<sub>2</sub> (0.42 mmol) in EtOH (2 mL) was added H<sub>2</sub><sup>18</sup>O (1 mmol) at 120 °C for 18 h. The reaction mixture was characterized by HRMS analysis. No <sup>18</sup>O-labeled was detected.

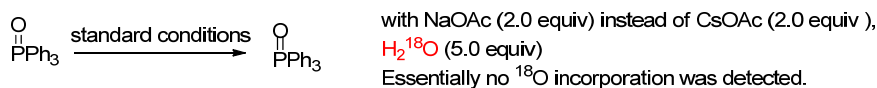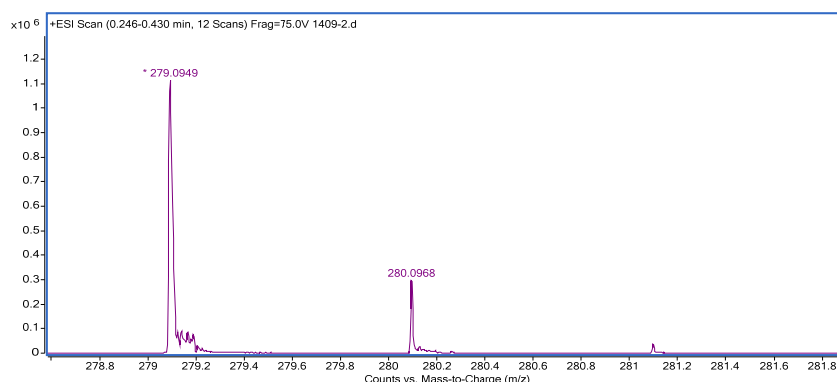

| m/z      | Abund     | Abund % | Area  | End      | Start    |
|----------|-----------|---------|-------|----------|----------|
| 146.9802 | 94679.3   | 8.25    | 668   | 146.9971 | 146.9507 |
| 279.0949 | 1120694.4 | 97.69   | 20506 | 279.1205 | 278.9926 |
| 279.1876 | 76357.8   | 6.66    | 1285  | 279.2019 | 279.1758 |
| 280.0968 | 308432.4  | 26.89   | 3474  | 280.1186 | 280.0283 |
| 301.0765 | 959399    | 83.63   | 16457 | 301.1008 | 300.9438 |
| 301.173  | 57691.1   | 5.03    | 1003  | 301.1854 | 301.1612 |

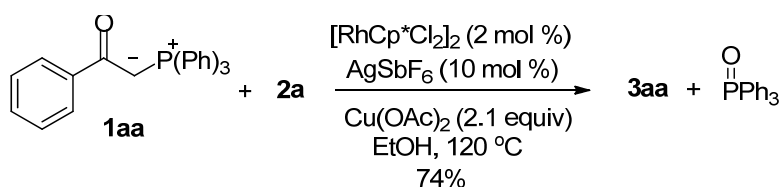

To a mixture of 1-phenyl-2-(triphenylphosphoranylidene)ethanone **1aa** (the ylidic form of **1a**, 0.2 mmol), [Cp\*RhCl<sub>2</sub>]<sub>2</sub> (2 mol%), AgSbF<sub>6</sub> (10 mol%), and Cu(OAc)<sub>2</sub> (0.42 mmol) in EtOH (2 mL) was added ethyl acrylate **2a** (0.4 mmol) under N<sub>2</sub> atmosphere. The reaction mixture was stirred at 120 °C for 18 h. After that, the solvent was removed under reduced pressure and the residue was purified by silica gel chromatography using PE/EA to afford product **3aa** in

74% yield.

## V. Gram-scale Synthesis

Phenacyl phosphonium salts **1a** (5.0 mmol), [Cp\*RhCl<sub>2</sub>]<sub>2</sub> (1 mol %), AgSbF<sub>6</sub> (5 mol %), CsOAc (2.0 equiv), and Cu(OAc)<sub>2</sub> (2.1 equiv) were charged into a pressure tube. Ethanol (40 mL) was then added to this tube. The resulting mixture was stirred for seconds under N<sub>2</sub> atmosphere, to which ethyl acrylate (**2a**, 2.0 equiv) was added. The mixture was stirred at 120 °C for 18 hours. The solvent was then removed under vacuum and the residue was purified by silica gel chromatography using PE/EA (30:1 – 10:1) to afford product **3aa** as a colorless oil (0.74 g, 68%).

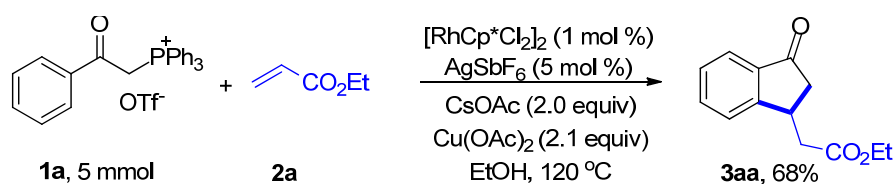

### Reference

- [1] (a) Nanteuil, F. D.; Loup, J.; Waser, J. *Org. Lett.* **2013**, *15*, 3738. (b) Xu, X.; Shabashov, D.; Zavalij, P. Y.; Doyle, M. P. *Org. Lett.* **2012**, *14*, 800. (c) Koduri, N. D.; Scott, H.; Hileman, B.; Cox, J. D.; Coffin, M.; Glicksberg, L.; Hussaini, S. R. *Org. Lett.* **2012**, *14*, 440.  
[2] Patureau, F.W.; Besset, T.; Glorius, F. *Angew. Chem. Int. Ed.* **2011**, *50*, 1064.

## VI. NMR Spectra

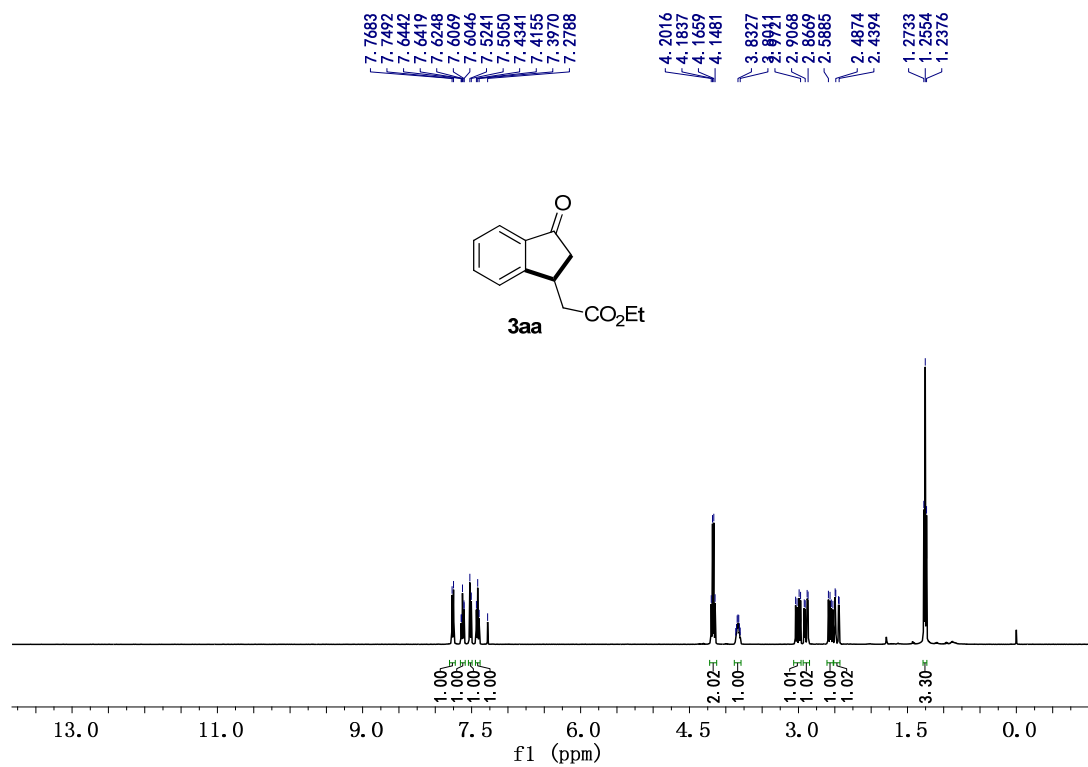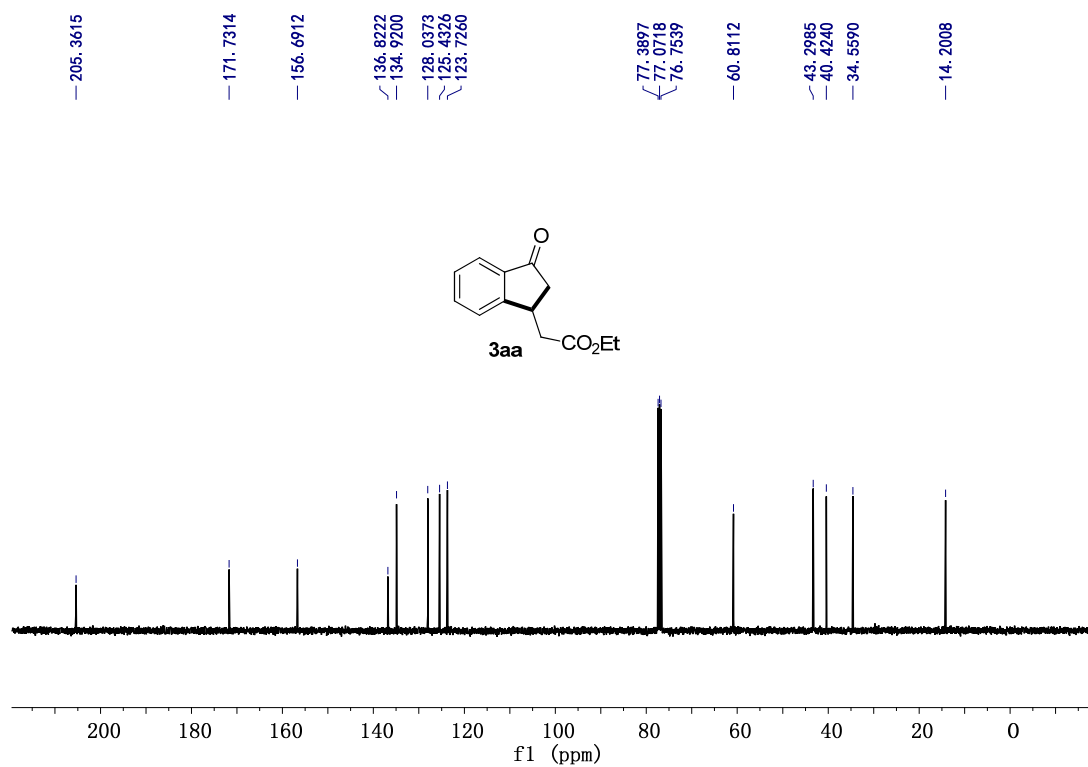

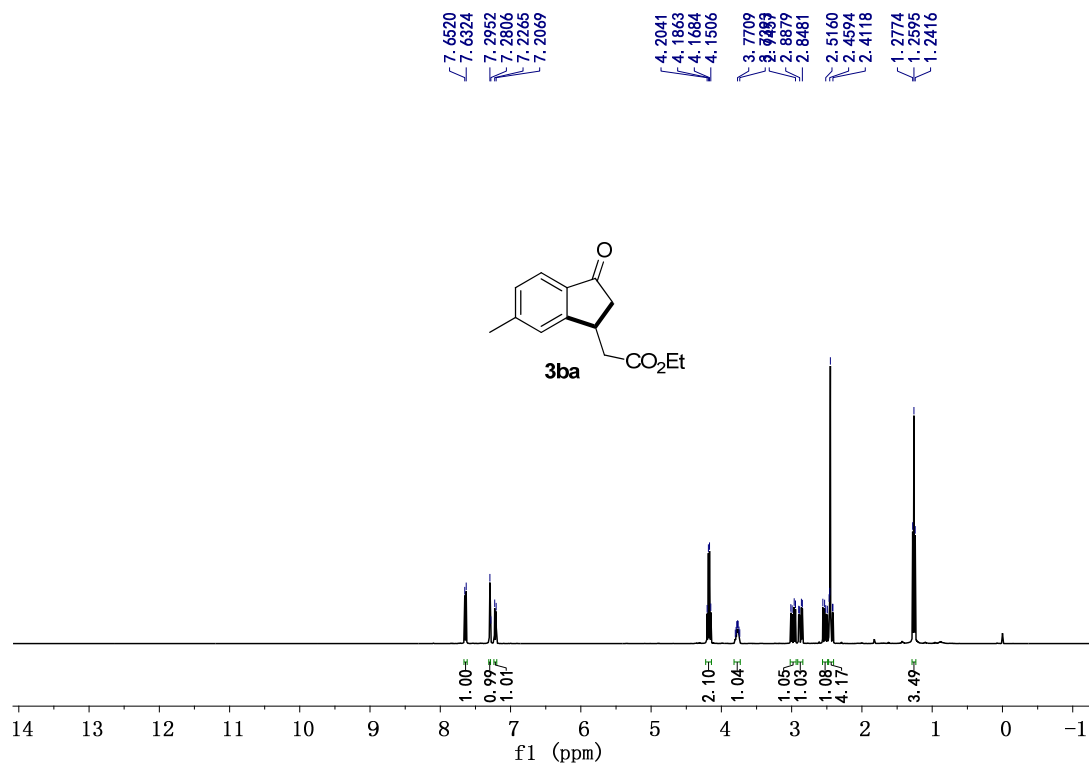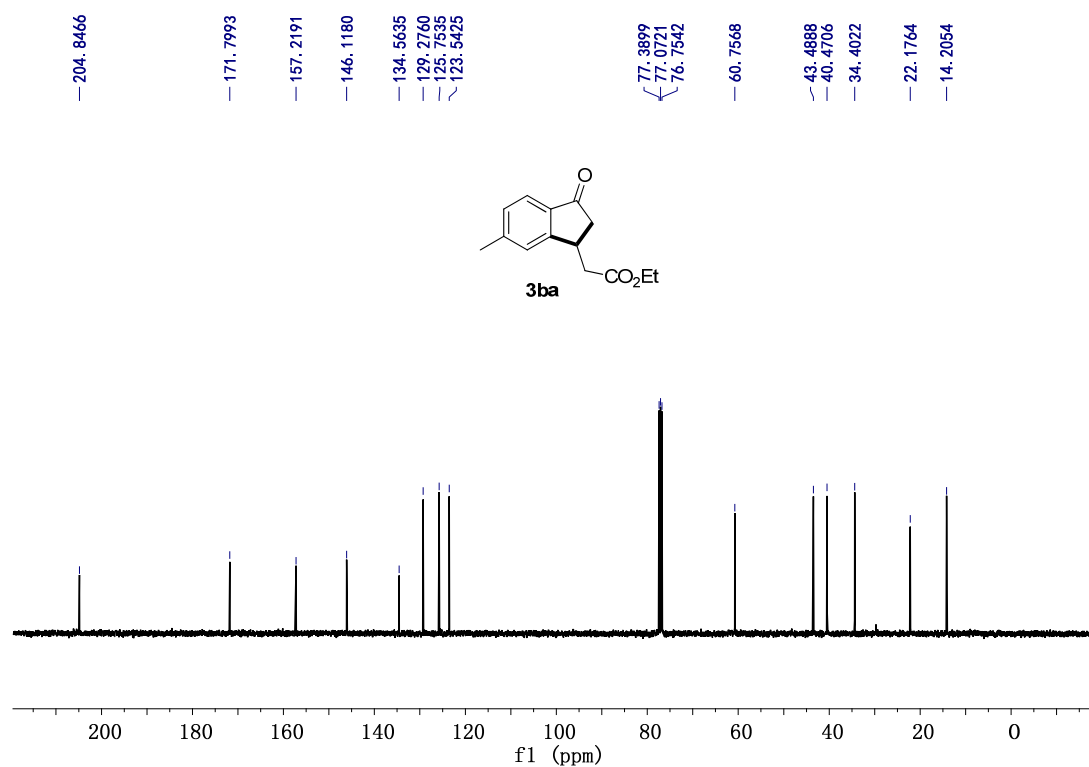

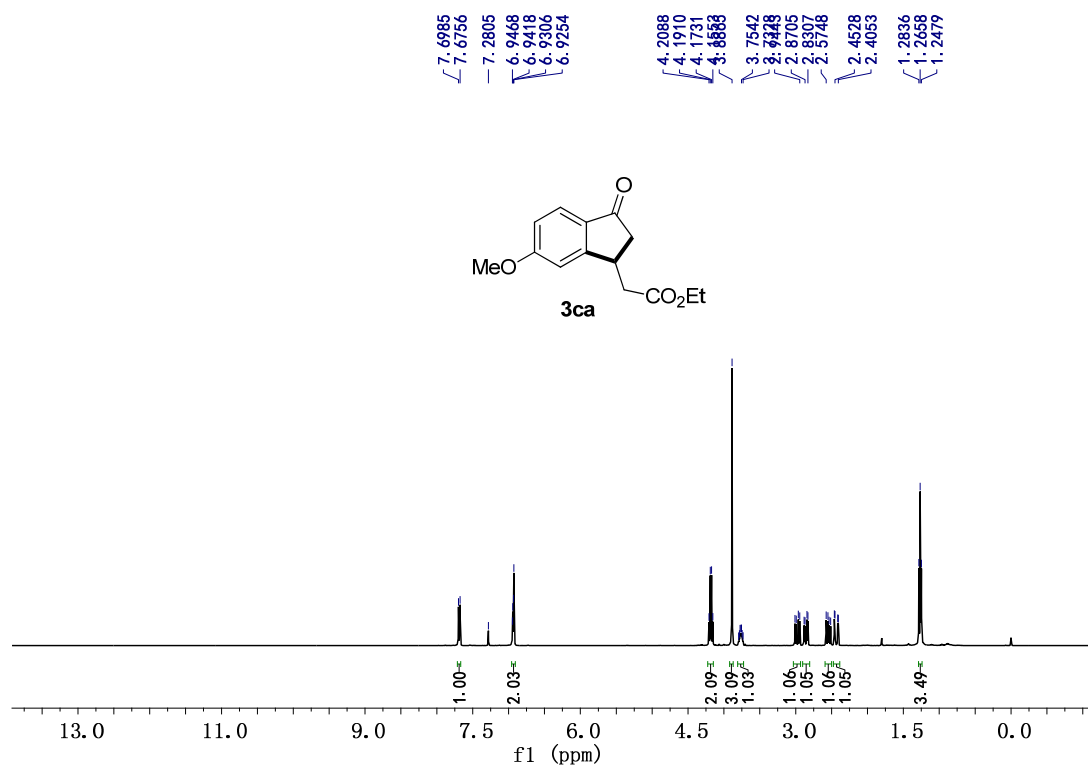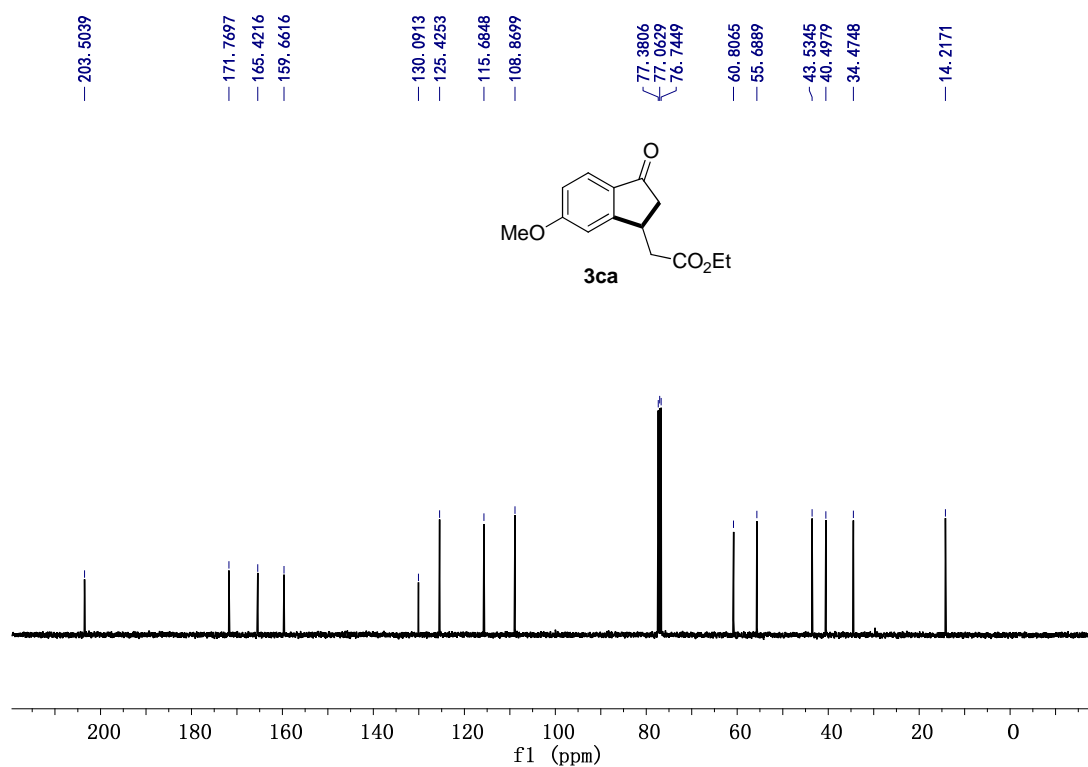

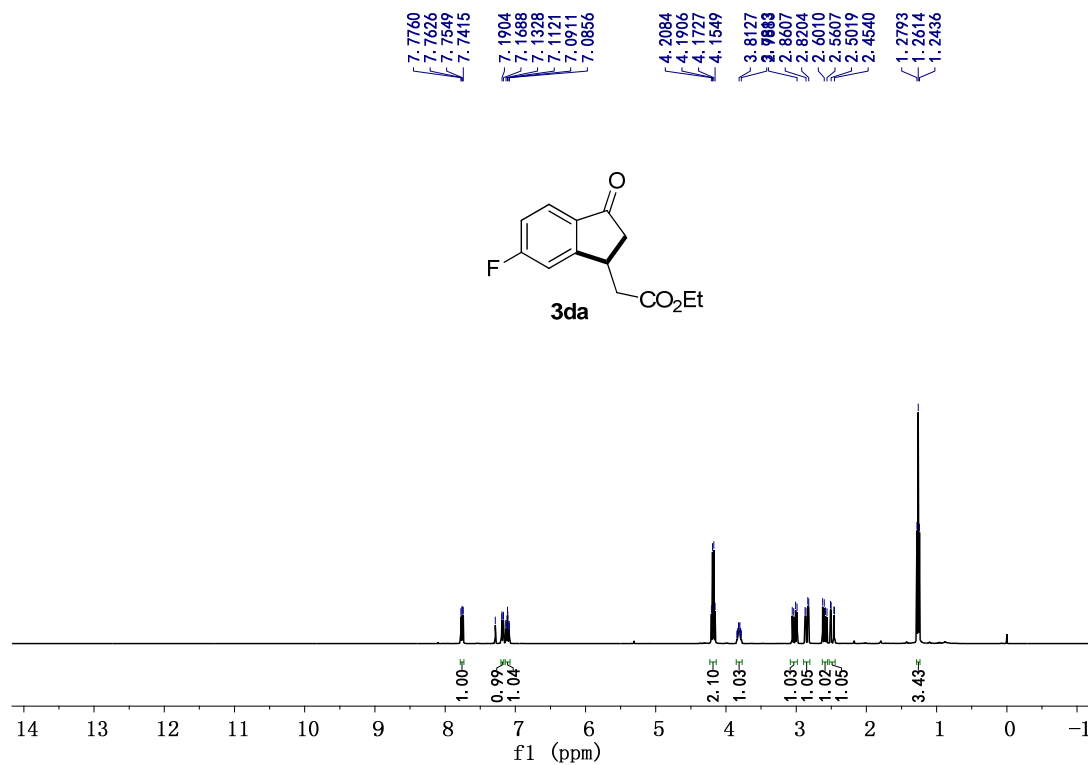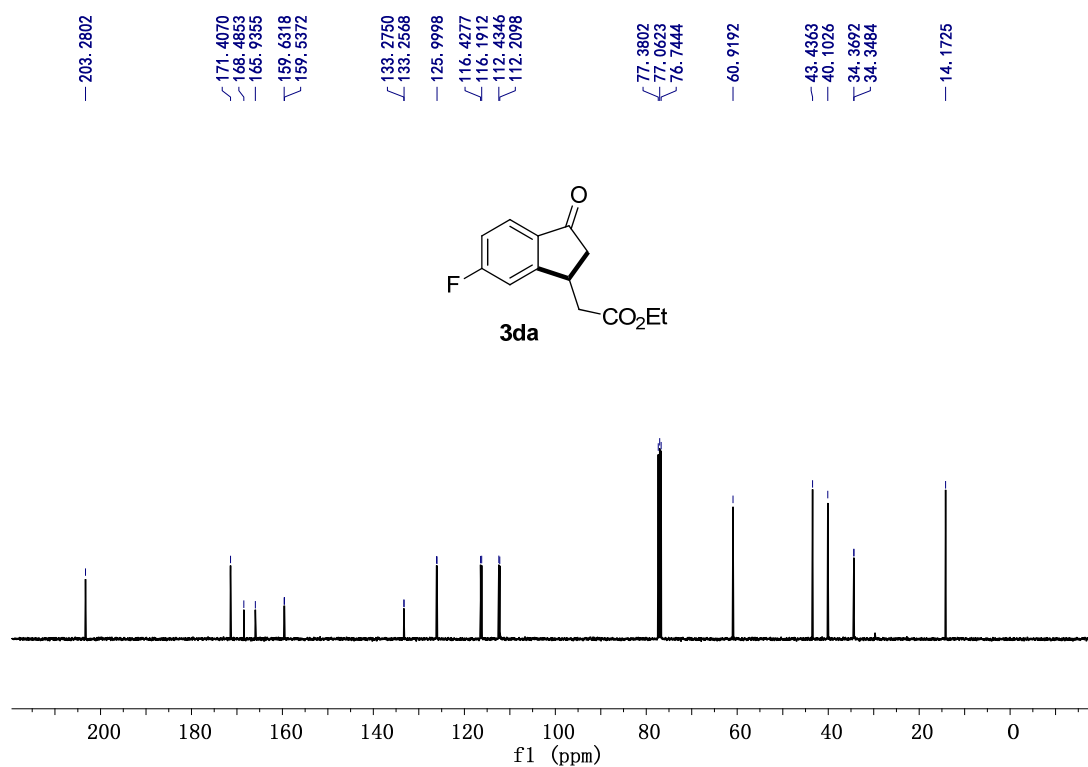

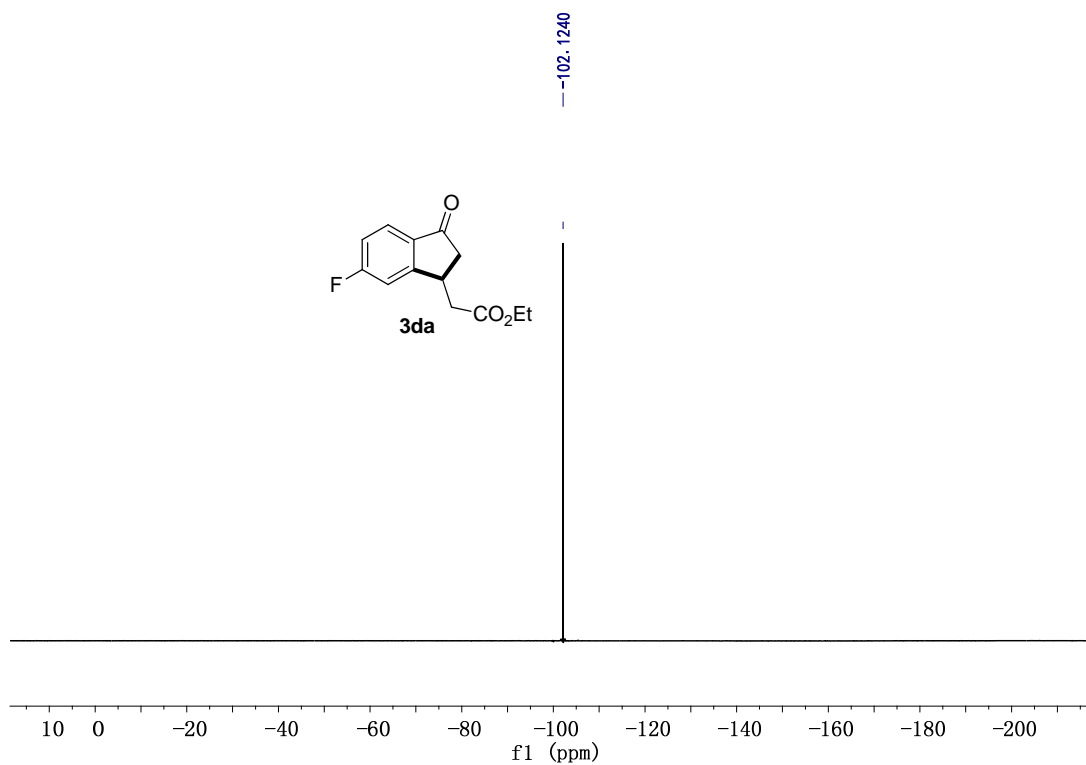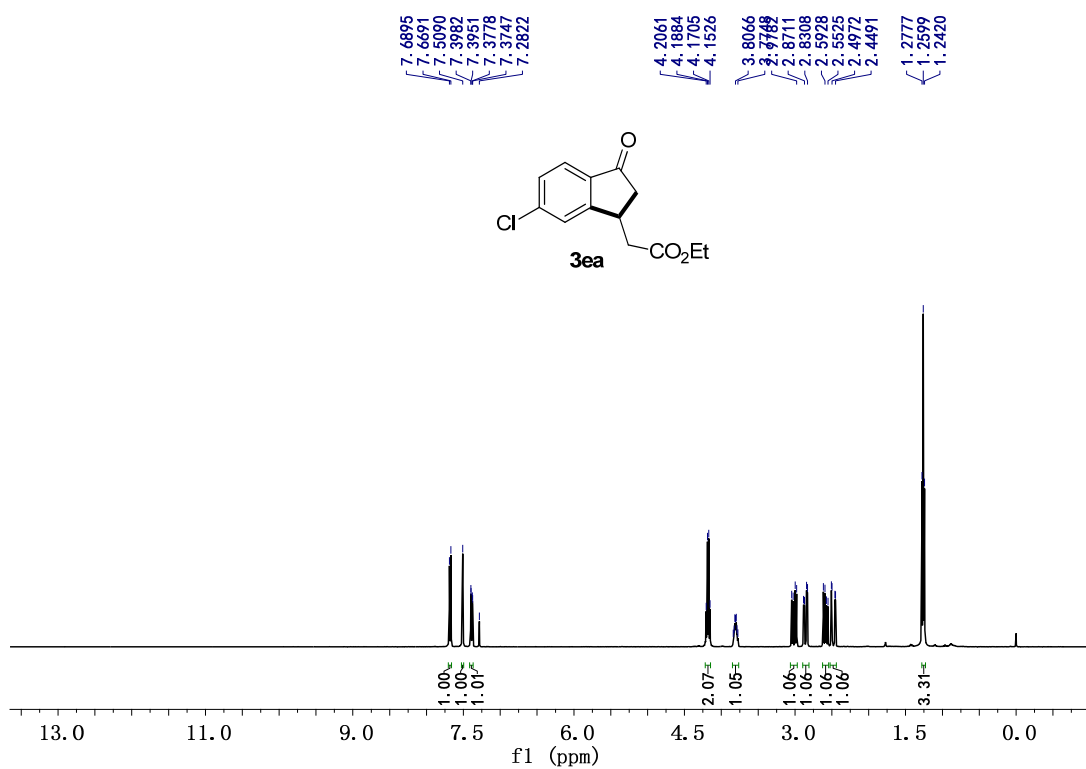

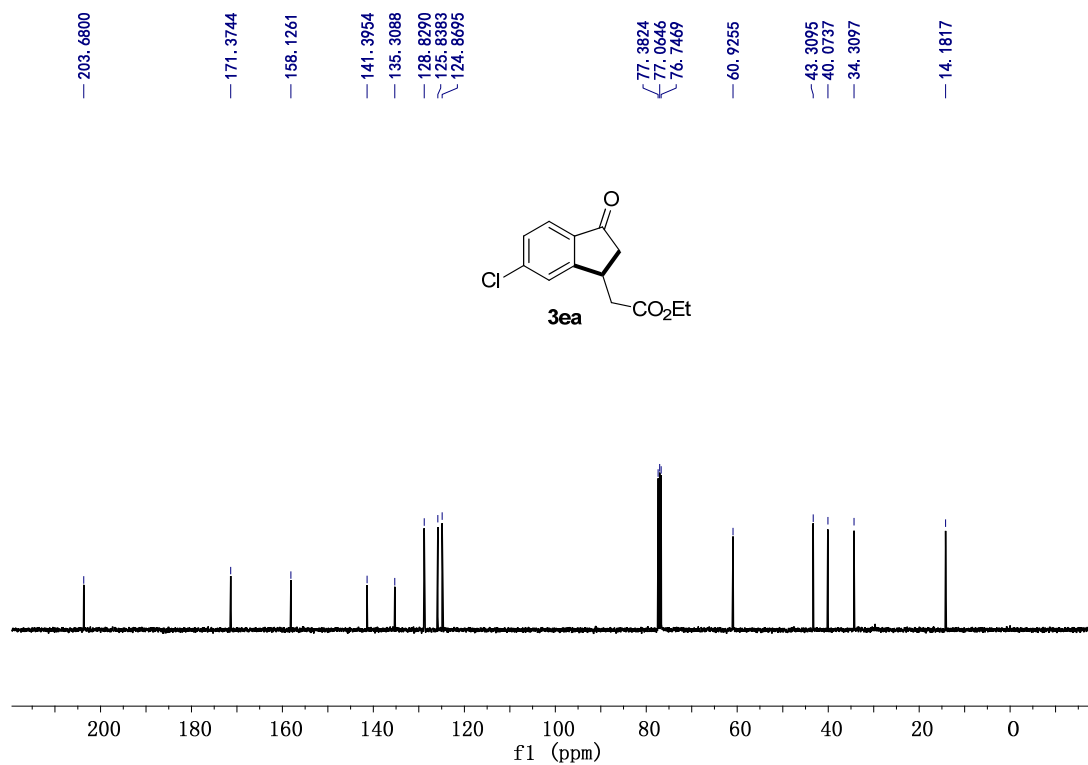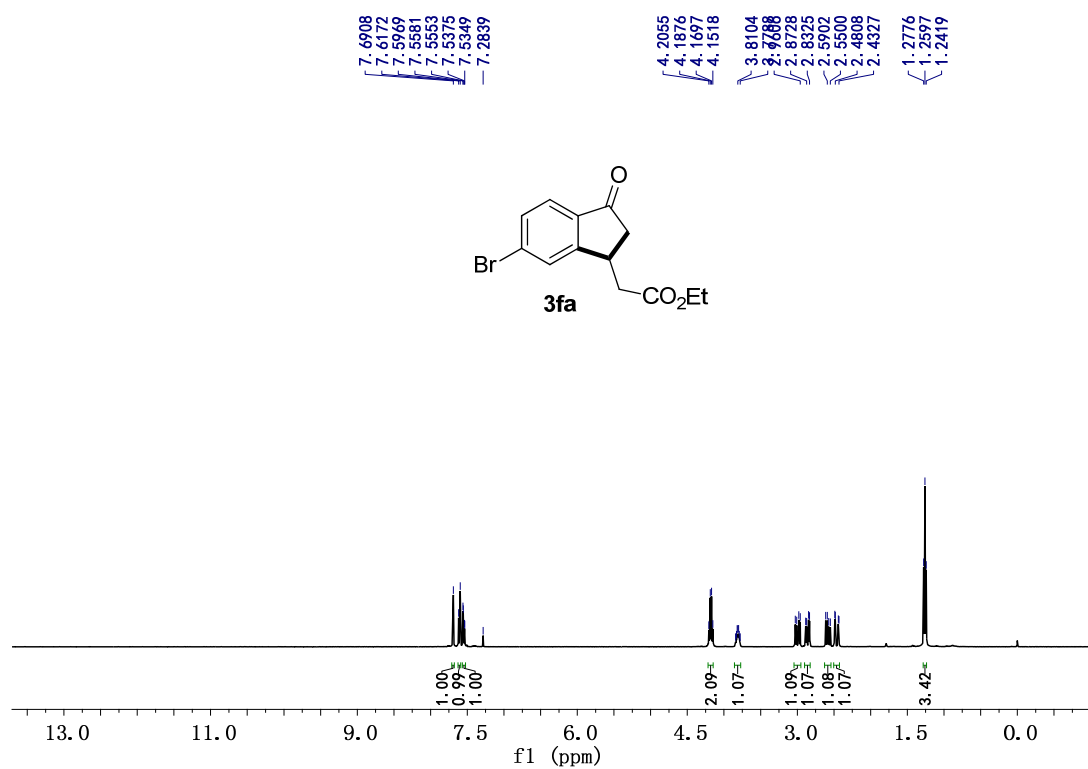

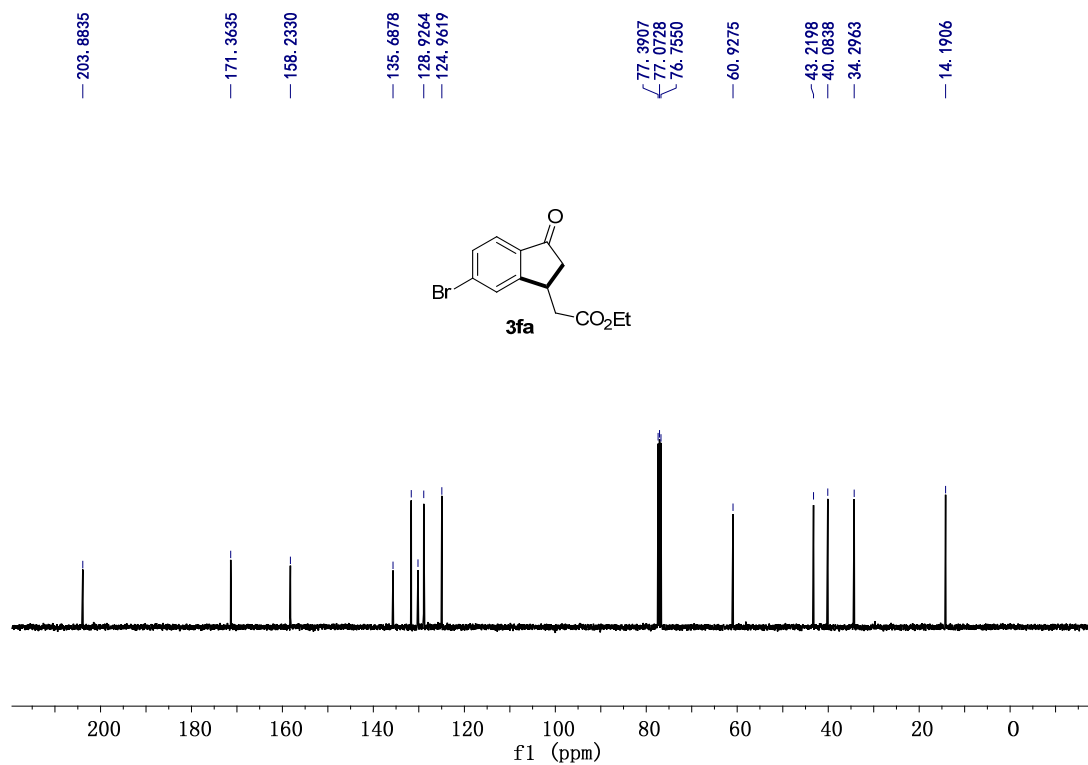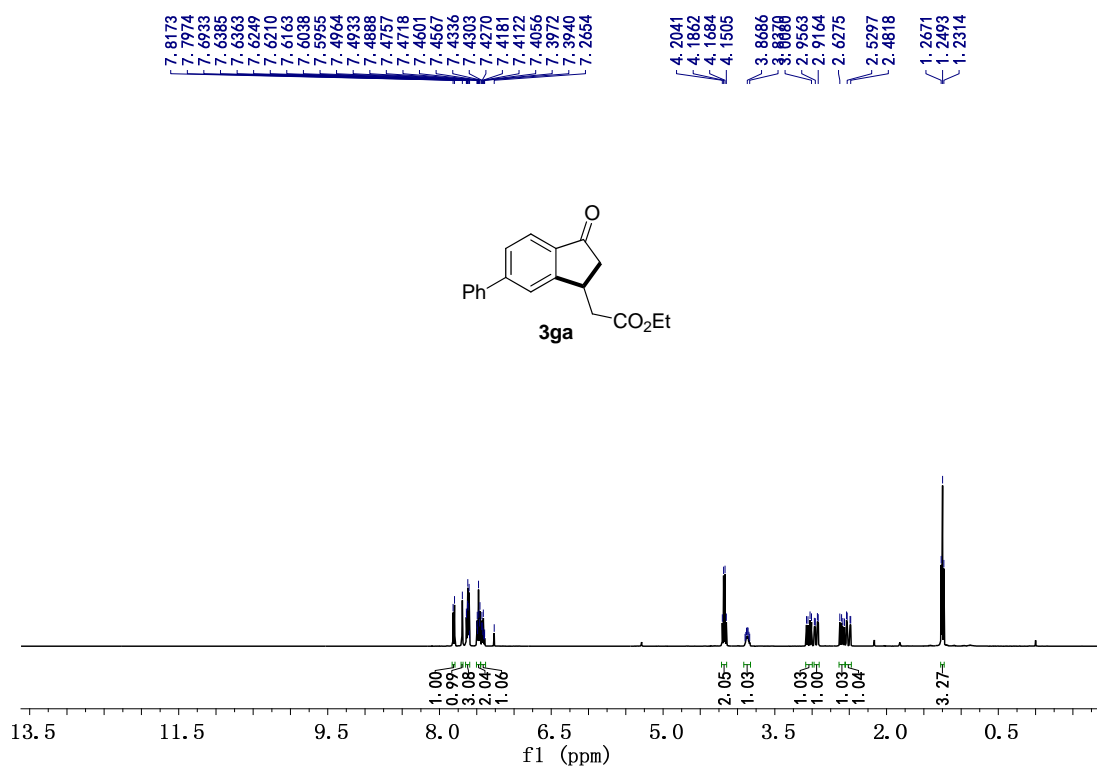

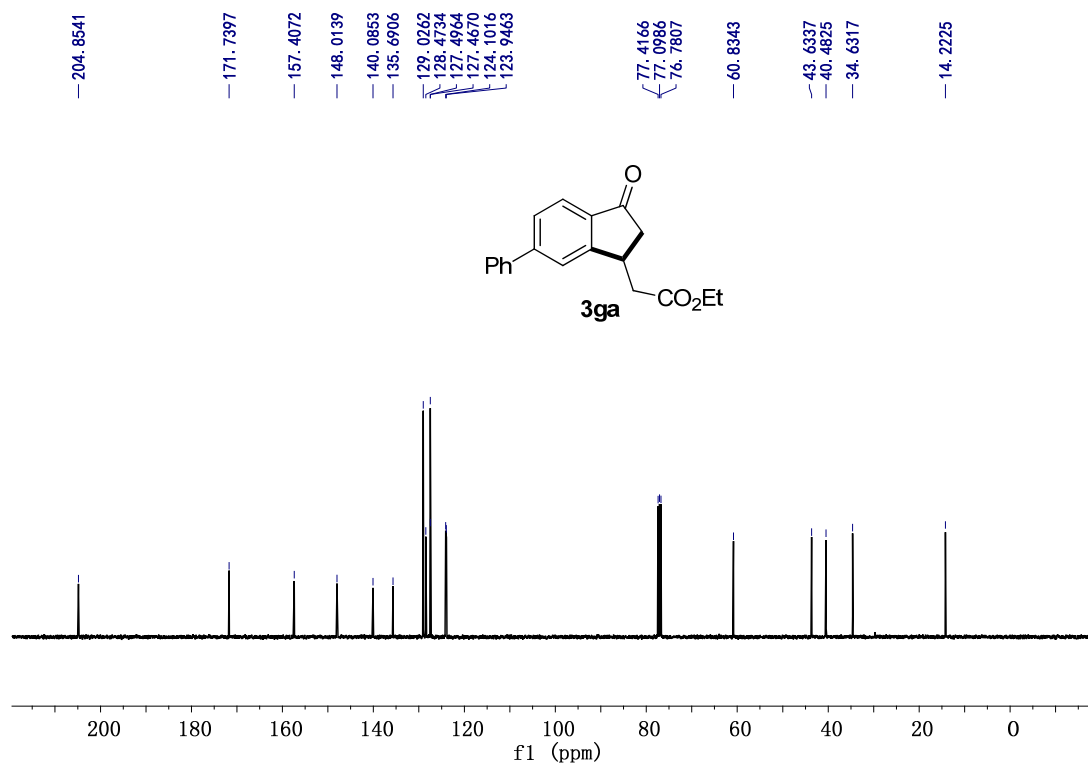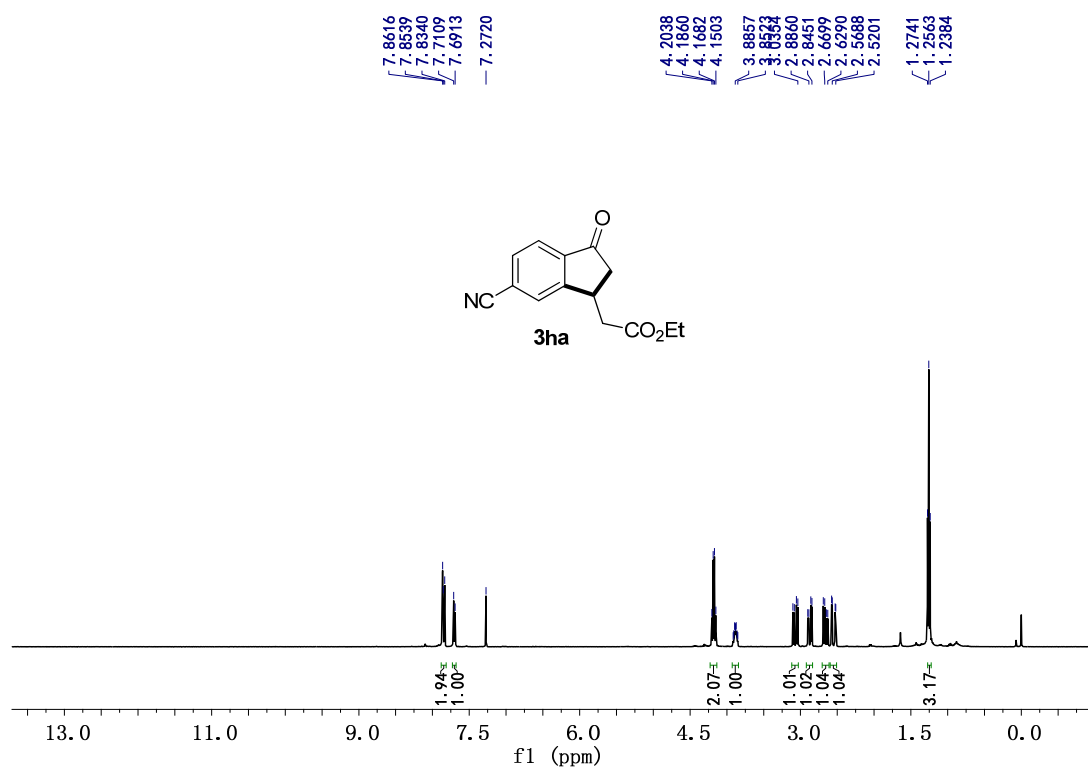

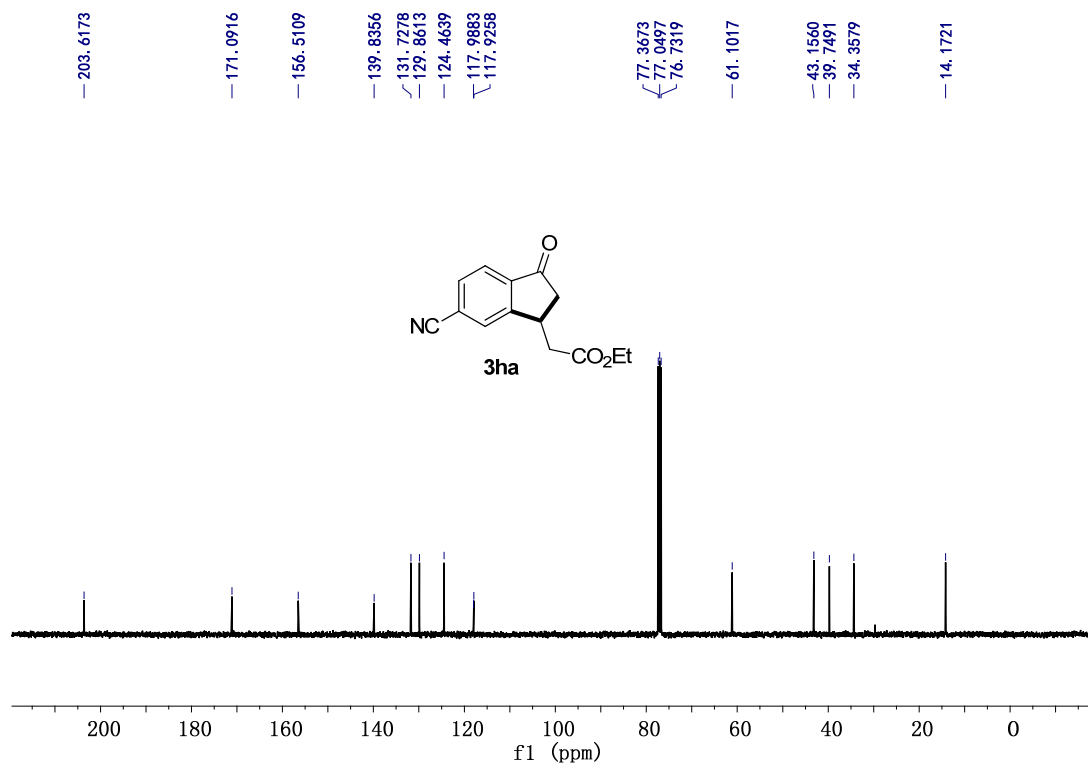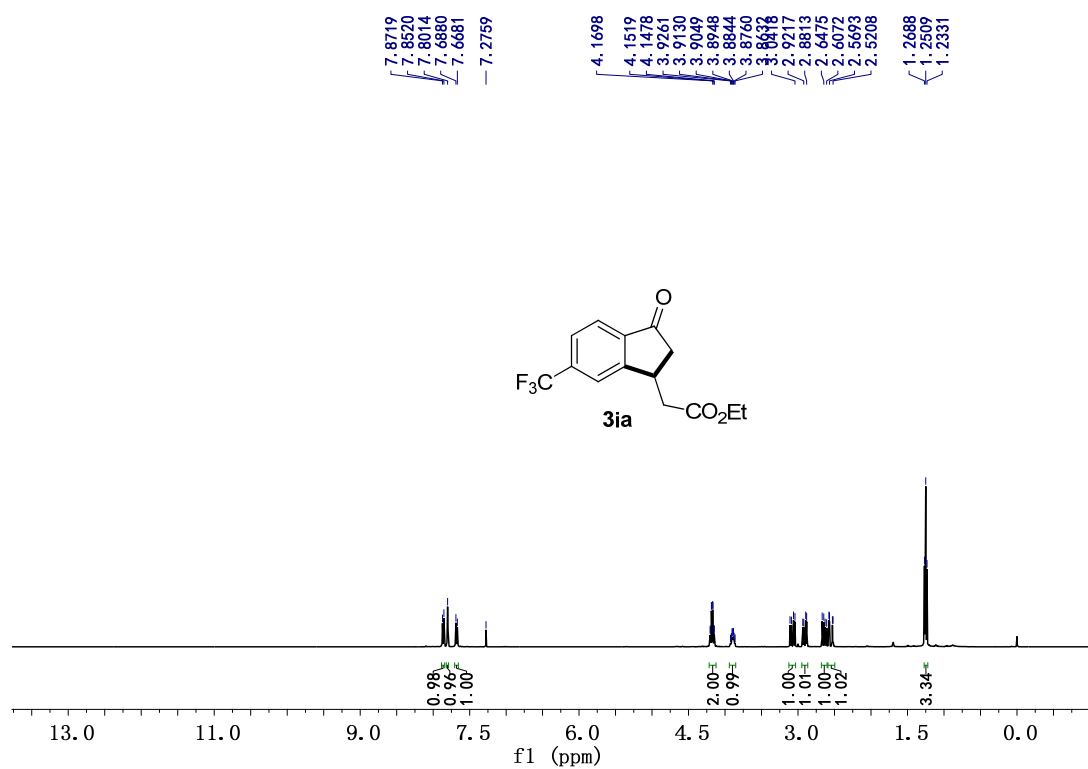

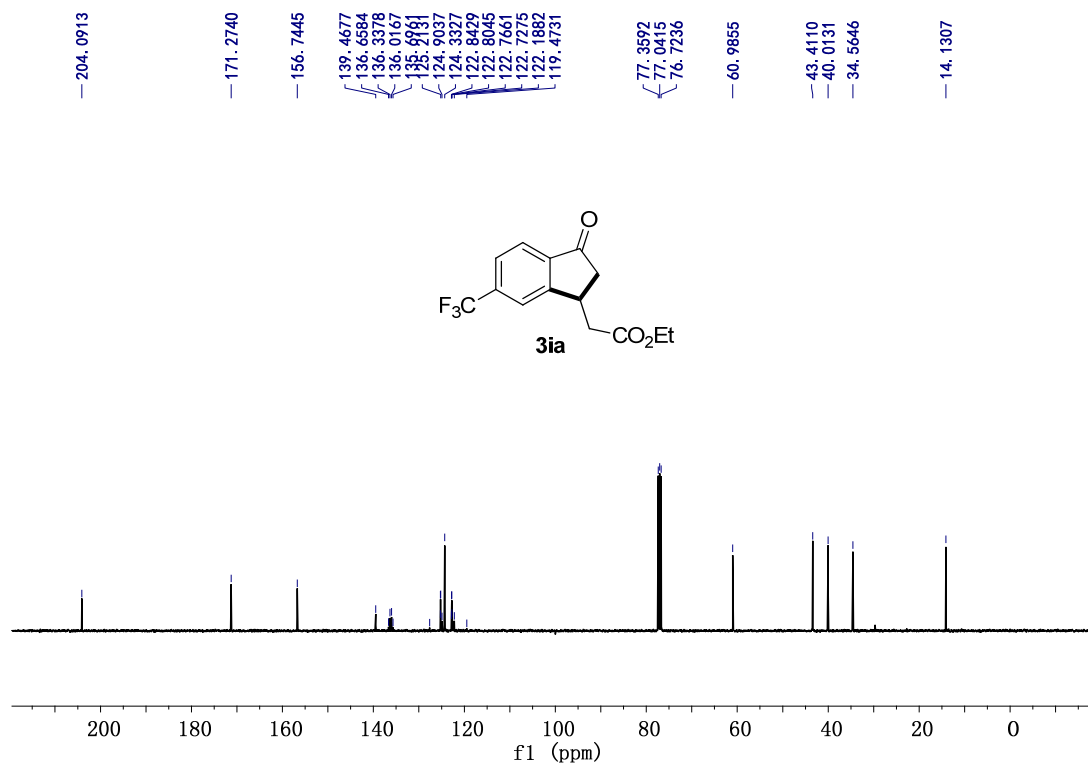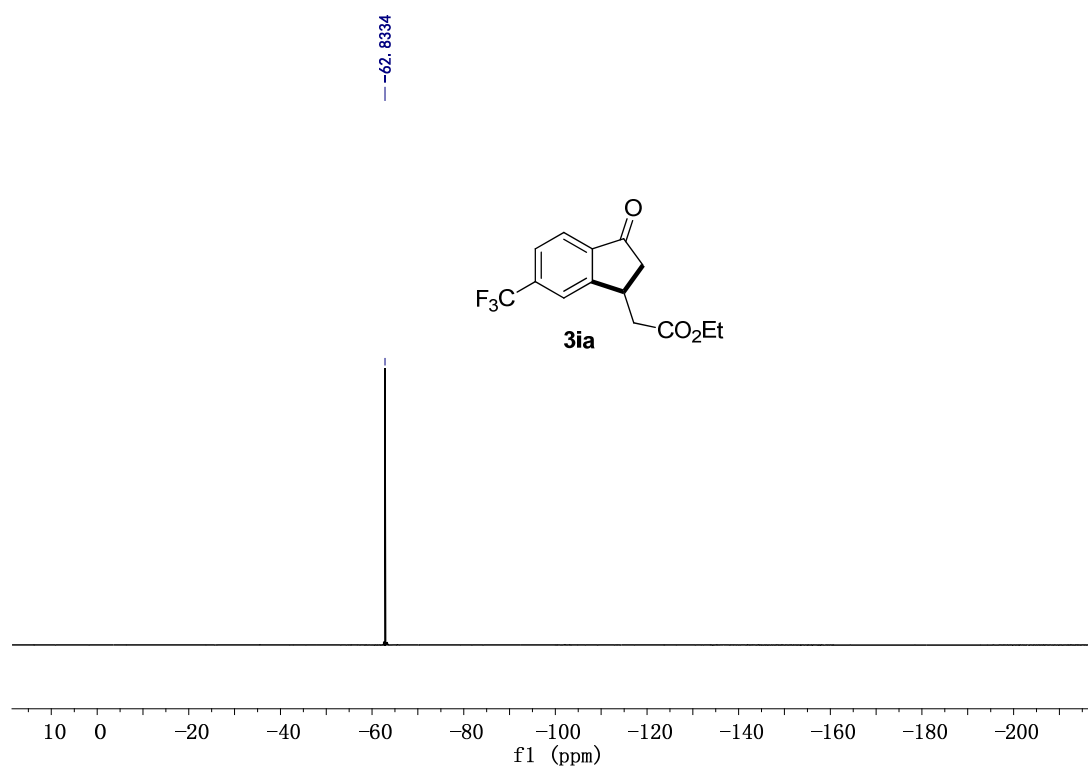

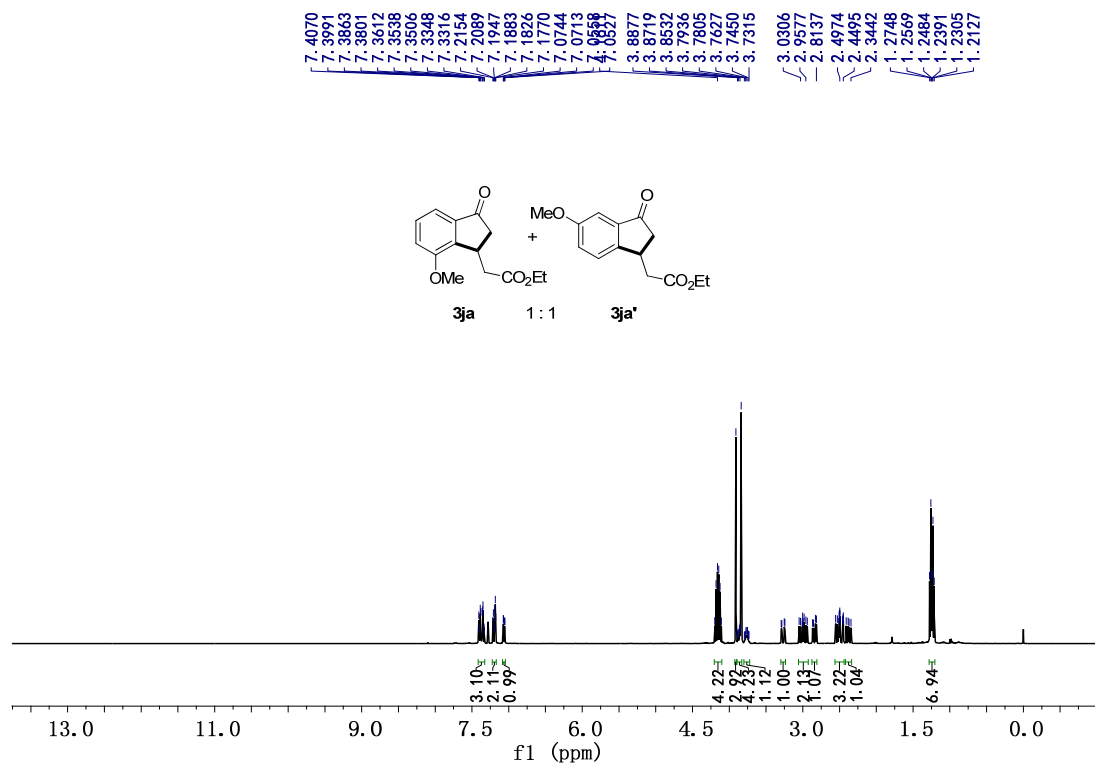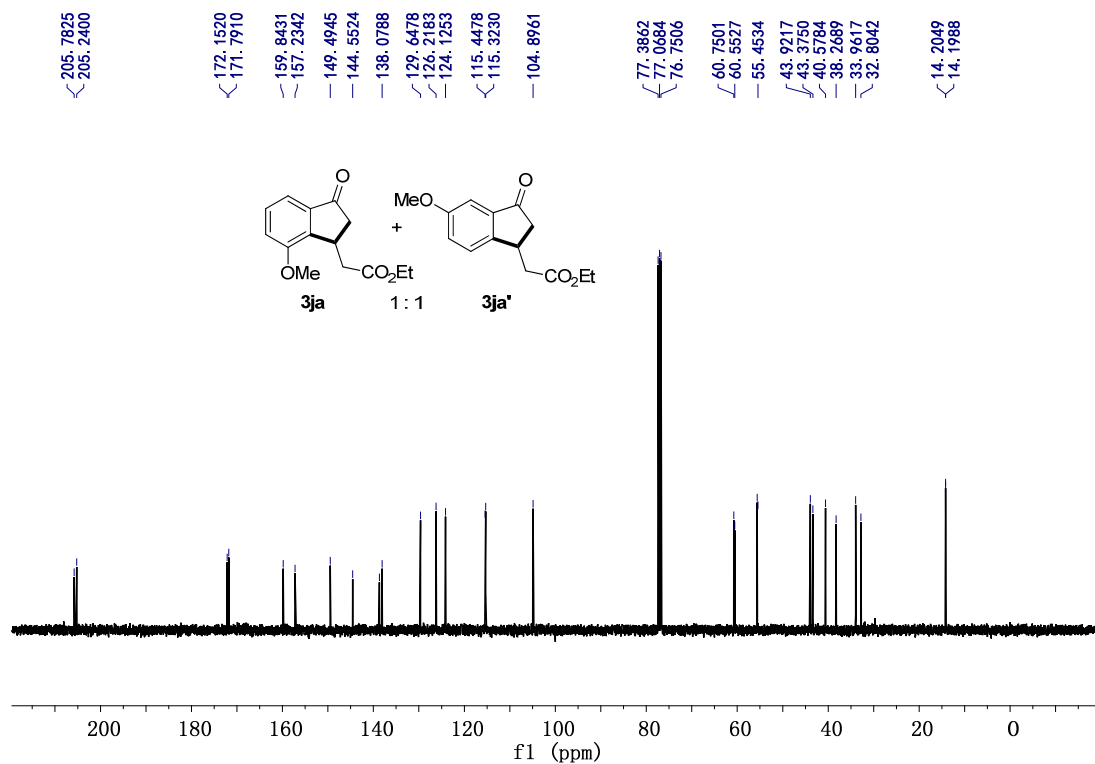

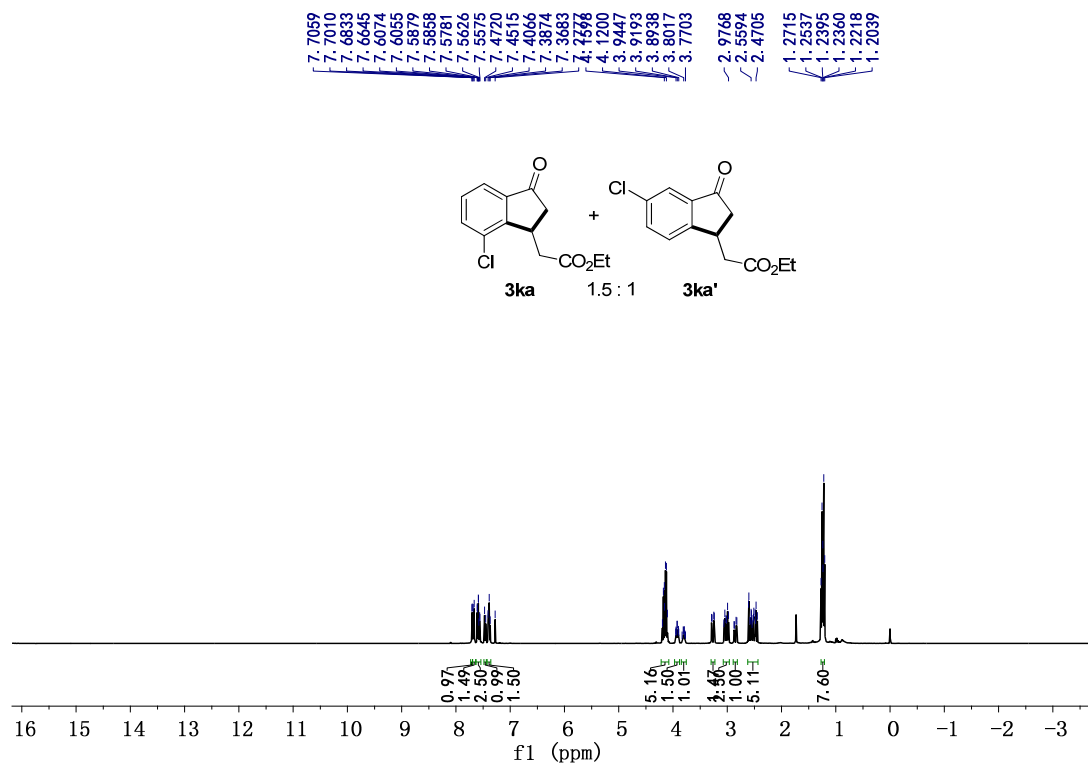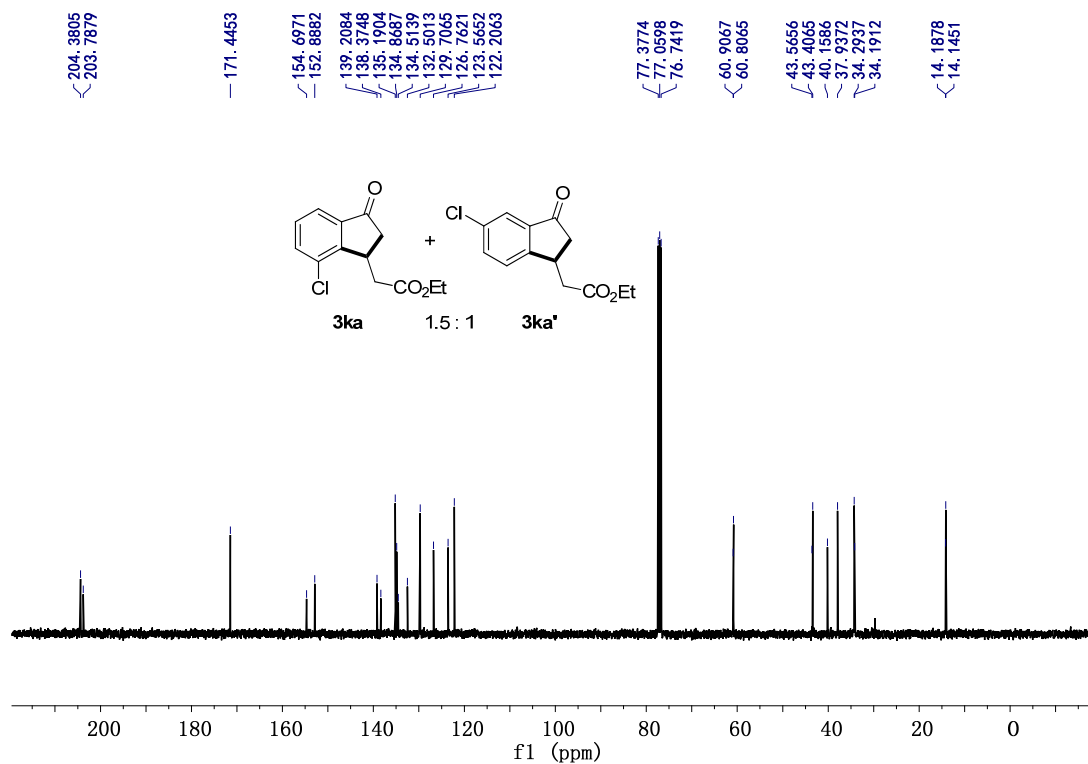

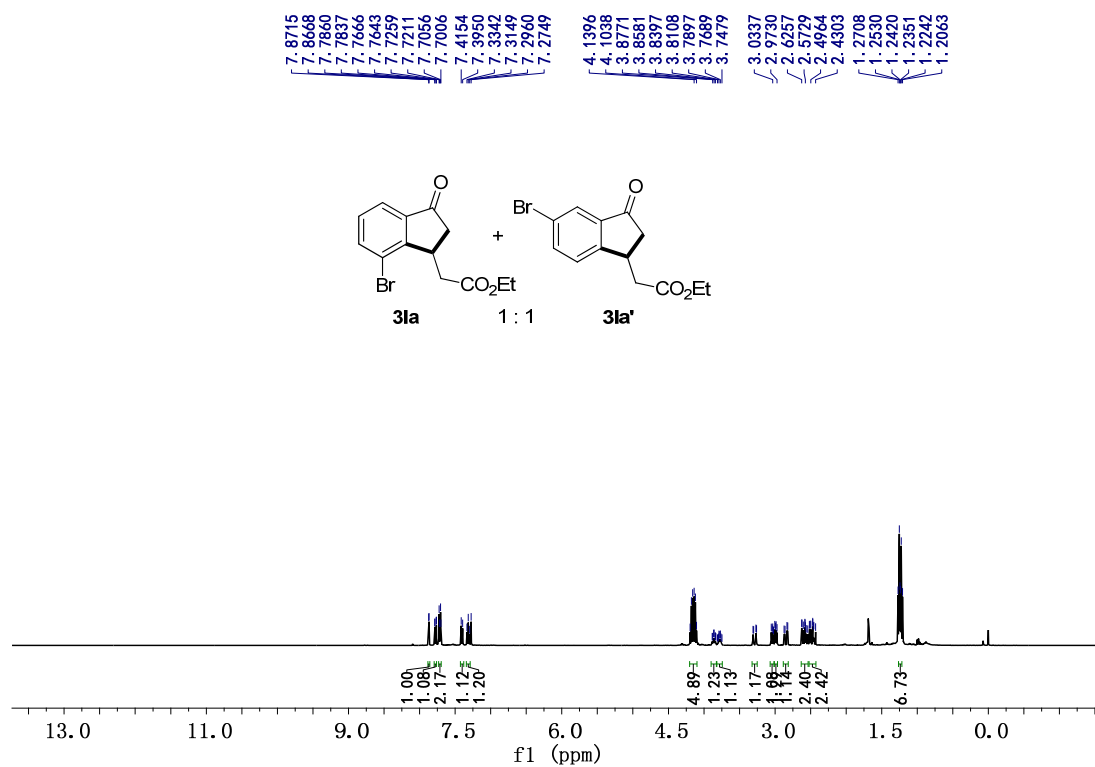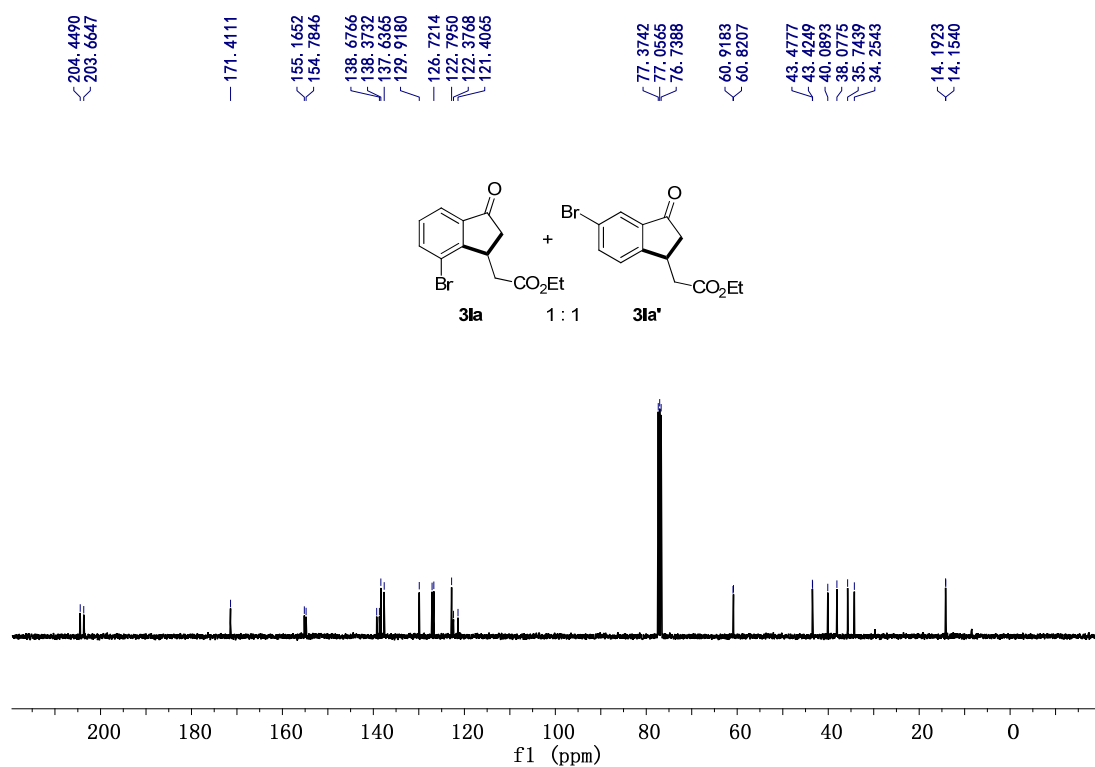

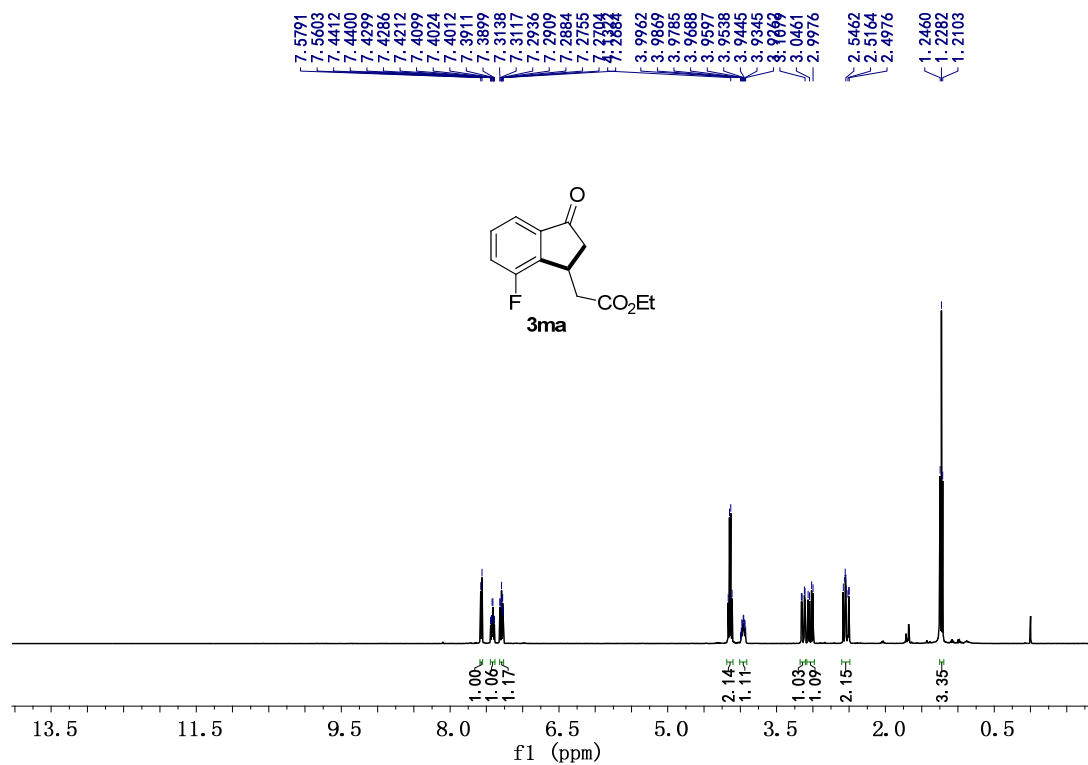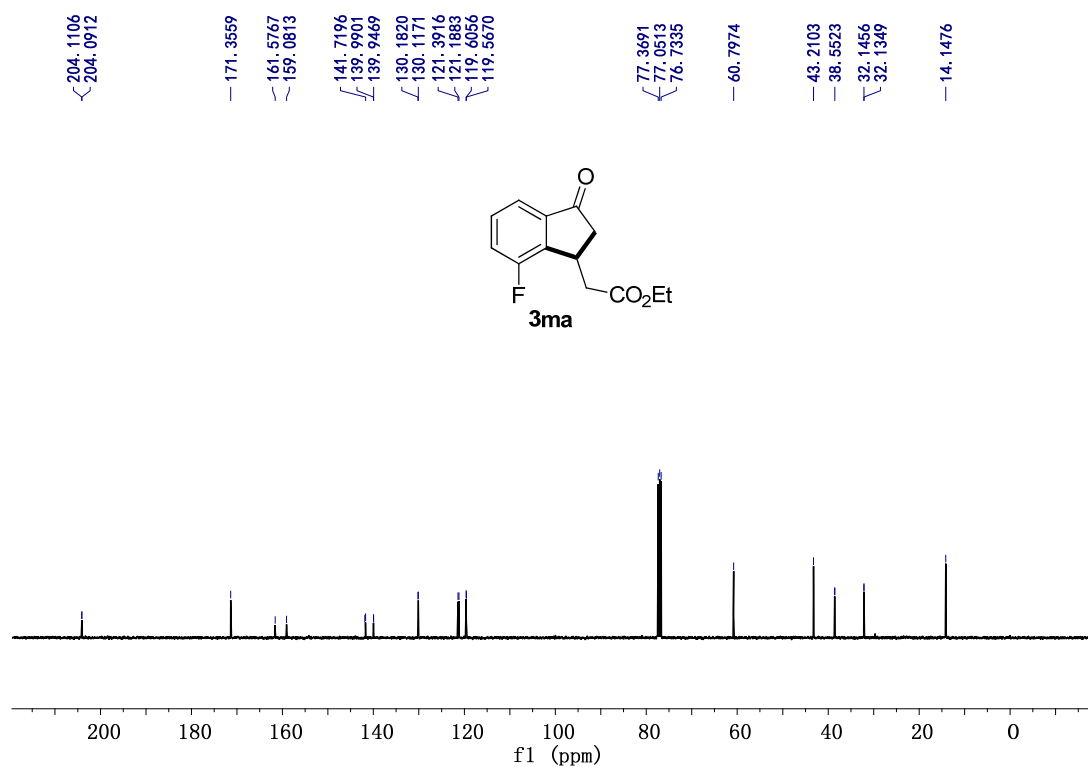

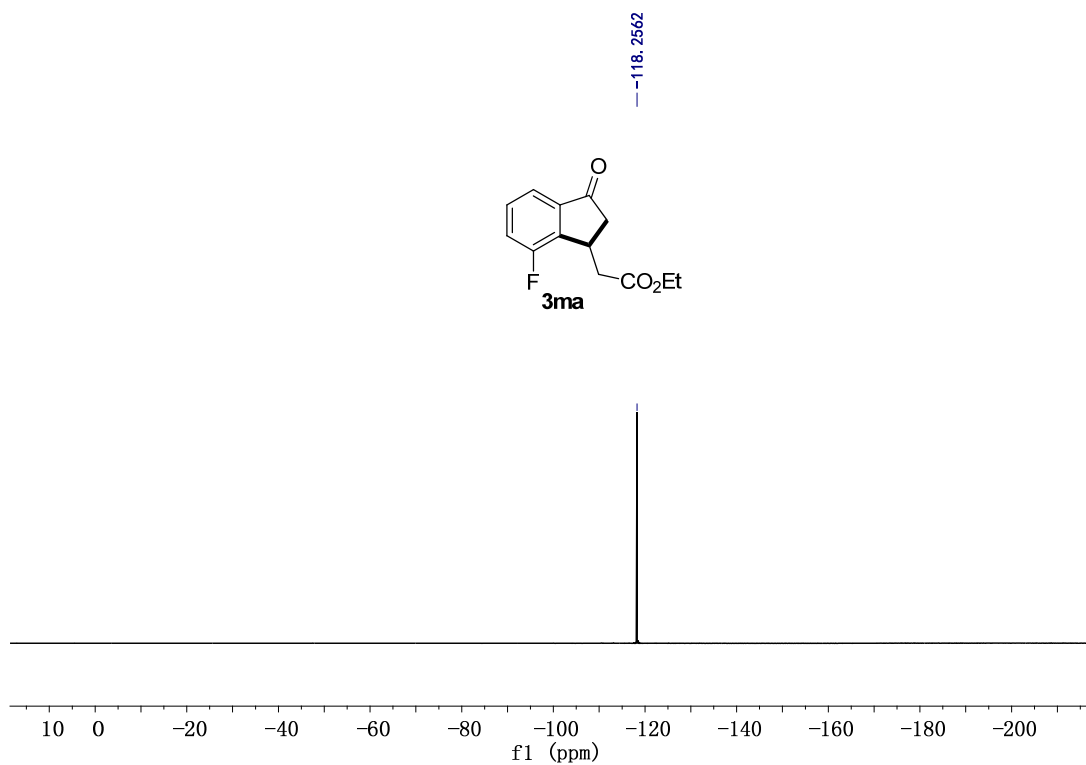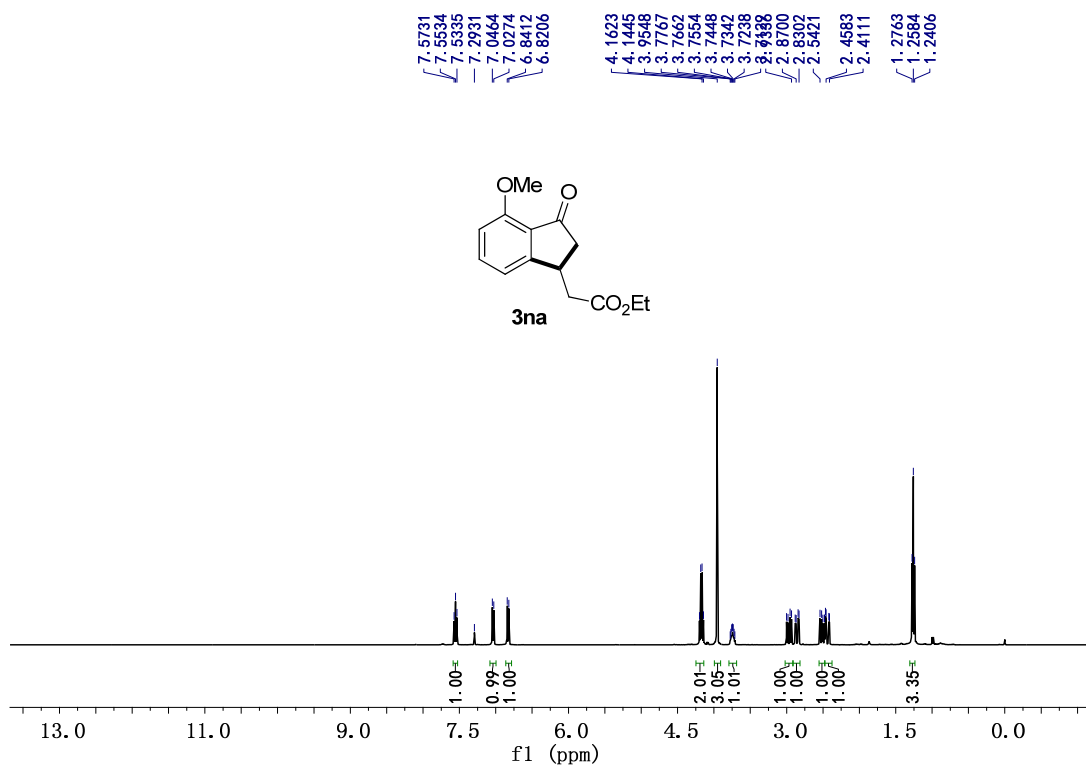

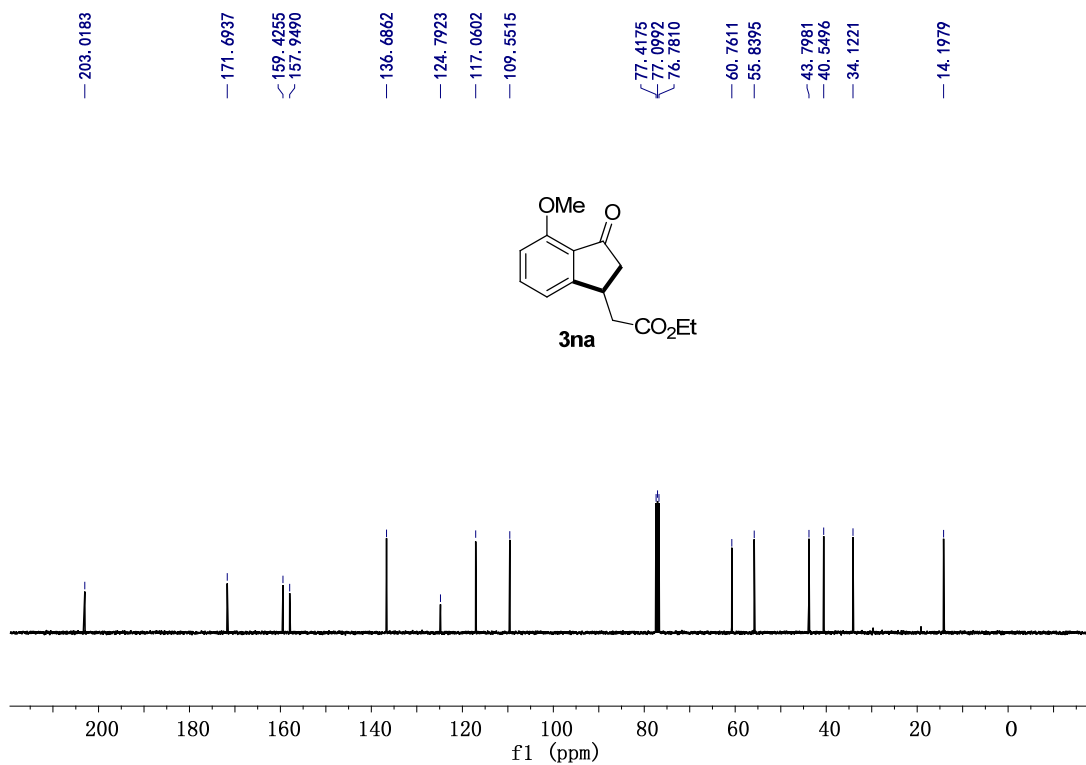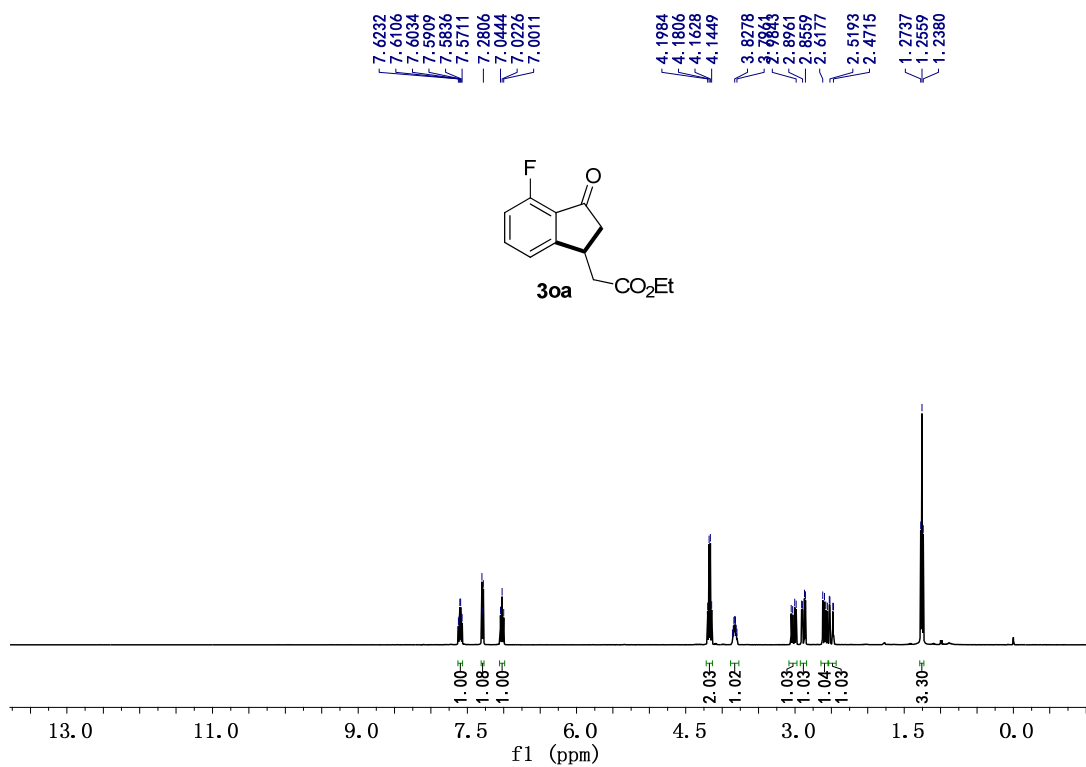

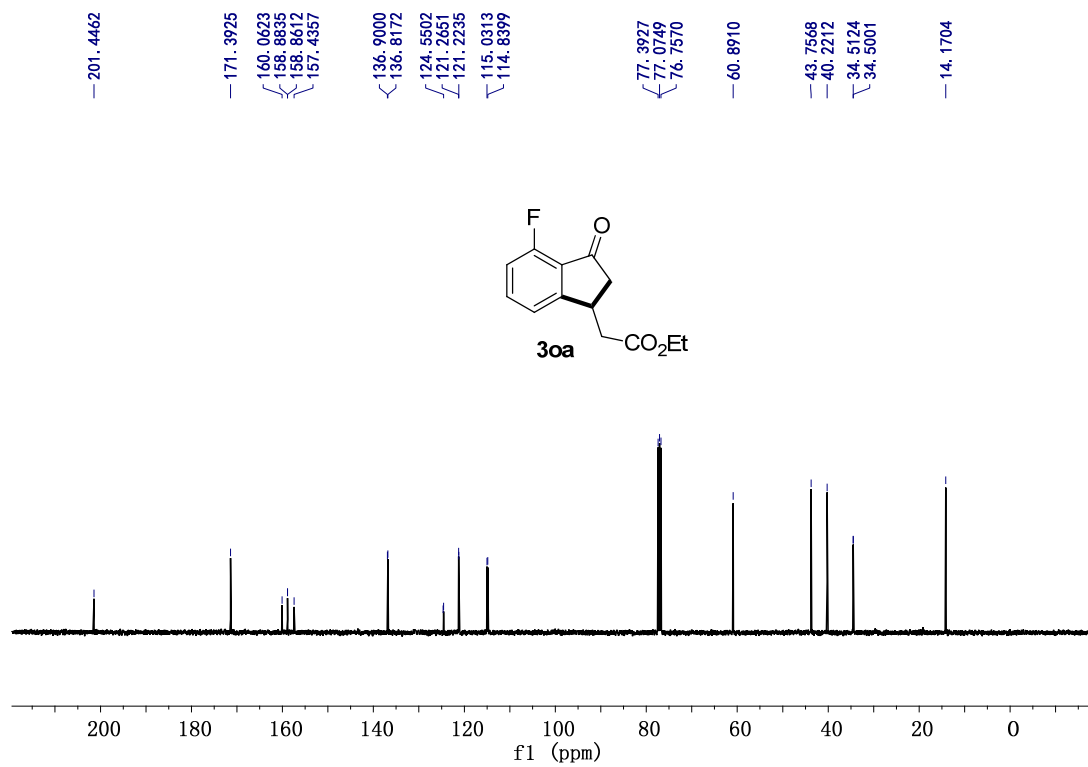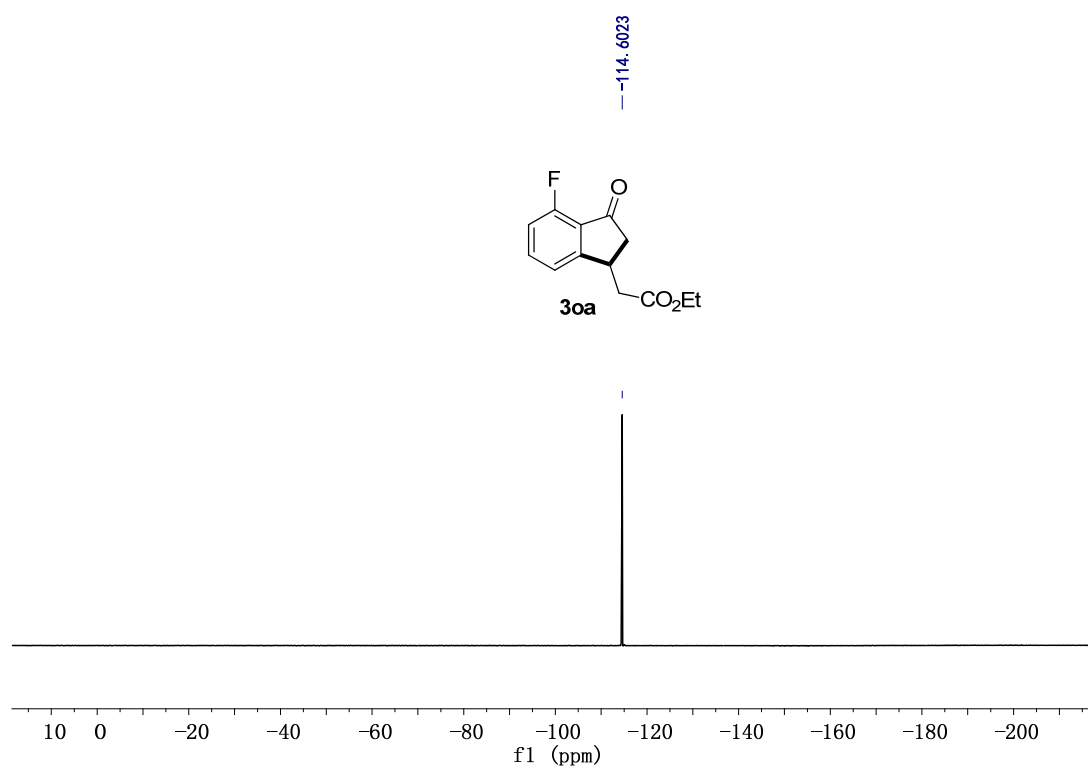

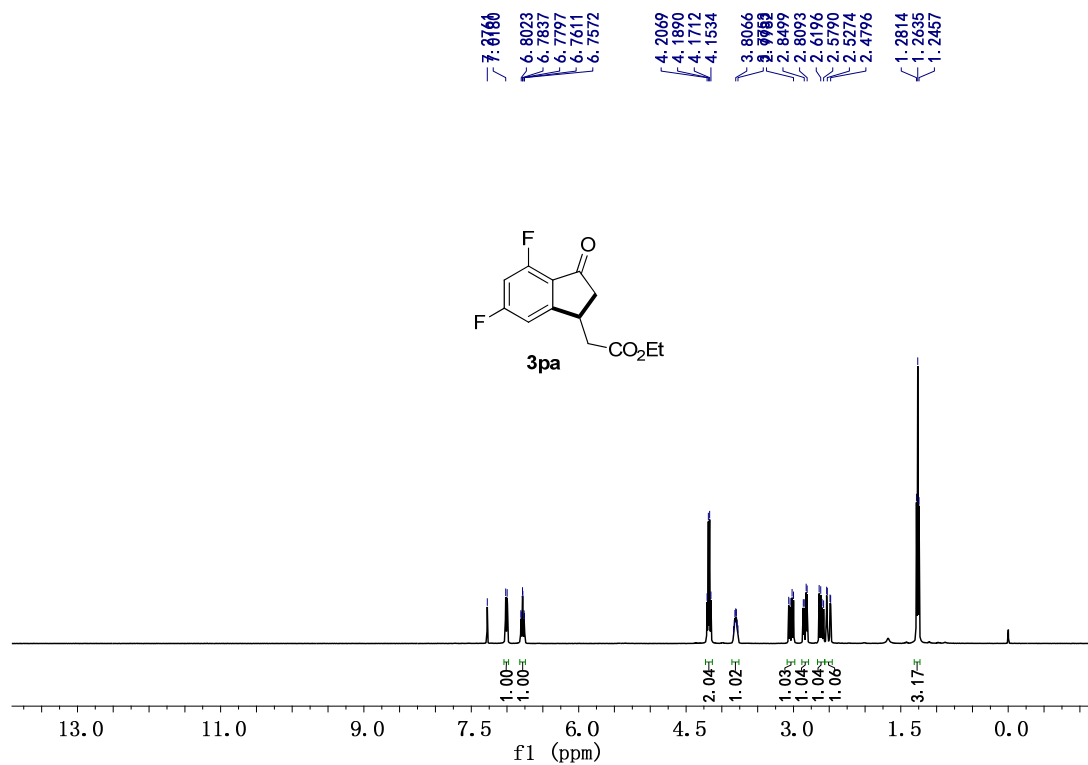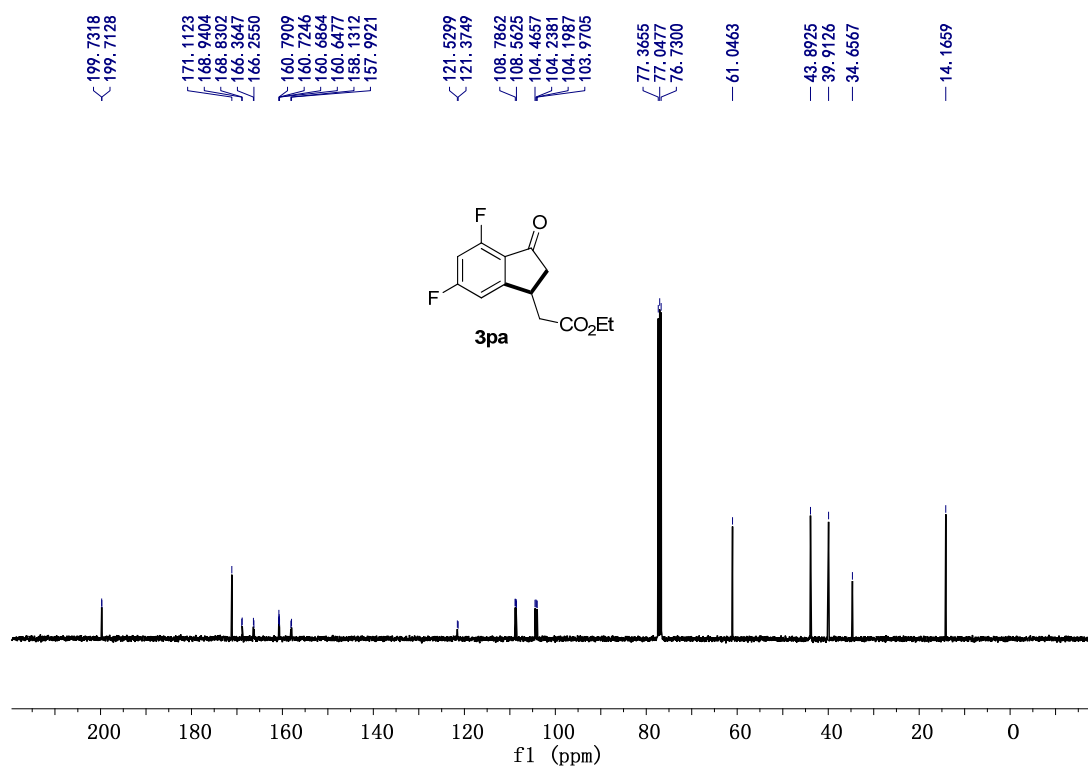

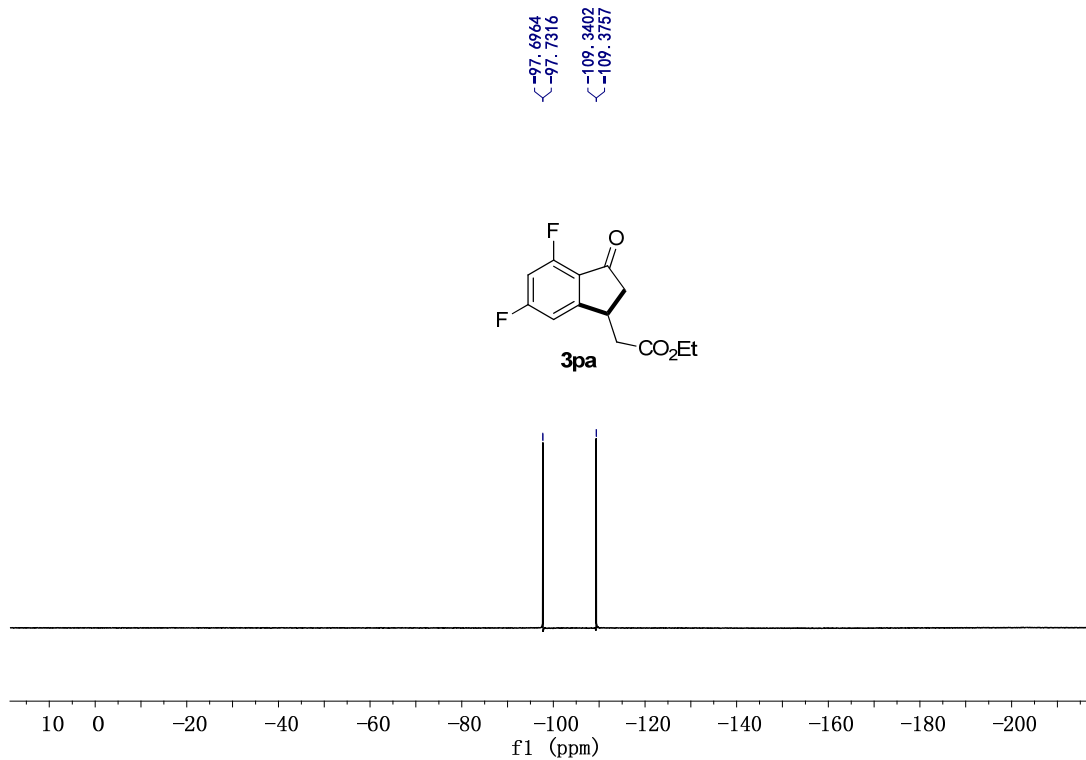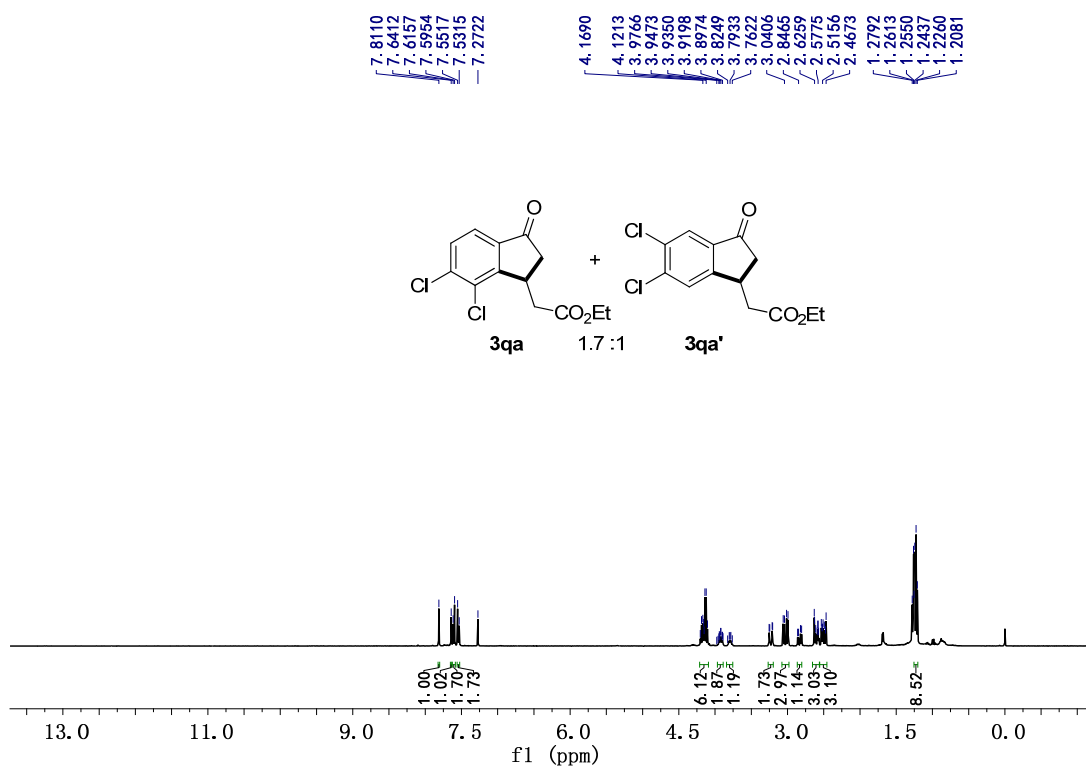

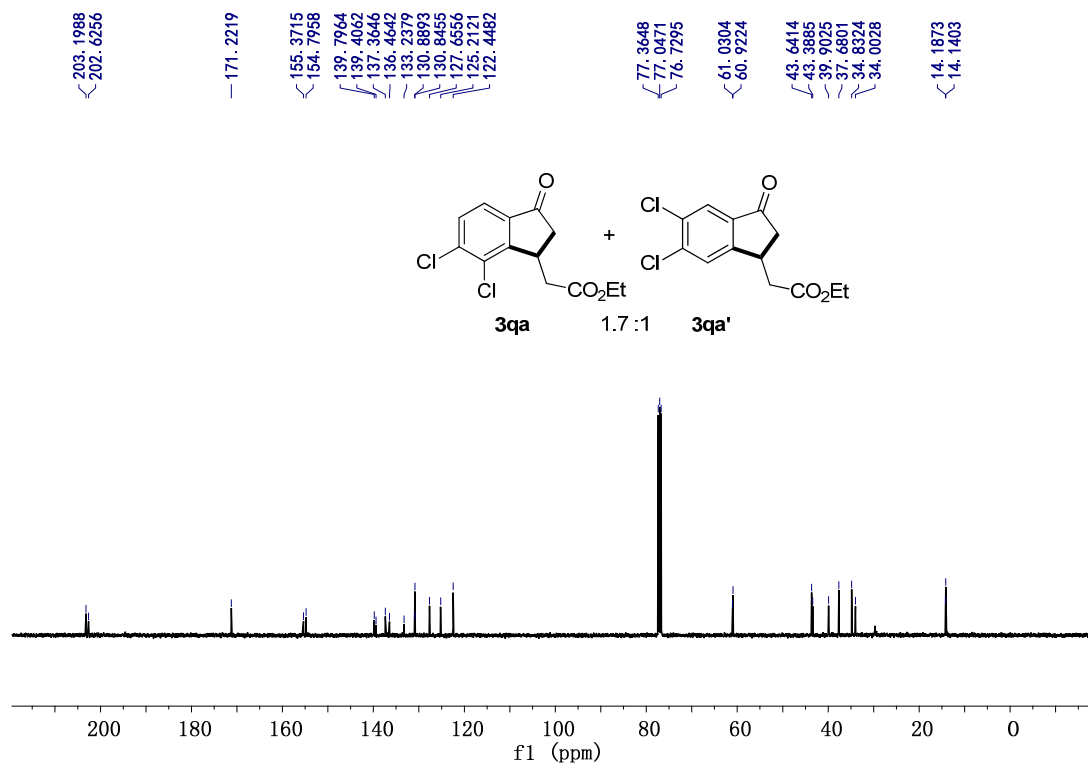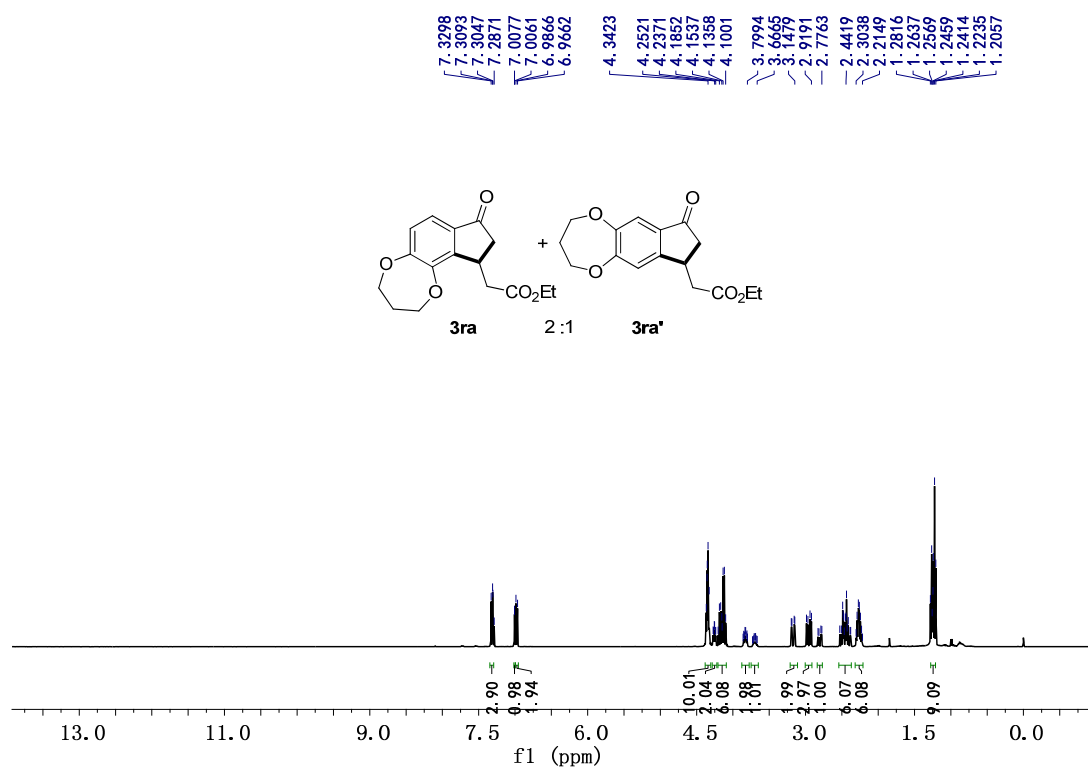

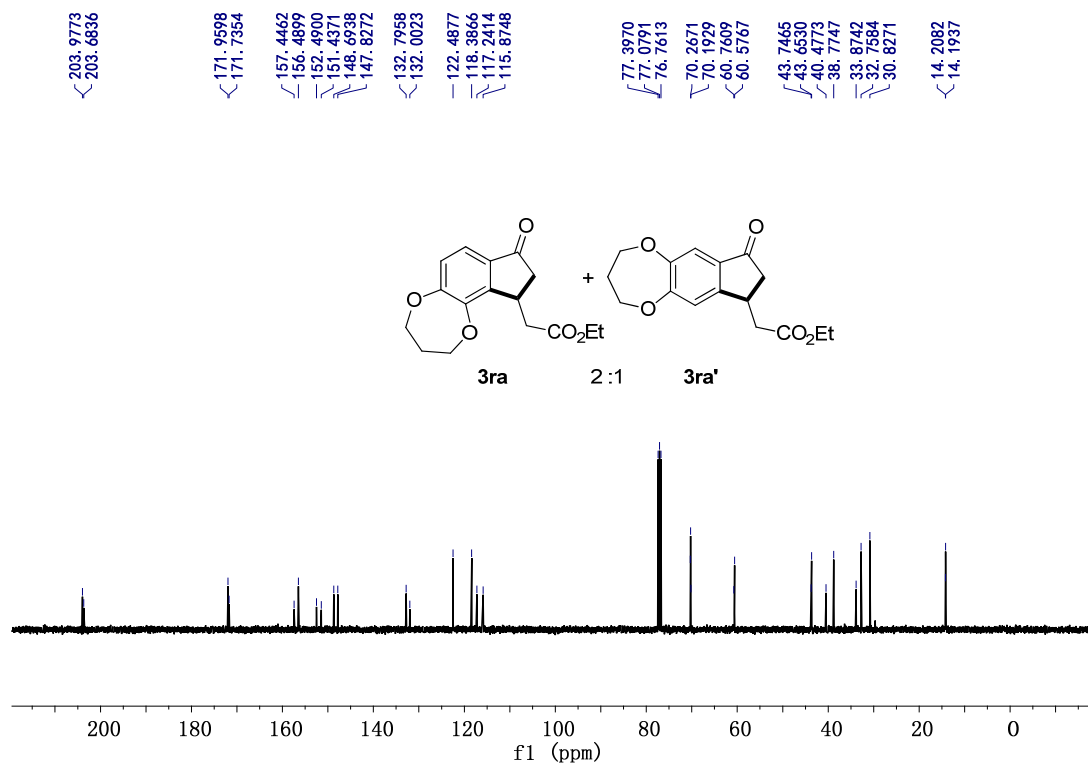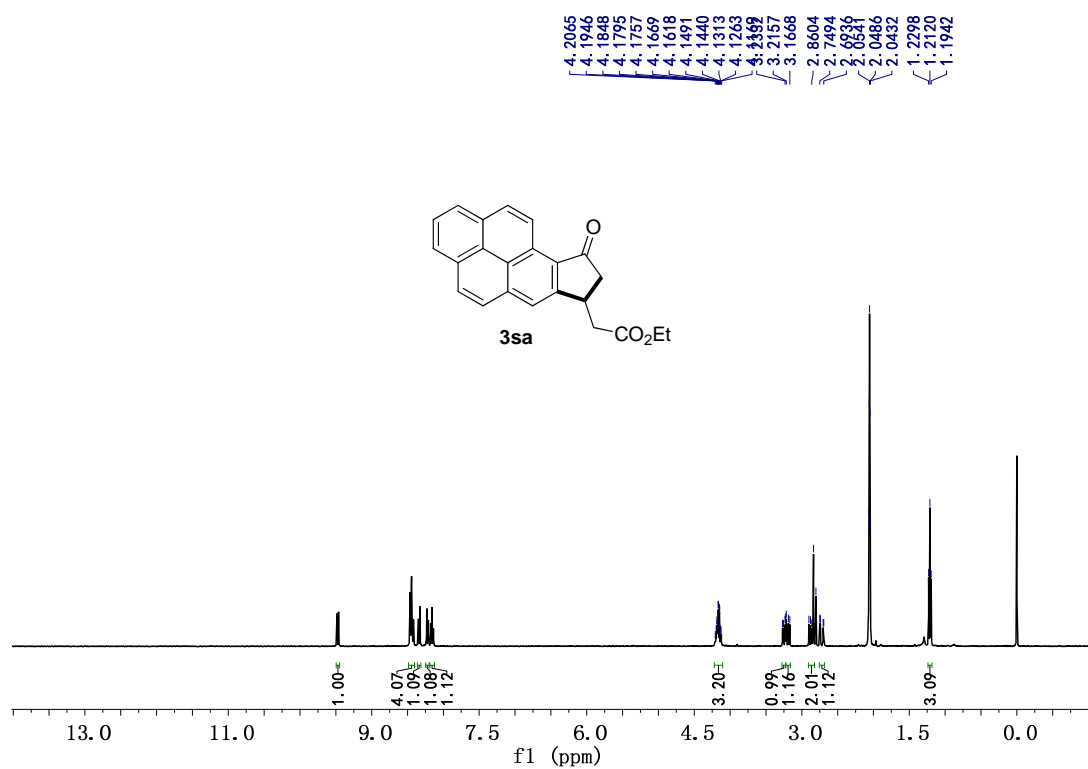

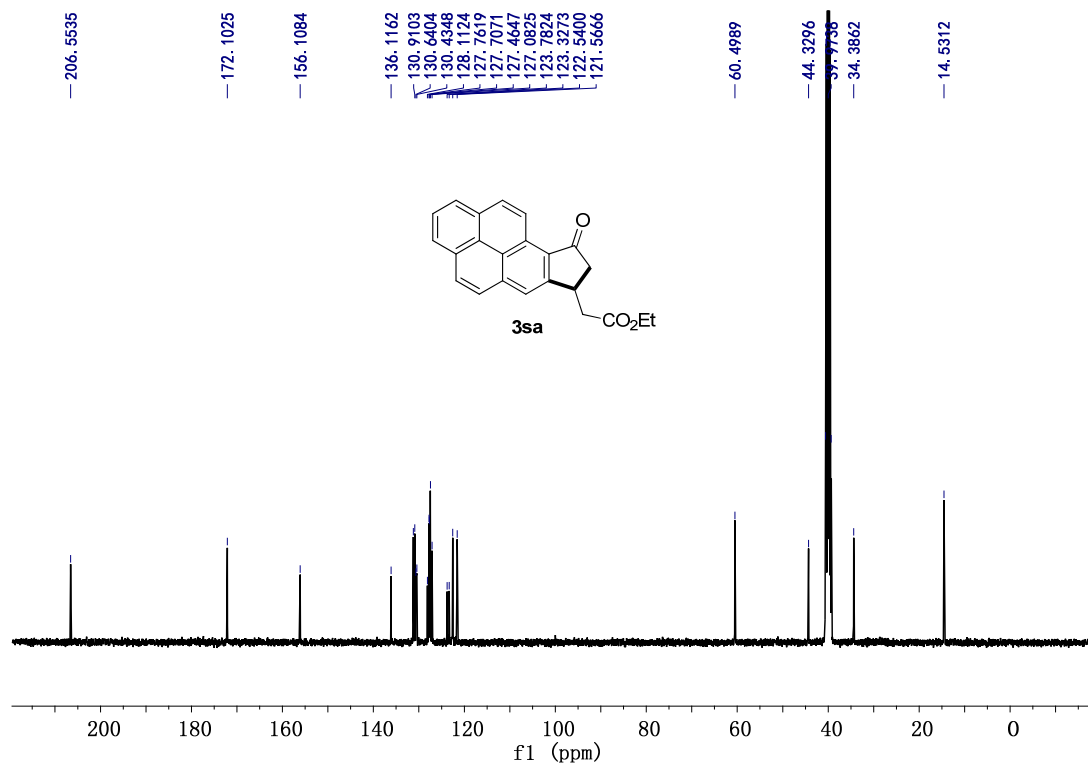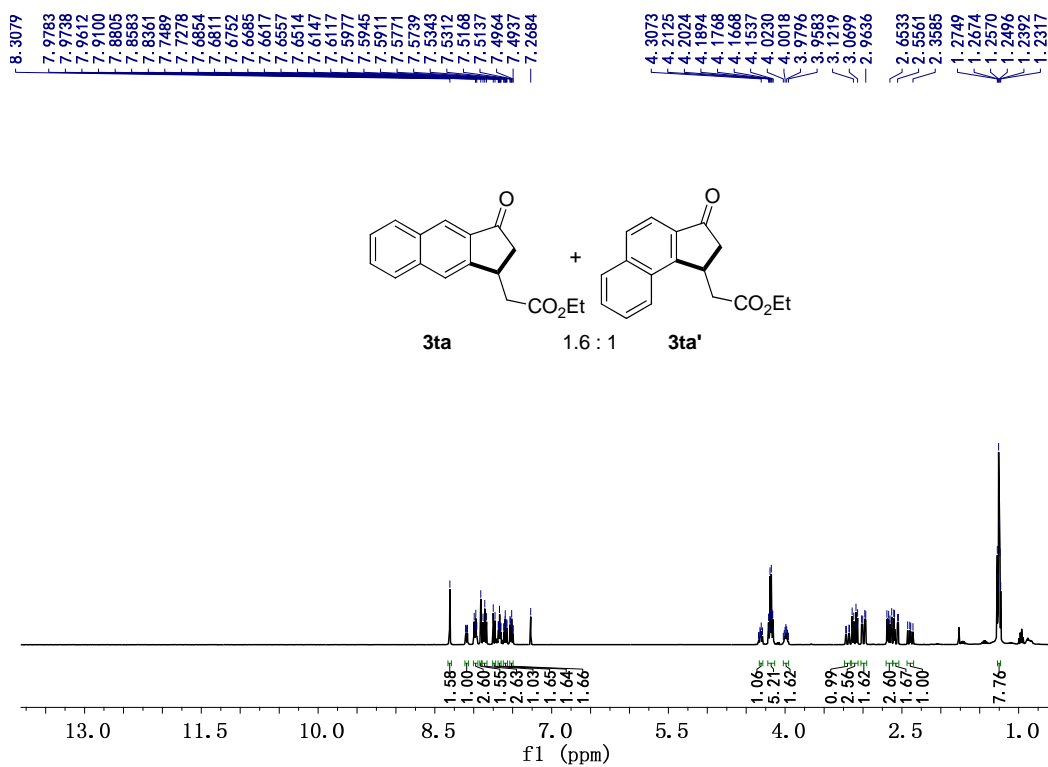

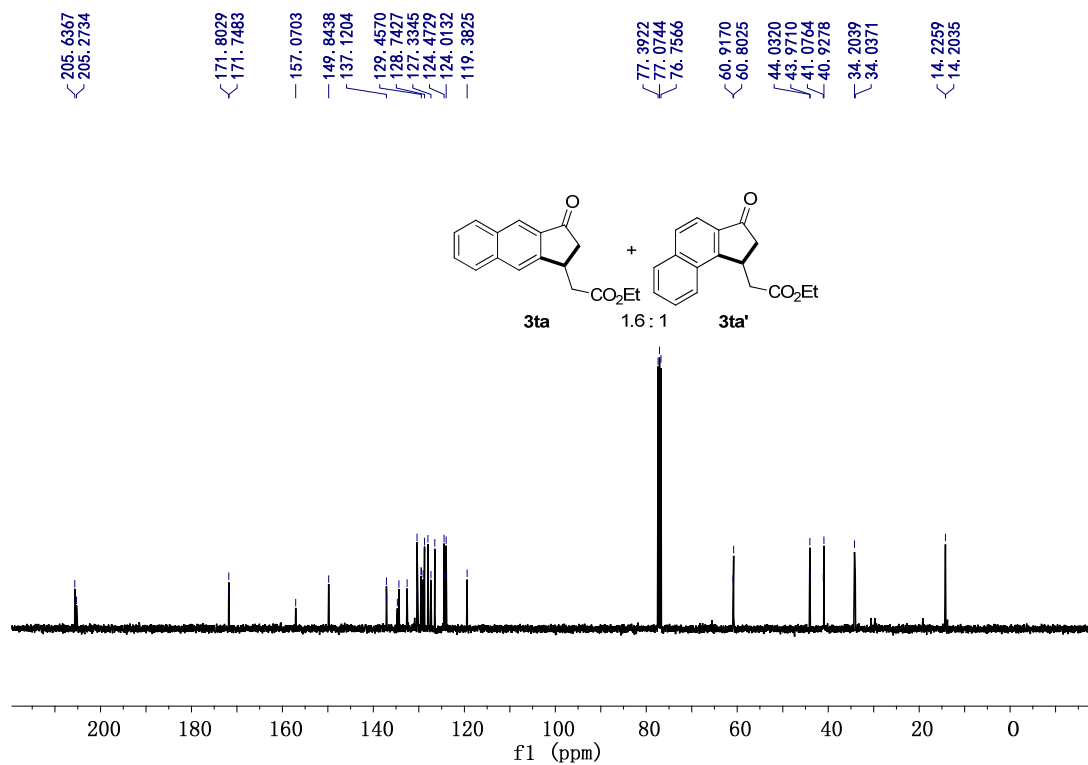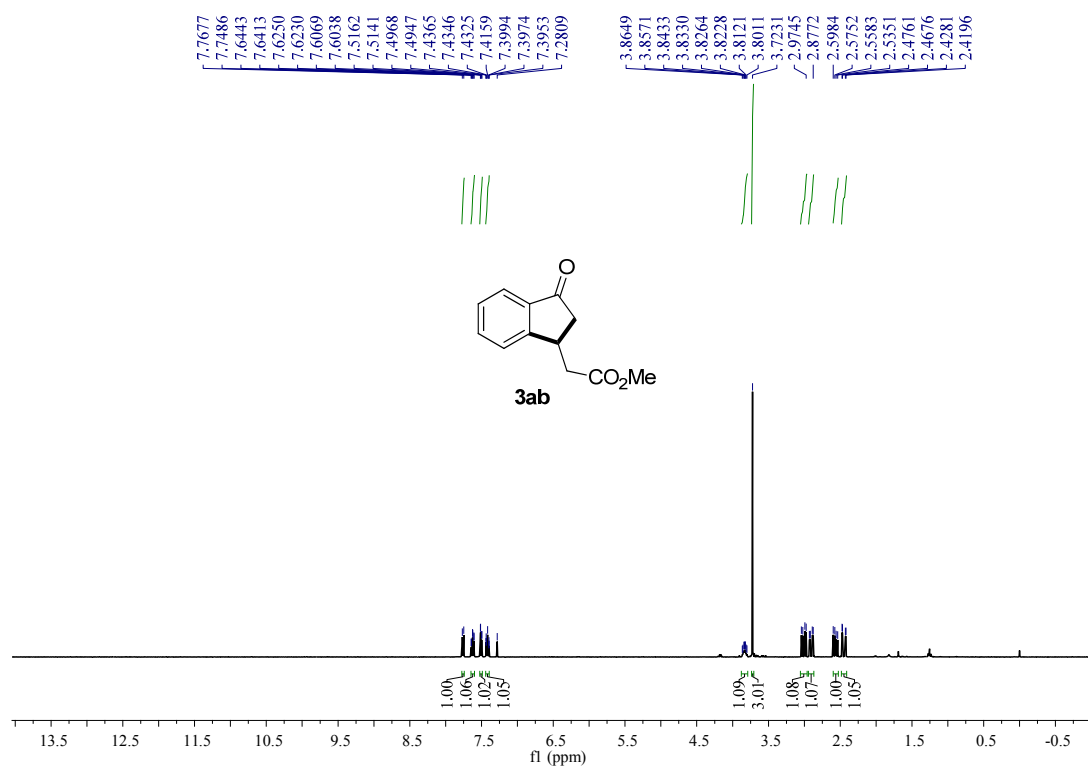

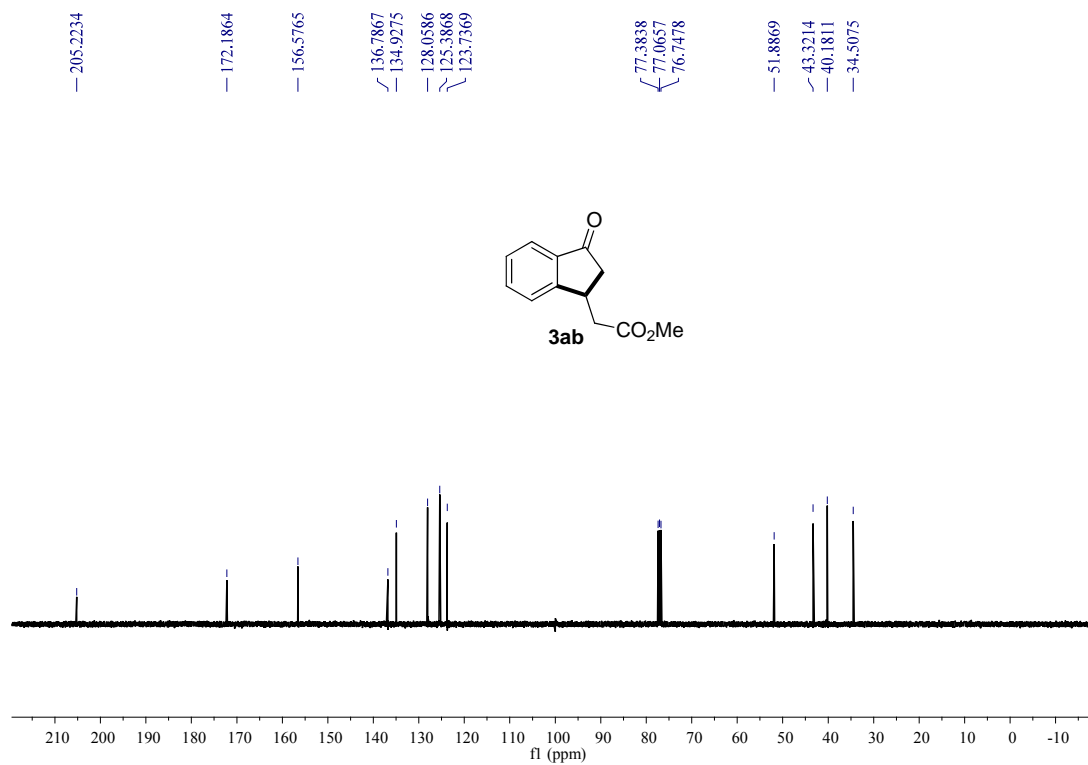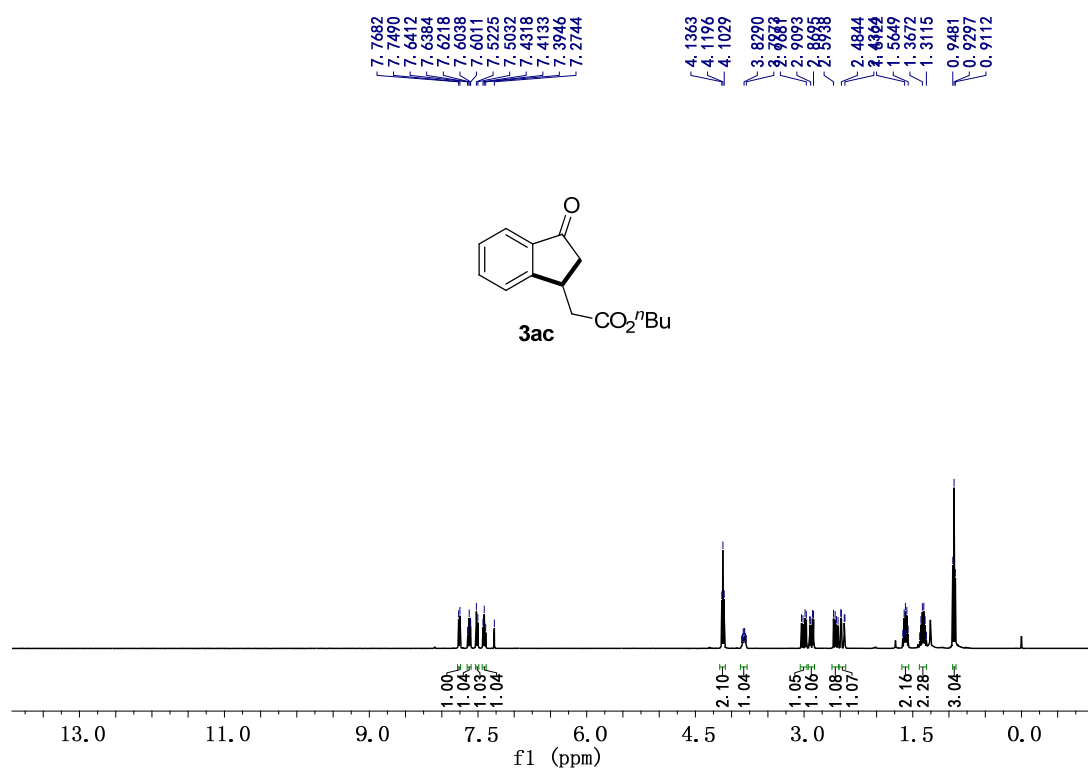

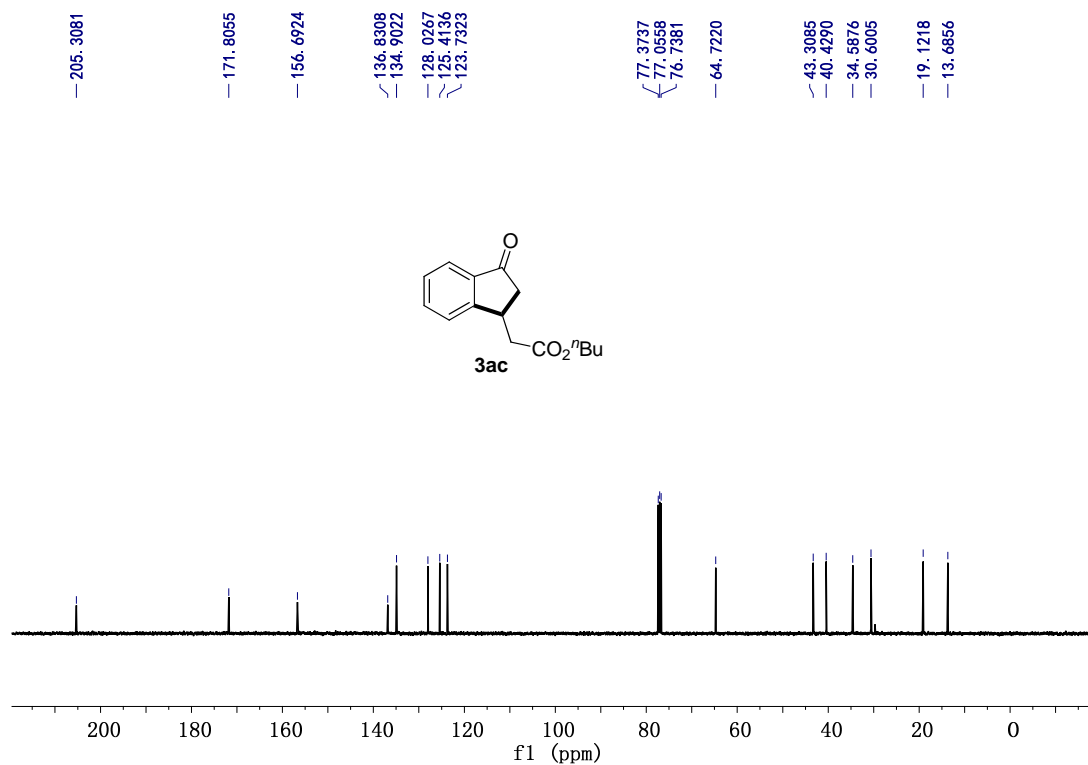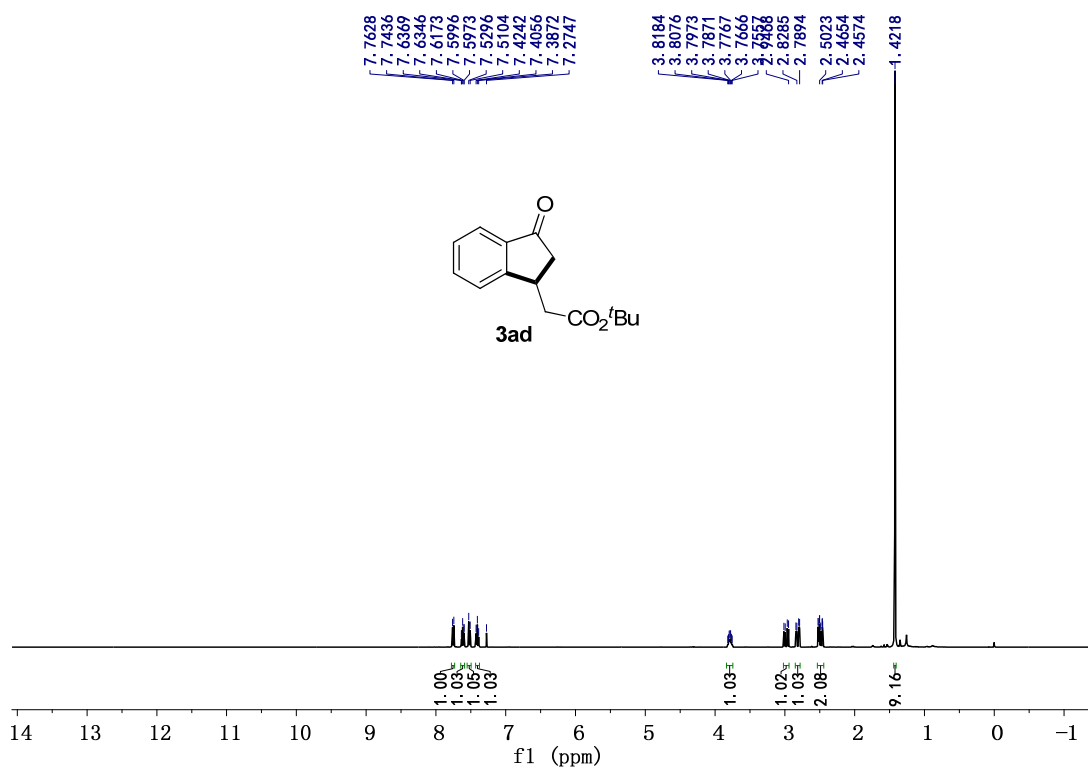

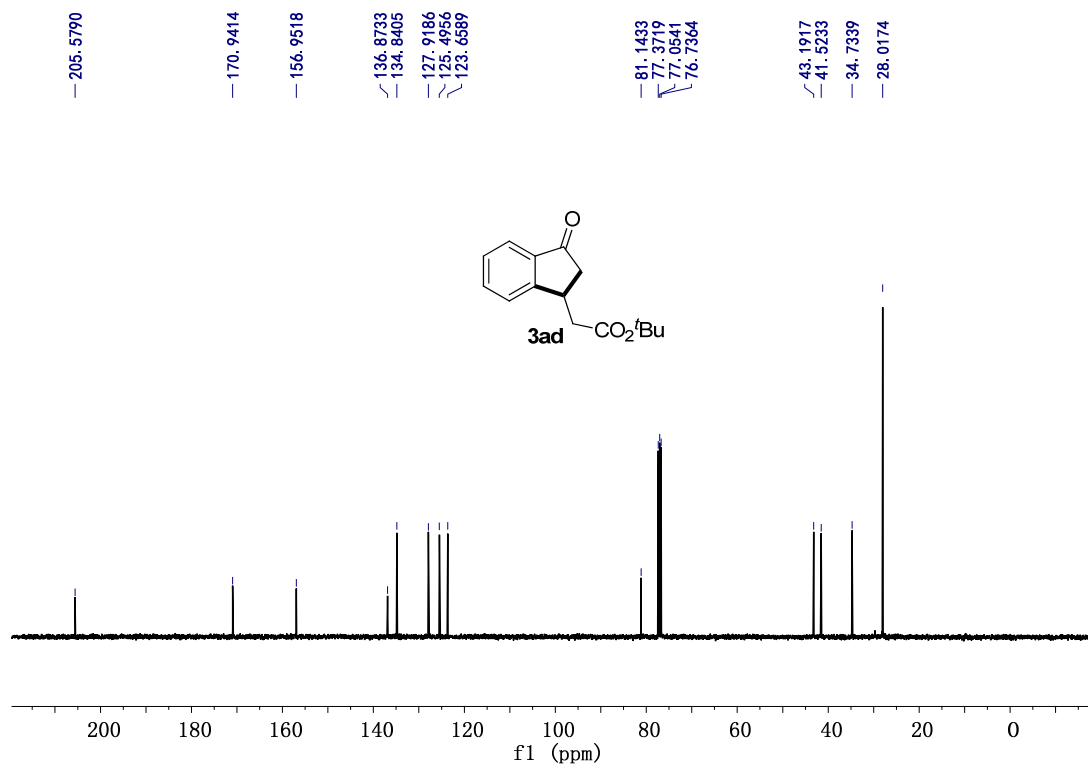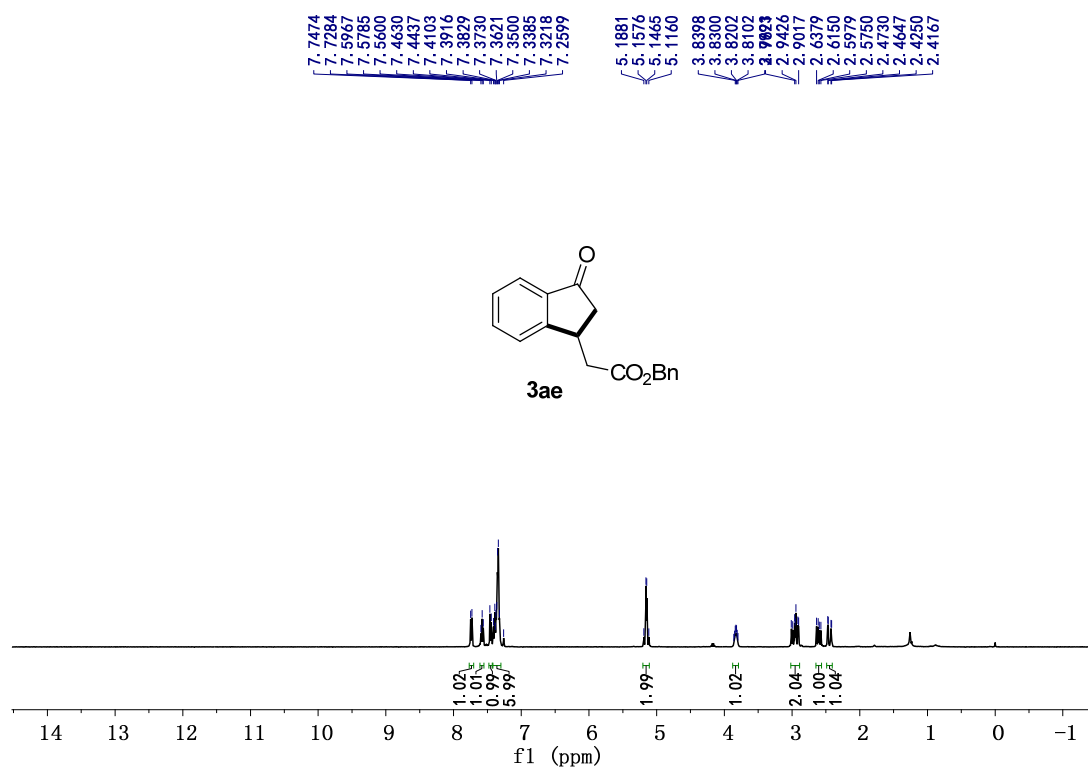

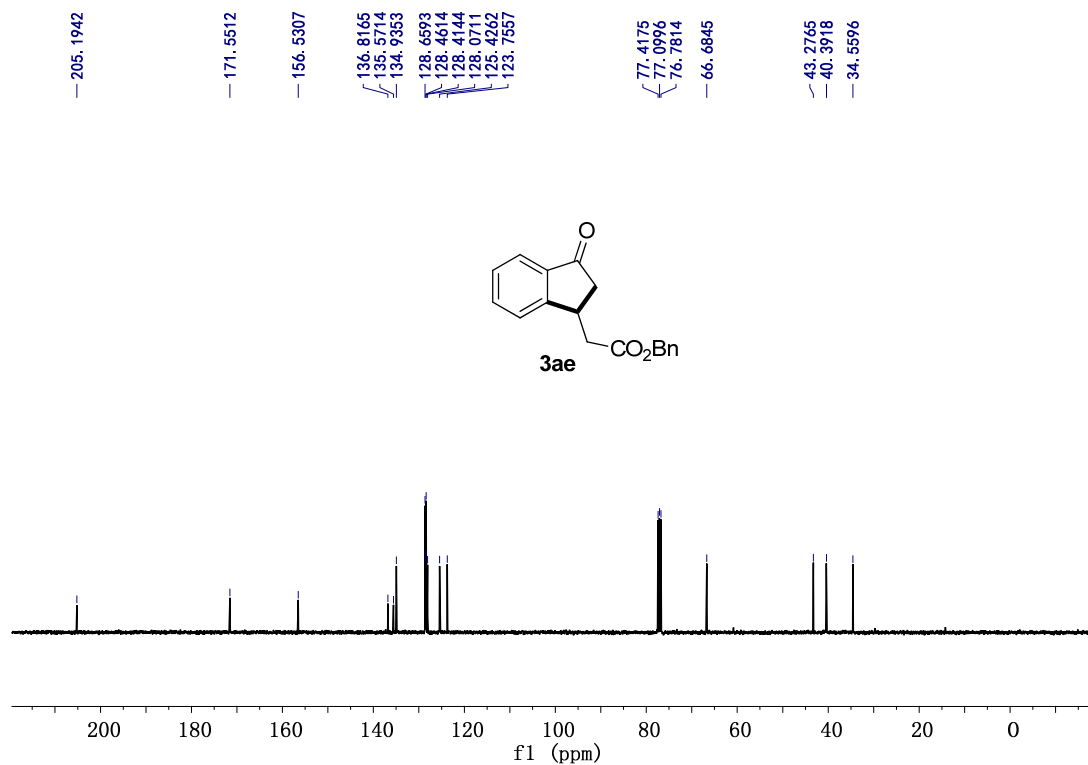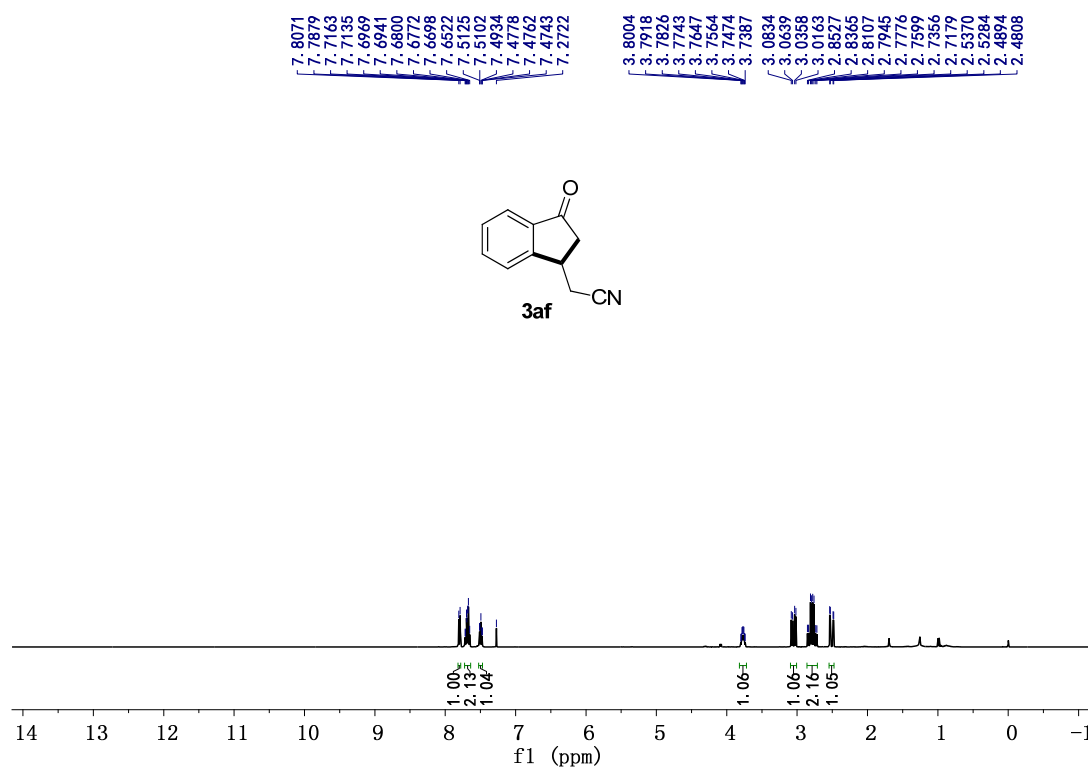

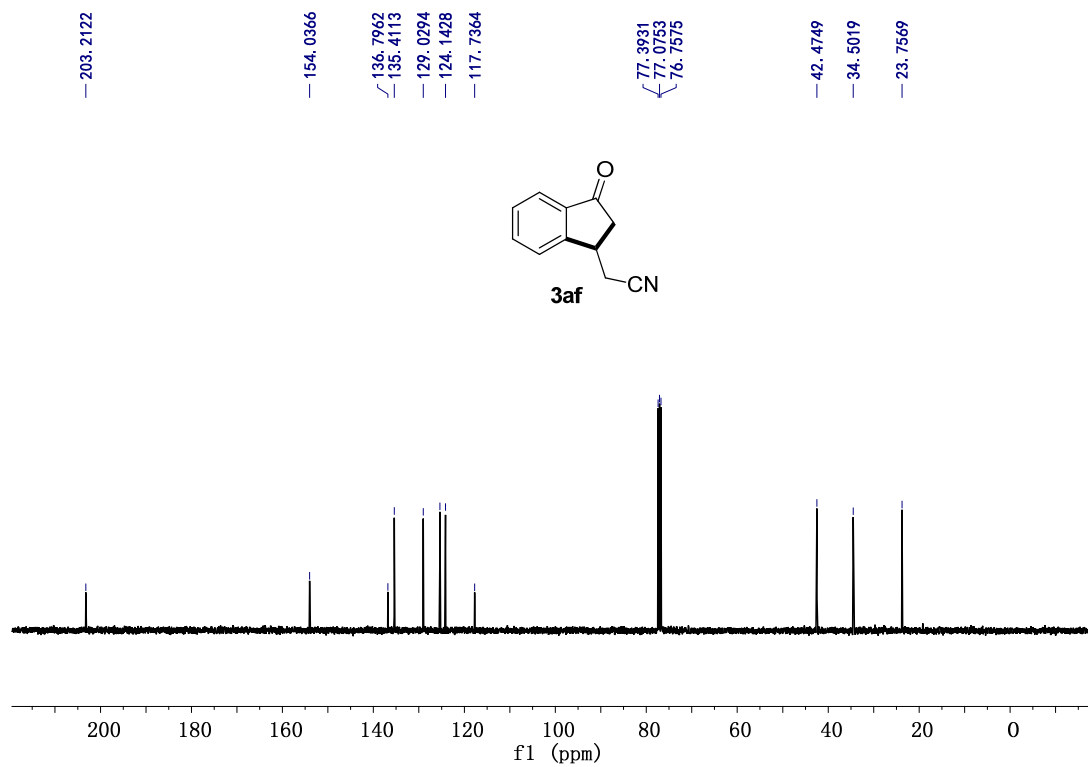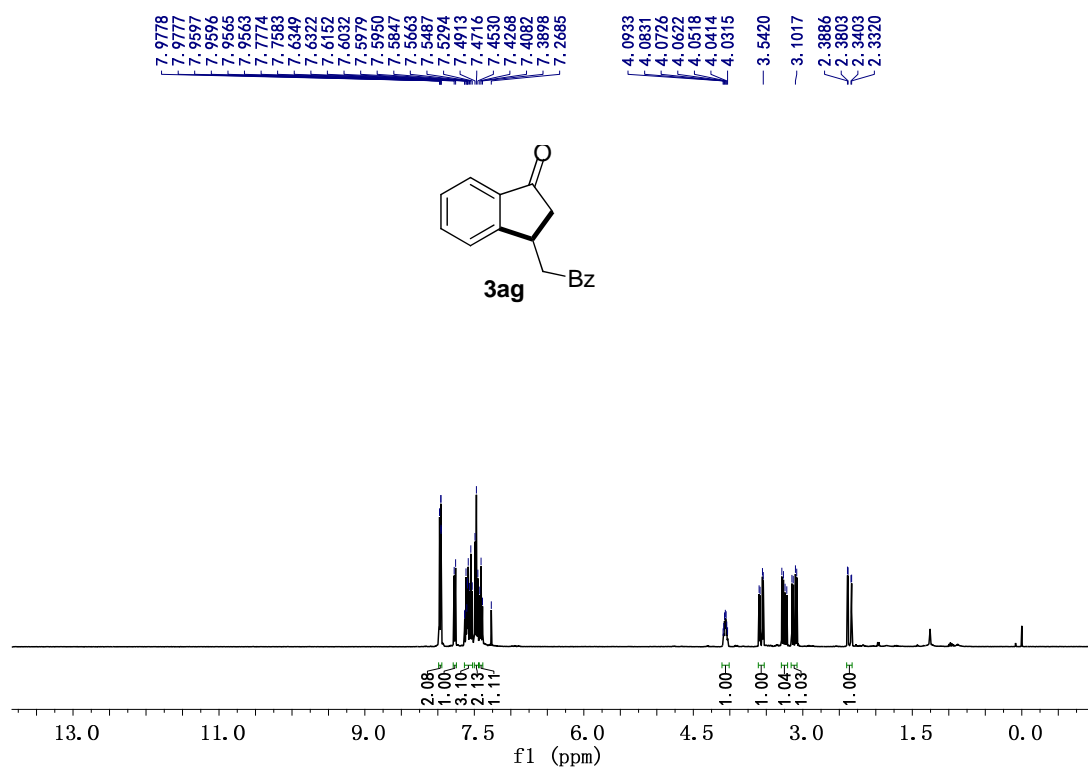

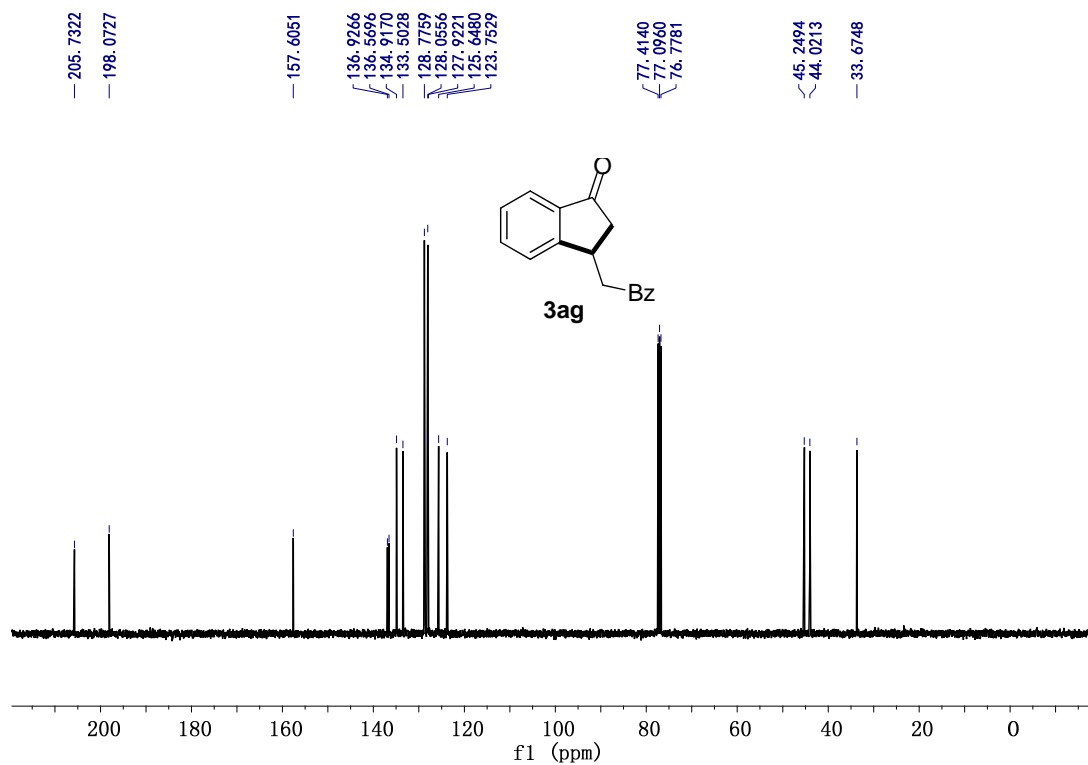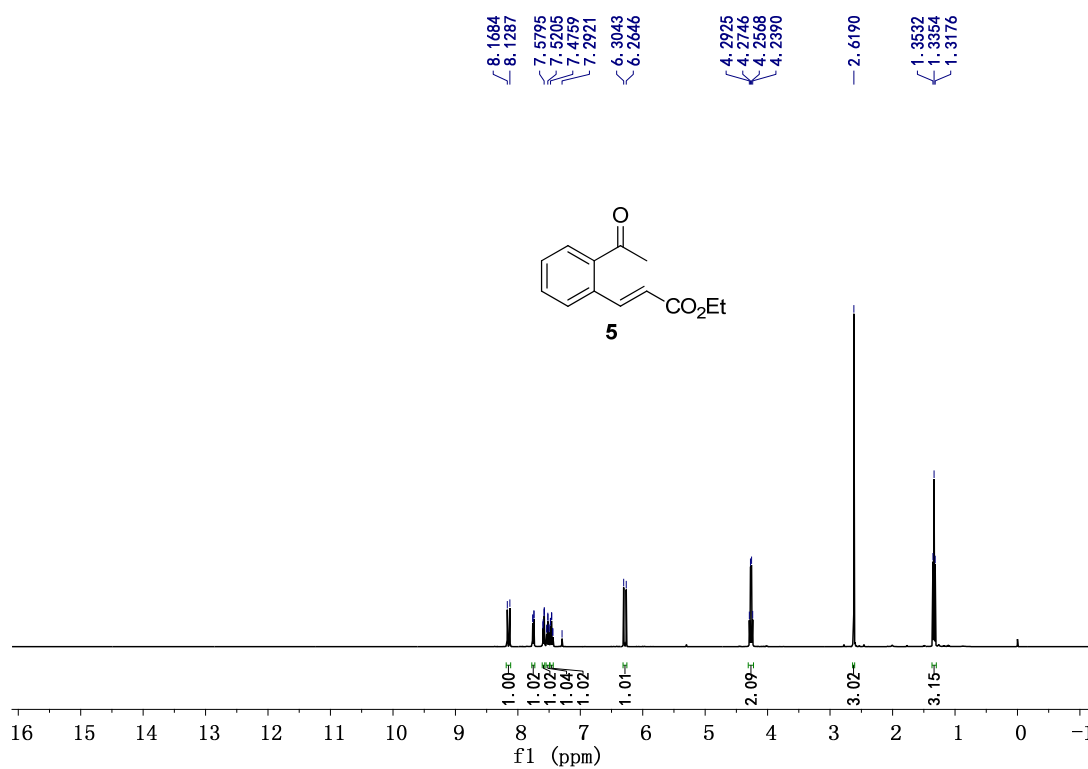

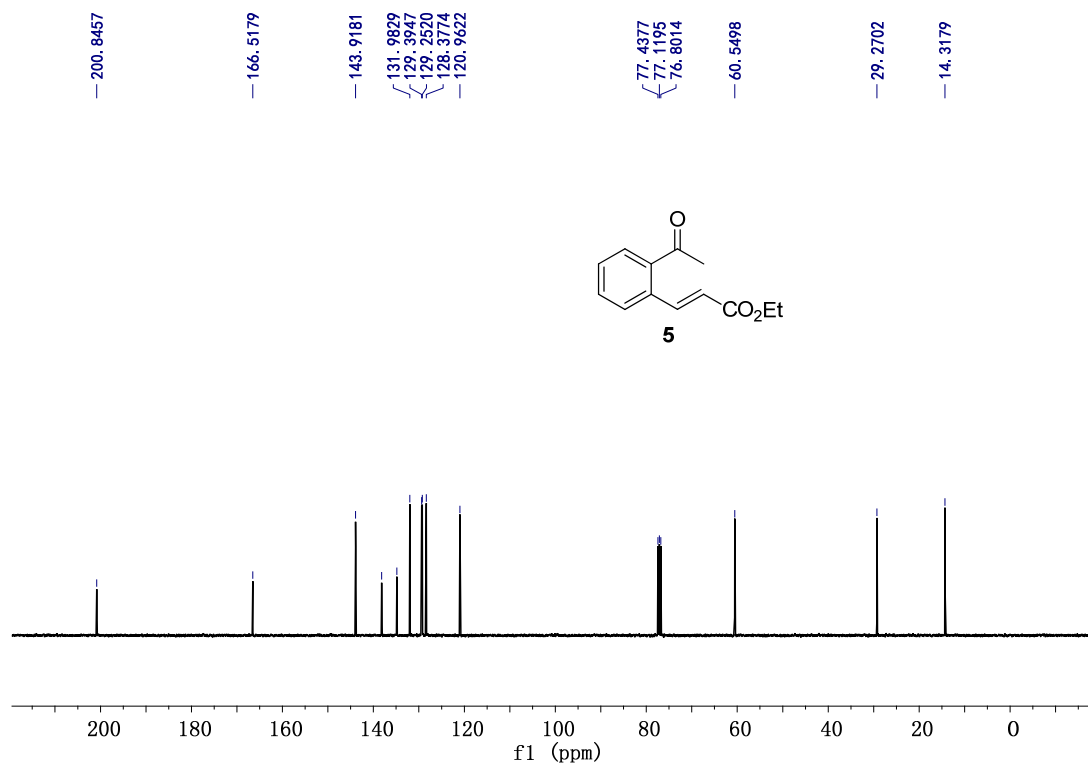

Supplement: c7qo00510e1.pdf [file c7qo00510e1.pdf]
